# Supplementary material for: Effect of household relocation on child vaccination and health service utilisation in Dhaka, Bangladesh: a cross-sectional community survey
Source: PubMed Central journal article supplement (PMC6429946; doi:10.1136/bmjopen-2018-026176), 2019-03-15
Supplement: bmjopen-2018-026176.draft_revisions.pdf [file bmjopen-2018-026176.draft_revisions.pdf]

# BMJ Open

BMJ Open is committed to open peer review. As part of this commitment we make the peer review history of every article we publish publicly available.

When an article is published we post the peer reviewers' comments and the authors' responses online. We also post the versions of the paper that were used during peer review. These are the versions that the peer review comments apply to.

The versions of the paper that follow are the versions that were submitted during the peer review process. They are not the versions of record or the final published versions. They should not be cited or distributed as the published version of this manuscript.

BMJ Open is an open access journal and the full, final, typeset and author-corrected version of record of the manuscript is available on our site with no access controls, subscription charges or pay-per-view fees (<http://bmjopen.bmj.com>).

If you have any questions on BMJ Open's open peer review process please email [info.bmjopen@bmj.com](mailto:info.bmjopen@bmj.com)

# BMJ Open

## Effect of household relocation on child vaccination and health service utilization in Dhaka, Bangladesh: a cross-sectional community survey

|                               |                                                                                                                                                                                                                                                                                                                                                                                                                                                   |
|-------------------------------|---------------------------------------------------------------------------------------------------------------------------------------------------------------------------------------------------------------------------------------------------------------------------------------------------------------------------------------------------------------------------------------------------------------------------------------------------|
| Journal:                      | <i>BMJ Open</i>                                                                                                                                                                                                                                                                                                                                                                                                                                   |
| Manuscript ID                 | bmjopen-2018-026176                                                                                                                                                                                                                                                                                                                                                                                                                               |
| Article Type:                 | Research                                                                                                                                                                                                                                                                                                                                                                                                                                          |
| Date Submitted by the Author: | 21-Aug-2018                                                                                                                                                                                                                                                                                                                                                                                                                                       |
| Complete List of Authors:     | Horng, Lily; Stanford University, Infectious Diseases and Geographic Medicine<br>Kakoly, Nadira Sultana; International Centre for Diarrheal Disease Research, Bangladesh (icddr, b)<br>Abedin, Jaynal ; International Centre for Diarrheal Disease Research, Bangladesh (icddr, b)<br>Luby, Stephen; Stanford University, Infectious Diseases and Geographic Medicine; International Centre for Diarrheal Disease Research, Bangladesh (icddr, b) |
| Keywords:                     | Community child health < PAEDIATRICS, PUBLIC HEALTH, Public health < INFECTIOUS DISEASES, Paediatric infectious disease & immunisation < PAEDIATRICS, EPIDEMIOLOGY                                                                                                                                                                                                                                                                                |
|                               |                                                                                                                                                                                                                                                                                                                                                                                                                                                   |

SCHOLARONE™  
Manuscripts

1  
2  
3  
4  
5  
6  
7 **Effect of household relocation on child vaccination and health service utilization in**  
8 **Dhaka, Bangladesh: a cross-sectional community survey**  
9

10  
11  
12 Lily M. Horng<sup>1\*</sup>, Nadira K. Sultana<sup>2</sup>, Jaynal Abedin<sup>2</sup>, Stephen P. Luby<sup>1,2</sup>

13  
14 1 Division of Infectious Diseases & Geographic Medicine, Department of Medicine, Stanford  
15 University, Stanford, California, 94305, USA

16  
17  
18 2 International Centre for Diarrheal Disease Research, Bangladesh (icddr, b), Dhaka 1000,  
19 Bangladesh  
20  
21

22  
23  
24 \*Corresponding author:

25  
26 Lily M. Horng, MD MPH

27  
28 Division of Infectious Diseases and Geographic Medicine,  
29 Stanford University, Stanford, California, 94305, USA

30  
31 +16507212730

32  
33 lhorng@stanford.edu  
34  
35

36  
37  
38 Word count (excluding title page, abstract, references, figures and tables): 3,314 words  
39  
40  
41  
42  
43  
44  
45  
46  
47  
48  
49  
50  
51  
52  
53  
54  
55

## Abstract

**Objective** To explore the relationship between household relocation and use of vaccination and health services for severe acute respiratory illness (ARI) among children in Dhaka, Bangladesh.

**Design** Analysis of cross-sectional community survey data from a prior study examining the impact of *Haemophilus influenzae* type b vaccine introduction in 2009 on meningitis incidence in Bangladesh.

**Setting** Communities surrounding two large pediatric hospitals in Dhaka, Bangladesh.

**Participants** Households with children under 5 years old who either recently relocated  $\leq$  12 months or who were residentially stable living  $\geq$  24 months in their current residence (total n = 10,720) were selected for this study.

**Primary outcome measures** Full vaccination coverage among 9-59 month old children and visits to a qualified medical provider for severe ARI among children under 5 years old.

**Results** Using vaccination cards with maternal recall, full vaccination was 80% among recently relocated children (n=3,795) and 85% among residentially stable children (n=4,713) ( $p < 0.001$ ). Among children with ARI in the prior year, 69% of recently relocated children (n=695) had visited a qualified provider compared to 82% of residentially stable children (n=763;  $p < 0.001$ ). After adjusting for demographic and socioeconomic characteristics, recently relocated children were less likely to be fully vaccinated (prevalence ratio [PR] 0.97; 95% confidence interval [CI] 0.95-0.99;  $p = 0.016$ ) and to have visited a qualified provider for ARI (PR 0.88; 95% CI 0.84-0.93;  $p < 0.001$ ).

**Conclusions** Children in recently relocated households in Dhaka, Bangladesh have decreased use of vaccination and qualified health services for severe acute respiratory illnesses.

## Strengths and limitations of this study

- This study examined a rich dataset from prior community surveys in Dhaka, Bangladesh to explore associations between household relocation and utilization of vaccination and qualified child health services.
- Vaccination was evaluated using different measurements and age ranges to explore trends in the relationship between mobility and vaccination.
- Effect of household relocation on use of child health services was found even after adjusting for socioeconomic factors known to impact health-seeking behavior.
- Limitations include lack of detailed data on mobility patterns and costs of health services.

## Introduction

Pneumonia or acute respiratory illness (ARI) is the leading cause of death globally in children under 5 years old and caused an estimated 703,000 deaths in 2015.[1] Many causes of ARI are preventable by vaccines such as *Streptococcus pneumoniae* (attributed to 56% of global pneumonia child deaths) and *Haemophilus influenzae* type b (Hib) (8% of deaths).[1] Rapid urbanization is leading to dramatic population growth, with estimated increase of 2.6 billion people in cities by 2050 and 90% of growth projected to occur in Asia and Africa.[2] Urbanization is fueling growth of slums in which residents lack reliable access to housing, clean water, sanitation, education, and health services.[3,4] A 2006 United Nations report highlights that immunization coverage in Niger was only 35% in slums compared to 86% in non-slum urban areas.[5] In Kenya, mortality estimates from 2008-2012 for children under 5 years old were 79.8 deaths per 1,000 in Nairobi slums versus 63.4 per 1,000 in non-slum areas.[6] Multiple factors contribute to poor health in slums including contaminated environments and lack of access to appropriate services.[5,7]

Residential mobility has been recognized as an important contributor to healthcare use in high-income countries, with relocation associated with decreased use of preventive and curative services.[4,8,9] One study using a 1998 United States national health survey found that duration, distance, and frequency of moving were all predictors of decreased use of child health services even after accounting for sociodemographic factors. Households who had moved within 12 months accessed fewer preventive child health services compared to households living in their current residence over 36 months (odds ratio 3.1, 95% confidence interval [CI] 2.5-3.7).[9] Recently relocated households also accessed fewer curative services (odds ratio 3.3, 95% CI 2.6-4.2).[9] Recent migrants are often poorer, less educated, and less connected to local services.[3,4,10-13] Frequent moving also impacts children's long-term cognitive function and behavioral problems into adulthood.[14]

Few studies examine mobility and healthcare utilization in low- and middle-income countries despite high population relevance: approximately 43% of urban residents in middle-

1  
2  
3 income countries and 78% in low-income countries live in slums.[2,3,8,15,16] One study  
4 examining Nigeria's 2003 Demographic and Health Survey found only 9% of rural-to-urban  
5 migrant children over 12 months old were fully immunized compared to 15% of urban non-  
6 migrant children and 24% of rural non-migrant children.[16] Receipt of first dose of  
7 diphtheria, pertussis, and tetanus (DPT) vaccine recommended at 6 weeks of age was only  
8 24% in rural-urban migrant children as compared to 47% in urban non-migrant and 63% in  
9 rural non-migrant children.[16] This association between migration and vaccination could be  
10 explained in part by socioeconomic factors as well as maternal healthcare utilization.[16]

11  
12  
13  
14  
15  
16  
17  
18 Studying urban health services in Bangladesh is useful because Bangladesh is the  
19 world's most densely populated country that is not a city-state: the population of the capital  
20 Dhaka will increase from an estimated 16 to 27 million by 2030.[2,17] Furthermore, the  
21 government has a strong national Expanded Programme on Immunization (EPI) and active  
22 health systems research.[17,18] In 2011, full vaccination rates among children age 12-23  
23 months were 80% nationally in Bangladesh, 75% in Dhaka, but only 43-67% in Dhaka  
24 slums.[17-21] Prior studies found that household turnover was as high as 50% in one year,  
25 comprehensive provider-led vaccination interventions were effective but too expensive to  
26 sustain, and street children were very hard to reach with interventions in Dhaka.[19,22,23]

27  
28  
29  
30  
31  
32  
33  
34  
35  
36  
37 To explore the relationship between residential mobility and healthcare utilization in  
38 Dhaka, we used data from a study showing Hib vaccine introduction into Bangladesh's EPI in  
39 2009 dramatically reduced rates of Hib meningitis and purulent meningitis in children.[24]  
40 We conducted secondary analysis of the Hib impact study's community survey data to  
41 determine whether recently relocated children were: 1) less likely to be fully vaccinated per  
42 EPI guidelines and 2) less likely to use qualified health services for severe acute respiratory  
43 illness than residentially stable children.  
44  
45  
46  
47  
48  
49  
50  
51

## 52 Methods

53  
54  
55  
56  
57  
58  
59  
60

### Study design and setting

Hib conjugate vaccine was introduced into Bangladesh's EPI in 2009, and the Hib impact study conducted pre and post-vaccine surveillance of meningitis in children under 5 years old using hospital records and community surveys surrounding two large pediatric hospitals in Dhaka: Dhaka Shishu and Shishu Shastya Foundation Hospital.[24] Field researchers consecutively enrolled 100 children discharged with a diagnosis of meningitis and/or encephalitis from the two study hospitals, visited households, and recorded household geographical positional system coordinates. The catchment area was defined as the area containing >80% of households with children discharged with meningitis and within one hour of transport to either hospital. Field teams divided the catchment area into 1,748 equal-sized rectangles and randomly selected 100 rectangles as clusters. Teams surveyed each household with a child under 5 years old within 98 clusters. Two clusters were within a military cantonment, thus inaccessible. Households were asked about: 1) routine vaccinations using EPI cards and maternal recall and 2) healthcare use for children with illnesses in the prior 12 months suggestive of meningitis defined as fever plus altered mental status. Data were collected one year before (2008) and after (2010) Hib vaccine introduction.

### Study population

We used the Hib impact study's pre-vaccine community surveillance data and included children based on mobility status: 1) children living in their current residence  $\leq 12$  months who we classified as "recently relocated" and 2) children living  $\geq 24$  months in their current residence who we classified as "residentially stable". We excluded children living in their current residence 13-23 months who we classified as "intermediately mobile".

### Study outcomes



Our two primary outcomes focused on healthcare utilization: 1) full vaccination among 9-59 month old children and 2) visit to a qualified medical provider among children under 5 years old who had severe acute respiratory illness symptoms within the prior 12 months. We defined full vaccination per Bangladesh EPI guidelines in 2008 (before Hib vaccine): 1 dose of Bacillus Calmette-Guérin (BCG) vaccine against tuberculosis; 3 doses of combined vaccine against diphtheria, pertussis, and tetanus (DPT); 3 doses of oral polio vaccine (excluding polio vaccine given at birth); and 1 dose of measles vaccine. We defined severe acute respiratory illness as cough or difficulty breathing plus any danger sign: stridor, chest in-drawing, difficulty drinking/ breastfeeding, vomiting, cyanosis, convulsions, lethargy, or unconsciousness. We defined a qualified medical provider as having a Bachelor of Medicine degree or higher.

### Data analysis

We compared sociodemographic and health characteristics between residentially stable and recently relocated households. For continuous variables, we calculated means with standard errors and t-tests adjusting for cluster. For categorical variables, we calculated percentages and  $\chi^2$ -tests. To construct a wealth index, we used polychoric principal components analysis (PCA) including: housing (number of rooms; free, rental, or owned housing; main material of roof, walls, and floors), cooking fuel, drinking water, sanitation, and mobile phone ownership.[25–27] We then divided households into wealth quintiles. We did not include durable assets such as furniture items because ownership of these goods could be associated with duration of residency.

To examine the magnitude of association between mobility and study outcomes of vaccination and visit to a qualified provider for severe ARI, we used modified Poisson regression adjusting for cluster to estimate prevalence ratios (PRs). We conducted univariate analyses to estimate individual effects of mobility, demographics, socioeconomics, and health services knowledge (i.e. knowledge of local hospital) on healthcare utilization. Missing data

1  
2  
3 regarding main study outcome of acute respiratory illness were handled through listwise  
4 deletion. Given large number of missing EPI cards, we analyzed vaccination in two ways: 1)  
5 using EPI cards plus maternal recall and 2) using EPI cards alone. We conducted multivariate  
6 analyses examining the association between mobility and healthcare utilization, adjusting for  
7 demographics and socioeconomics known to influence health-seeking behavior.[7,10,11,13]  
8  
9  
10  
11  
12  
13  
14

## 15 **Ethics**

16  
17  
18 The Ethical Review Committee of the International Centre for Diarrhoeal Disease  
19 Research, Bangladesh (icddr,b) reviewed and approved the study protocol. Written informed  
20 consent was obtained from all participants before taking part in the initial Hib impact study.  
21  
22  
23  
24  
25

## 26 **Patient and public involvement**

27  
28 No participants were directly involved in development of the research questions and  
29 outcomes. No participants were involved in the design or conduct of the study. There are no  
30 plans to disseminate the results of the research individually to study participants.  
31  
32  
33  
34  
35

## 36 **Results**

37  
38 We surveyed a total of 10,720 households with children less than 5 years old: 42% of  
39 households had recently relocated within 12 months, 51% were residentially stable living in  
40 their current residence over 24 months, and 7% were intermediately mobile (Figure 1). We  
41 excluded the 700 intermediately mobile children from subsequent analyses. For the healthcare  
42 utilization analysis, 1,458 children had severe ARI symptoms within the 12 months prior to  
43 survey. For the vaccination analysis, 8,508 children were age 9-59 months and thus should  
44 have completed all EPI-recommended vaccinations.  
45  
46  
47  
48  
49  
50  
51

52 Recently relocated families had smaller households, less education, less wealth, and  
53 less knowledge of the local hospital compared to residentially stable families (Table 1).  
54  
55

1  
2  
3 Recently relocated families were poorer: 24% earned less than 5,000 Bangladeshi taka (US  
4 \$73) per month compared to 18% of residentially stable families. Household income was  
5 missing for 12 out of 10,020 households. For the wealth index analysis, the first principal  
6 component accounted for 51% of overall variance, with largest contributions from roof and  
7 floor materials, sanitation, and mobile phone ownership (Supplemental Table 1). Among  
8 recently relocated families, 48% were in the two poorest wealth quintiles compared to 37% of  
9 residentially stable families. Fewer recently relocated caregivers had knowledge of the local  
10 hospital, 76%, compared to residentially stable caregivers, 85%. Similar rates of illness in the  
11 12 months prior to survey were reported by all households: 14-15% of children with  
12 symptoms of severe ARI and 3-4% with symptoms of meningitis/encephalitis.  
13  
14  
15  
16  
17  
18  
19  
20  
21

22 Full vaccination coverage measured by EPI card plus maternal recall was 83% among  
23 all children age 9-59 months (Table 2). Full vaccination was 80% among recently relocated  
24 children and 85% among residentially stable children (univariate PR 0.94, 95% CI 0.91-0.97,  
25  $p < 0.001$ ). Vaccination was lower in households with more children and younger children.  
26 Socioeconomic factors, especially mother's education, had the strongest association with  
27 vaccination. In multivariate analyses, recently relocated children were 3% less likely than  
28 residentially stable children to be fully vaccinated even after adjusting for demographic and  
29 socioeconomic factors (multivariate PR 0.97, 95% CI 0.95-0.99,  $p = 0.016$ ).  
30  
31  
32  
33  
34  
35  
36  
37

38 Vaccination was also analyzed using only EPI cards (Table 3). At time of survey,  
39 only 43% of all children had EPI cards available. Fewer recently relocated children had EPI  
40 cards, 36%, compared to 48% of residentially stable children ( $p < 0.001$ ). Full vaccination per  
41 EPI card was 83% among recently relocated children and 86% among residentially stable  
42 children ( $p = 0.083$ ). The 9-59 month age range for full vaccination analysis allowed inclusion  
43 of a larger sample size of children vulnerable to vaccine-preventable diseases. Narrowing the  
44 age range to 9-23 months showed similar results although with smaller sample sizes limiting  
45 statistical power to detect mobility-vaccination associations (Supplementary Tables 2 and 3).  
46  
47  
48  
49  
50  
51  
52  
53  
54  
55

1  
2  
3 In addition, using a 10-month age minimum to account for potential delay in measles  
4 vaccination showed the same results as a 9-month age cutoff (data not shown).  
5

6  
7 Among all children under 5 years old with severe ARI in the past year, 75% visited a  
8 qualified medical provider (Table 4). Fewer recently relocated children with severe ARI saw  
9 a qualified provider, 69%, as compared to 82% of residentially stable children (univariate PR  
10 0.84, 95% CI 0.79-0.90,  $p < 0.001$ ). Socioeconomic factors, especially household wealth, were  
11 strongly associated with qualified provider visits.  
12  
13  
14  
15

16  
17 Health services knowledge was also strongly associated with acute healthcare visits:  
18 80% of parents who knew about the local hospital sought ARI treatment from a qualified  
19 provider as compared to 51% of parents who did *not* have knowledge of the local hospital  
20 (univariate PR 1.57, 95% CI 1.34-1.85,  $p < 0.001$ ). After adjusting for demographic and  
21 socioeconomic factors, recently relocated households were 11% less likely than residentially  
22 stable households to visit a qualified medical provider for children with severe ARI  
23 (multivariate PR 0.88, 95% CI 0.84-0.93,  $p < 0.001$ ).  
24  
25  
26  
27  
28  
29  
30  
31

## 32 Discussion

33  
34  
35 Recently relocated households were less likely to use both acute and preventive child  
36 healthcare services in our study in Dhaka, Bangladesh, and these findings support prior  
37 literature exploring the effects of mobility on healthcare utilization.[8,9,14,16] Household  
38 relocation had a strong association with decreased use of qualified medical services for severe  
39 acute respiratory illness. Similarly, household relocation was associated with decreased  
40 vaccination rates although this relationship was less robust. Another key finding was that  
41 recently relocated parents were less knowledgeable about the local hospital compared to  
42 residentially stable parents, and knowledge of the local hospital had as strong an association  
43 with acute healthcare visits as some economic factors. Overall, recently relocated children in  
44 our study had slightly lower vaccination rates and markedly lower use of acute healthcare  
45 services for ARI than residentially stable children.  
46  
47  
48  
49  
50  
51  
52  
53  
54  
55

1  
2  
3 Study strengths include data focused on urban Bangladesh and exploring vaccination  
4 status using different measurements as well as adjusting for socioeconomic factors when  
5 examining mobility and health service utilization. Our study used the Hib impact study's  
6 rigorous community surveillance data of households living close to tertiary care pediatric  
7 hospitals in Dhaka. Dhaka residents have high mobility and many options for healthcare.  
8 Unlike in rural areas, physical access to health services is usually *not* a barrier to healthcare  
9 use in urban areas. One study found almost all residents in Dhaka lived within 1 kilometer of  
10 primary health services.[28] Routine immunizations are provided free by the government of  
11 Bangladesh, but acute care services require out of pocket expenditures which can be a barrier  
12 to access. Our findings on mobility and child health services use in Dhaka could inform  
13 health services work in other urban low- and middle-income country contexts.[2,6,7]

14  
15 We analyzed vaccination using EPI card data augmented with maternal recall, EPI  
16 card data only, and several different age ranges. Vaccination status can be difficult to measure  
17 in community surveys. Written documentation of vaccination is objective and easy to  
18 measure, but EPI card retention can be affected by parental education, household wealth, age  
19 of child, and even household relocation. Although maternal recall can be influenced by  
20 education, social desirability bias, and vaccine-specific knowledge, studies in low- and  
21 middle-income countries show high correlation between maternal recall and EPI cards.[29–  
22 31] Using only EPI cards or narrower age ranges in our vaccination analyses resulted in  
23 smaller sample sizes which limited statistical power, but all analyses showed similar effect  
24 estimates of increased mobility associated with decreased vaccination. Moreover, the  
25 association between increased household relocation and decreased health services use was  
26 still seen even after adjusting for socioeconomic factors known to impact healthcare use.

27  
28 Study limitations include lack of data on mobility patterns and health services costs.  
29 Information on households' prior residences, distances moved, or frequency of moving was  
30 not available in our dataset. Households moving from rural Bangladesh to urban Dhaka,  
31 moving long distances, or relocating frequently probably have less knowledge and therefore

1  
2  
3 use of locally available health services.[9] Our findings thus likely underestimate the  
4  
5 association between mobility and healthcare utilization for households with large migration  
6  
7 changes. We were also unable to examine household relocation timing in relation to  
8  
9 healthcare use. Recently relocated households were not asked if healthcare visits occurred  
10  
11 before or after moving. Healthcare visits before moving would not be relevant to how  
12  
13 mobility affects use of health services after moving. Our findings likely underestimate the  
14  
15 association between mobility and health-seeking behavior. Ultimately, our results show a  
16  
17 modest overall association between mobility and healthcare use which could be elucidated by  
18  
19 asking about migration patterns including timing of use of health services.

20  
21 Our dataset did not contain cost of services, which is a well-known barrier to  
22  
23 healthcare use.[11,20,21] Although vaccinations are provided for free, some non-  
24  
25 governmental and private organizations charge fees for patient registration. Even small fees  
26  
27 could have lowered vaccination rates. Cost of services, willingness to pay, and underlying  
28  
29 finances are strongly linked, thus adjusting for socioeconomic factors of parental education  
30  
31 and wealth in our models should have incorporated some cost effects on healthcare use.  
32  
33 However, costs could affect recently relocated households disproportionately more than  
34  
35 residentially stable households of the same socioeconomic status. One could hypothesize that  
36  
37 immediately after relocating, families would first spend money on household goods before  
38  
39 preventive medicine fees. Without cost data, we can still conclude from our analysis that  
40  
41 increased mobility is associated with decreased healthcare use, but we have limited  
42  
43 understanding of mechanisms through which mobility affects healthcare use.

44  
45 Barriers and delays to using appropriate healthcare services increase mortality.[11,32]  
46  
47 One study in India of 290 children hospitalized for pneumonia in a tertiary care center found  
48  
49 that delayed hospital referral, defined as three or more days between symptom onset and  
50  
51 hospitalization, was associated with increased mortality (OR 52.1, 95% CI 6.7-402.4,  
52  
53  $p < 0.001$ ) after adjusting for age, residence in slum, and illness severity.[32] In this study,  
54  
55 incomplete immunization was also associated with increased mortality (OR 12.3, 95% CI 2.2-

1  
2  
3 69.9,  $p=0.005$ ).[32] Reasons for delayed care-seeking can include access and cost. While cost  
4 does influence healthcare use, parents of sick children usually do seek some treatment. In the  
5 2014 Bangladesh Demographic and Health Survey, 52% of urban parents with children with  
6 ARI symptoms in the 2 weeks prior to survey sought treatment from a health facility, 23%  
7 went to pharmacies, and 12% went to traditional practitioners.[33] Only 12% of parents with  
8 sick children sought no health care treatment at all.[33] While cost does not seem a large  
9 barrier to seeking any treatment at all, cost likely influences choice of health provider.  
10  
11  
12  
13  
14  
15

16 Household relocation disrupts prior relationships with healthcare providers and  
17 results in lack of familiarity with local services. Studies show that continuity of care is  
18 associated with increased vaccination, fewer emergency department visits, and decreased  
19 hospitalization among children.[9,34–36] People usually move to new areas because of pre-  
20 existing social connections through family, friends, or work.[4,37] These social contacts can  
21 act as pathways of important local knowledge, including health services, but recently  
22 relocated households have fewer social contacts and access fewer information sources. Other  
23 studies have also found that parental attitudes and knowledge are critical factors contributing  
24 to use of health services.[38–40] One literature review found that *practical* knowledge about  
25 vaccination schedule, timing, and logistics had a stronger association with vaccination uptake  
26 than scientific knowledge of vaccine names or biologic actions.[40]  
27  
28  
29  
30  
31  
32  
33  
34  
35  
36  
37

38 Our finding that recently relocated children in Dhaka use fewer qualified health  
39 services compared to residentially stable children sheds light on health barriers faced by a  
40 growing population of children living in urban centers of low- and middle-income countries.  
41 Policymakers working to improve urban child health could invest in accurate counting of  
42 children living in communities with high household turnover in order to connect recently  
43 relocated households to already existing local health services. Further studies by researchers  
44 on patterns and mechanisms through which mobility affects healthcare use could inform  
45 critical intervention points. Ultimately, cost-effective and targeted interventions to increase  
46  
47  
48  
49  
50  
51  
52  
53  
54  
55  
56  
57  
58  
59  
60

1  
2  
3 appropriate healthcare use among recently relocated children could improve health of future  
4  
5 urban populations.  
6  
7

### 8 9 **Contributors**

10 SL was the Principal Investigator and involved in every aspect of the study from  
11 conceptualization to data analysis to manuscript writing and submission. NS, JA, and LH  
12 were involved in data analysis, and LH drafted the written work. All authors collaborated on  
13 and approved the final manuscript.  
14  
15  
16  
17

### 18 19 20 **Competing interests**

21 None declared.  
22  
23  
24  
25

### 26 27 **Provenance and peer review**

28 Not commissioned; externally peer reviewed.  
29  
30  
31

### 32 33 **Ethical considerations**

34 The Ethical Review Committee of the International Centre for Diarrhoeal Disease  
35 Research, Bangladesh (icddr,b) reviewed and approved the study protocol.  
36  
37  
38  
39

### 40 41 **Participant consent**

42 Written informed consent was obtained from all participants before taking part in the  
43 initial Hib impact study.  
44  
45  
46  
47

### 48 49 **Funding**

50 The original Hib impact study data collection was funded by the Bill and Melinda  
51 Gates Foundation and the GAVI Hib Initiative (GR-00580). No additional funding was  
52 provided for this study.  
53  
54  
55



**Data sharing**

Data are available by emailing the corresponding author LH at [lhong@stanford.edu](mailto:lhong@stanford.edu).

**Acknowledgements**

The authors thank study participants, field researchers, and collaborative partners of the Hib impact study who included Dhaka Shishu microbiology laboratories and the Johns Hopkins Bloomberg School of Public Health. icddr,b is grateful to the Bangladesh, Canada, Sweden and the United Kingdom governments for providing core/unrestricted support.

## References

- 1 Wang H, Naghavi M, Allen C, *et al*. Global, regional, and national life expectancy, all-cause mortality, and cause-specific mortality for 249 causes of death, 1980–2015: a systematic analysis for the Global Burden of Disease Study 2015. *Lancet* 2016;**388**:1459–544.
- 2 United Nations, Department of Economic and Social Affairs, Population Division. World Urbanization Prospects: The 2014 Revision. New York: 2014. <http://esa.un.org/unpd/wup/Publications/Files/WUP2014-Report.pdf> (accessed 3 Feb 2016).
- 3 United Nations Human Settlements Programme. The challenge of slums: global report on human settlements 2003. *UN-HABITAT* 2003.
- 4 Rashid SF. Strategies to reduce exclusion among populations living in urban slum settlements in Bangladesh. *J Health Popul Nutr* 2009;**27**:574–86.
- 5 Habitat UN. State of the World's Cities 2006/7. *New York: United Nations* 2006.
- 6 African Population and Health Research Center (APHRC). Population and health dynamics in Nairobi's informal settlements: report of the Nairobi Cross-sectional Slums Survey (NCSS) 2012. Nairobi: : African Population and Health Research Center (APHRC) 2014.
- 7 Unger A. Children's health in slum settings. *Arch Dis Child* 2013;**98**:799–805. doi:10.1136/archdischild-2011-301621
- 8 Jelleyman T, Spencer N. Residential mobility in childhood and health outcomes: a systematic review. *J Epidemiol Community Health* 2008;**62**:584–92.
- 9 Fowler MG, Simpson GA, Schoendorf KC. Families on the move and children's health care. *Pediatrics* 1993;**91**:934–40.
- 10 Quaiyum MA, Gazi R, Khan AI, *et al*. Programmatic aspects of dropouts in child vaccination in Bangladesh: findings from a prospective study. *Asia Pac J Public Health* 2011;**23**:141–50. doi:10.1177/1010539509342119
- 11 Hussain A, Ali SM, Kvåle G. Determinants of mortality among children in the urban slums of Dhaka city, Bangladesh. *Trop Med Int Health* 1999;**4**:758–64.
- 12 Awoh AB, Plugge E. Immunisation coverage in rural–urban migrant children in low and middle-income countries (LMICs): a systematic review and meta-analysis. *J Epidemiol Community Health* 2016;**70**:305–11.
- 13 Kusuma YS, Kumari R, Pandav CS, *et al*. Migration and immunization: determinants of childhood immunization uptake among socioeconomically disadvantaged migrants in Delhi, India. *Trop Med Int Health* 2010;**15**:1326–32.
- 14 Wood D, Halfon N, Scarlata D, *et al*. Impact of family relocation on children's growth, development, school function, and behavior. *JAMA* 1993;**270**:1334–8.
- 15 Patel RB, Burke TF. Urbanization--an emerging humanitarian disaster. *N Engl J Med* 2009;**361**:741–3. doi:10.1056/NEJMp0810878

- 1  
2  
3 16 Antai D. Migration and child immunization in Nigeria: individual-and community-level  
4 contexts. *BMC Public Health* 2010;**10**:116.
- 5  
6 17 NIPOORT, icddr,b, MEASURE Evaluation. Bangladesh Urban Health Survey 2013 Final  
7 Report. 2015. <http://www.cpc.unc.edu/measure/resources/publications/tr-15-117>  
8 (accessed 3 Feb 2016).
- 9  
10 18 Government of Bangladesh. Bangladesh EPI coverage evaluation survey 2011, Expanded  
11 Programme on Immunization. 2011.  
12 [http://www.dghs.gov.bd/images/docs/EPI/CES%20Reports/EPI%20Coverage%20Evalua](http://www.dghs.gov.bd/images/docs/EPI/CES%20Reports/EPI%20Coverage%20Evaluation%20Survey%202011.pdf)  
13 [tion%20Survey%202011.pdf](http://www.dghs.gov.bd/images/docs/EPI/CES%20Reports/EPI%20Coverage%20Evaluation%20Survey%202011.pdf)
- 14  
15 19 Hayford K, Uddin MJ, Koehlmoos TP, *et al.* Cost and sustainability of a successful  
16 package of interventions to improve vaccination coverage for children in urban slums of  
17 Bangladesh. *Vaccine* 2014;**32**:2294–9. doi:10.1016/j.vaccine.2014.02.075
- 18  
19 20 Uddin MJ, Larson CP, Oliveras E, *et al.* Child immunization coverage in urban slums of  
20 Bangladesh: impact of an intervention package. *Health Policy Plan* 2010;**25**.  
21 doi:10.1093/heapol/czp041
- 22  
23 21 Perry H, Weierbach R, Hossain I, *et al.* Childhood immunization coverage in zone 3 of  
24 Dhaka City: the challenge of reaching impoverished households in urban Bangladesh.  
25 *Bull World Health Organ* 1998;**76**:565–73.
- 26  
27 22 Luby SP, Halder AK, Saha SK, *et al.* A low-cost approach to measure the burden of  
28 vaccine preventable diseases in urban areas. *Vaccine* 2010;**28**:4903–12.  
29 doi:10.1016/j.vaccine.2010.05.040
- 30  
31 23 Uddin MJ, Shamsuzzaman M, Horng L, *et al.* Use of mobile phones for improving  
32 vaccination coverage among children living in rural hard-to-reach areas and urban streets  
33 of Bangladesh. *Vaccine* 2016;**34**:276–83. doi:10.1016/j.vaccine.2015.11.024
- 34  
35 24 Sultana NK, Saha SK, Al-Emran HM, *et al.* Impact of introduction of the Haemophilus  
36 influenzae type b conjugate vaccine into childhood immunization on meningitis in  
37 Bangladeshi infants. *J Pediatr* 2013;**163**:S73–8.
- 38  
39 25 Vyas S, Kumaranayake L. Constructing socio-economic status indices: how to use  
40 principal components analysis. *Health Policy Plan* 2006;**21**:459–68.  
41 doi:10.1093/heapol/czl029
- 42  
43 26 Luby SP, Halder AK. Associations among handwashing indicators, wealth, and  
44 symptoms of childhood respiratory illness in urban Bangladesh. *Trop Med Int Health*  
45 2008;**13**:835–44. doi:10.1111/j.1365-3156.2008.02074.x
- 46  
47 27 Sharker MY, Nasser M, Abedin J, *et al.* The risk of misclassifying subjects within  
48 principal component based asset index. *Emerg Themes Epidemiol* 2014;**11**:6.
- 49  
50 28 Heller LR. Do slums matter? Location and early childhood preventive care choices  
51 among urban residents of Bangladesh. *Soc Sci Med* 2013;**94**.  
52 doi:10.1016/j.socscimed.2013.06.011
- 53  
54 29 Murray CJ, Shengelia B, Gupta N, *et al.* Validity of reported vaccination coverage in 45  
55 countries. *Lancet* 2003;**362**:1022–7.

- 1  
2  
3 30 Miles M, Ryman TK, Dietz V, *et al.* Validity of vaccination cards and parental recall to  
4 estimate vaccination coverage: a systematic review of the literature. *Vaccine*  
5 2013;**31**:1560–8. doi:10.1016/j.vaccine.2012.10.089
- 6  
7 31 Brown J, Monasch R, Bicego G, *et al.* *An assessment of the quality of national child*  
8 *immunization coverage estimates in population-based surveys.* MEASURE Evaluation,  
9 Carolina Population Center, University of North Carolina at Chapel Hill 2002.
- 10  
11 32 Bokade CM, Madhura AD, Bagul AS, *et al.* Predictors of mortality in children due to  
12 severe and very severe pneumonia. *Niger Med J* 2015;**56**:287.
- 13  
14 33 National Institute of Population Research and Training - NIPORT/Bangladesh, Mitra and  
15 Associates, ICF International. *Bangladesh Demographic and Health Survey 2014.* Dhaka,  
16 Bangladesh: : NIPORT, Mitra and Associates, and ICF International 2016.  
17 <http://dhsprogram.com/pubs/pdf/FR311/FR311.pdf>
- 18  
19 34 Christakis DA, Mell L, Wright JA, *et al.* The association between greater continuity of  
20 care and timely measles-mumps-rubella vaccination. *Am J Public Health* 2000;**90**:962.
- 21  
22 35 Christakis DA, Mell L, Koepsell TD, *et al.* Association of lower continuity of care with  
23 greater risk of emergency department use and hospitalization in children. *Pediatrics*  
24 2001;**107**:524–9.
- 25  
26 36 Van Walraven C, Oake N, Jennings A, *et al.* The association between continuity of care  
27 and outcomes: a systematic and critical review. *J Eval Clin Pract* 2010;**16**:947–56.
- 28  
29 37 Kuhn R. Identities in motion: Social exchange networks and rural-urban migration in  
30 Bangladesh. *Contrib Indian Sociol* 2003;**37**:311–37.
- 31  
32 38 Mills E, Jadad AR, Ross C, *et al.* Systematic review of qualitative studies exploring  
33 parental beliefs and attitudes toward childhood vaccination identifies common barriers to  
34 vaccination. *J Clin Epidemiol* 11;**58**:1081–8. doi:10.1016/j.jclinepi.2005.09.002
- 35  
36 39 Rainey JJ, Watkins M, Ryman TK, *et al.* Reasons related to non-vaccination and under-  
37 vaccination of children in low and middle income countries: findings from a systematic  
38 review of the published literature, 1999–2009. *Vaccine* 2011;**29**:8215–21.
- 39  
40 40 Favin M, Steinglass R, Fields R, *et al.* Why children are not vaccinated: a review of the  
41 grey literature. *Int Health* 2012;**4**:229–38.
- 42  
43  
44  
45  
46  
47  
48  
49  
50  
51  
52  
53  
54  
55  
56  
57  
58  
59  
60

1  
2  
3  
4  
5  
6  
7  
8  
9  
10  
11  
12  
13  
14  
15  
16  
17  
18  
19  
20  
21  
22  
23  
24  
25  
26  
27  
28  
29  
30  
31  
32  
33  
34  
35  
36  
37  
38  
39  
40  
41  
42  
43  
44  
45  
46  
47

Tables

**Table 1: Mobility status of study households with children age 0-59 months and association with demographic, socioeconomic, and health characteristics using t- and  $\chi^2$ -tests**

|                                       | Residentially stable,<br>$\geq 24$ months<br>n=5513 |           | Recently relocated,<br>$\leq 12$ months<br>n=4507 |           | p-value |
|---------------------------------------|-----------------------------------------------------|-----------|---------------------------------------------------|-----------|---------|
| <u>Demographics</u>                   | <u>mean</u>                                         | <u>SE</u> | <u>mean</u>                                       | <u>SE</u> |         |
| Number of household members           | 5.40                                                | 0.09      | 4.60                                              | 0.10      | <0.001  |
| Number of children <5yrs in household | 1.28                                                | 0.01      | 1.25                                              | 0.01      | 0.194   |
| Age of index child in months          | 30.0                                                | 0.23      | 28.7                                              | 0.25      | <0.001  |
|                                       | <u>n</u>                                            | <u>%</u>  | <u>n</u>                                          | <u>%</u>  |         |
| Sex of index child: Male              | 2478                                                | 45        | 2048                                              | 45        | 0.622   |
| <u>Socioeconomics</u>                 |                                                     |           |                                                   |           |         |
| Mother's education                    |                                                     |           |                                                   |           | <0.001  |
| No education                          | 1133                                                | 21        | 1162                                              | 26        |         |
| Some schooling                        | 1142                                                | 21        | 1176                                              | 26        |         |
| Finished secondary                    | 1849                                                | 34        | 1483                                              | 33        |         |
| > Secondary                           | 1389                                                | 25        | 686                                               | 15        |         |
| Father's education                    |                                                     |           |                                                   |           | <0.001  |
| No education                          | 1261                                                | 23        | 1139                                              | 25        |         |
| Some schooling                        | 913                                                 | 17        | 911                                               | 20        |         |
| Finished secondary                    | 1525                                                | 28        | 1372                                              | 30        |         |
| > Secondary                           | 1814                                                | 33        | 1085                                              | 24        |         |
| Occupation of household head          |                                                     |           |                                                   |           | <0.001  |
| Unemployed or other                   | 482                                                 | 9         | 232                                               | 5         |         |
| Daily labor                           | 916                                                 | 17        | 1218                                              | 27        |         |
| Shopkeeper or merchant                | 1787                                                | 32        | 1058                                              | 23        |         |
| Salaried service                      | 2328                                                | 42        | 1999                                              | 44        |         |
| Monthly household income <sup>a</sup> |                                                     |           |                                                   |           | <0.001  |
| $\leq 5,000$ taka (US \$73)           | 971                                                 | 18        | 1080                                              | 24        |         |

|                                                                                        |      |    |      |    |                  |
|----------------------------------------------------------------------------------------|------|----|------|----|------------------|
| 5,001 – 10,000 taka                                                                    | 1634 | 30 | 1925 | 43 |                  |
| > 10,000 taka (US \$145)                                                               | 2900 | 53 | 1498 | 33 |                  |
| Household wealth index <sup>b</sup>                                                    |      |    |      |    | <b>&lt;0.001</b> |
| Poorest                                                                                | 1092 | 20 | 1110 | 25 |                  |
| Lower middle                                                                           | 922  | 17 | 1021 | 23 |                  |
| Middle                                                                                 | 966f | 18 | 911  | 20 |                  |
| Upper middle                                                                           | 1455 | 26 | 1155 | 26 |                  |
| Richest                                                                                | 1078 | 20 | 310  | 7  |                  |
| <u>Health services knowledge</u>                                                       |      |    |      |    |                  |
| Knowledge of local hospital                                                            | 4709 | 85 | 3428 | 76 | <b>&lt;0.001</b> |
| <u>Health outcomes</u>                                                                 |      |    |      |    |                  |
| Severe acute respiratory illness suffered by index child within 12 months <sup>c</sup> | 763  | 14 | 695  | 15 | <b>0.026</b>     |
| Meningitis/encephalitis suffered by index child within 12 months <sup>d</sup>          | 185  | 3  | 164  | 4  | 0.443            |

<sup>a</sup>12 respondents (8 residentially stable and 4 recently relocated) did not know or did not disclose household income.

<sup>b</sup>Polychoric Principal Components Analysis was used to create a household wealth index including structural housing characteristics, cooking fuel, drinking water, and sanitation.

<sup>c</sup>One residentially stable respondent did not know if child recently had a severe acute respiratory illness.

<sup>d</sup>Three respondents did not know if child recently had a serious illness with mental status changes (2 residentially stable and 1 recently relocated).

1  
2  
3  
4  
5  
6  
7  
8  
9  
10  
11  
12  
13  
14  
15  
16  
17  
18  
19  
20  
21  
22  
23  
24  
25  
26  
27  
28  
29  
30  
31  
32  
33  
34  
35  
36  
37  
38  
39  
40  
41  
42  
43  
44  
45  
46  
47

**Table 2: Using EPI card plus maternal recall, vaccination coverage among children age 9-59 months and association with mobility status using univariate and multivariate models with modified Poisson regression**

|                                                  | Partial vaccination<br>n=1465 (17%) |           | Full vaccination <sup>a</sup><br>n=7043 (83%) |           | PR <sup>b</sup> | 95% CI             | p-value          |
|--------------------------------------------------|-------------------------------------|-----------|-----------------------------------------------|-----------|-----------------|--------------------|------------------|
| <u>Univariate analyses</u>                       |                                     |           |                                               |           |                 |                    |                  |
| Mobility status                                  | <u>n</u>                            | <u>%</u>  | <u>n</u>                                      | <u>%</u>  |                 |                    |                  |
| Residentially stable $\geq 24$ months            | 706                                 | 15        | 4007                                          | 85        | Reference       |                    |                  |
| Recently relocated $\leq 12$ months              | 759                                 | 20        | 3036                                          | 80        | <b>0.94</b>     | <b>0.91-0.97</b>   | <b>&lt;0.001</b> |
| Demographics                                     | <u>mean</u>                         | <u>SE</u> | <u>mean</u>                                   | <u>SE</u> |                 |                    |                  |
| Number of children <5yrs in household            | 1.31                                | 0.02      | 1.25                                          | 0.01      | <b>0.96</b>     | <b>0.93-0.98</b>   | <b>0.002</b>     |
| Age of index child in months                     | 32.0                                | 0.44      | 34.2                                          | 0.16      | <b>1.002</b>    | <b>1.001-1.003</b> | <b>&lt;0.001</b> |
| Socioeconomics                                   |                                     |           |                                               |           |                 |                    |                  |
| Mother's education                               | <u>n</u>                            | <u>%</u>  | <u>n</u>                                      | <u>%</u>  |                 |                    |                  |
| No education                                     | 629                                 | 31        | 1377                                          | 69        | Reference       |                    |                  |
| Some schooling                                   | 401                                 | 21        | 1540                                          | 79        | <b>1.16</b>     | <b>1.10-1.21</b>   | <b>&lt;0.001</b> |
| Finished secondary                               | 323                                 | 11        | 2513                                          | 89        | <b>1.29</b>     | <b>1.23-1.36</b>   | <b>&lt;0.001</b> |
| > Higher secondary                               | 112                                 | 6         | 1613                                          | 94        | <b>1.36</b>     | <b>1.30-1.43</b>   | <b>&lt;0.001</b> |
| Occupation of household head                     |                                     |           |                                               |           |                 |                    |                  |
| Unemployed or other                              | 106                                 | 17        | 505                                           | 83        | Reference       |                    |                  |
| Daily labor                                      | 524                                 | 29        | 1283                                          | 71        | <b>0.86</b>     | <b>0.82-0.90</b>   | <b>&lt;0.001</b> |
| Shopkeeper or merchant                           | 348                                 | 14        | 2084                                          | 86        | 1.04            | 0.99-1.08          | 0.112            |
| Salaried service                                 | 487                                 | 13        | 3171                                          | 87        | <b>1.05</b>     | <b>1.01-1.09</b>   | <b>0.029</b>     |
| Household wealth status (PCA <sup>c</sup> )      |                                     |           |                                               |           |                 |                    |                  |
| Poorest                                          | 596                                 | 32        | 1290                                          | 68        | Reference       |                    |                  |
| Lower middle                                     | 334                                 | 20        | 1298                                          | 80        | <b>1.16</b>     | <b>1.09-1.24</b>   | <b>&lt;0.001</b> |
| Middle                                           | 242                                 | 15        | 1348                                          | 85        | <b>1.24</b>     | <b>1.16-1.32</b>   | <b>&lt;0.001</b> |
| Upper middle                                     | 193                                 | 9         | 2043                                          | 91        | <b>1.34</b>     | <b>1.25-1.42</b>   | <b>&lt;0.001</b> |
| Richest                                          | 100                                 | 9         | 1064                                          | 91        | <b>1.34</b>     | <b>1.25-1.43</b>   | <b>&lt;0.001</b> |
| Health services knowledge                        |                                     |           |                                               |           |                 |                    |                  |
| Does <i>not</i> have knowledge of local hospital | 354                                 | 23        | 1218                                          | 77        | Reference       |                    |                  |
| Has knowledge of local hospital                  | 1111                                | 16        | 5825                                          | 84        | <b>1.08</b>     | <b>1.05-1.12</b>   | <b>&lt;0.001</b> |

| <u>Multivariate analyses with different models</u>                          |             |                  |                  |
|-----------------------------------------------------------------------------|-------------|------------------|------------------|
| Mobility, adjusting for demographics (# of children and age of index child) | <b>0.94</b> | <b>0.92-0.97</b> | <b>&lt;0.001</b> |
| Mobility, adjusting for socioeconomics (education, occupation, and wealth)  | <b>0.97</b> | <b>0.95-0.99</b> | <b>0.009</b>     |
| Mobility, adjusting for demographics and socioeconomics                     | <b>0.97</b> | <b>0.95-0.99</b> | <b>0.016</b>     |

<sup>a</sup>Full vaccination coverage per EPI program includes 1 dose of BCG, 3 doses of polio, 3 doses of DPT, and 1 dose of measles vaccines.

<sup>b</sup>PR, Prevalence Ratio.

<sup>c</sup>Polychoric Principal Components Analysis was used to create a household wealth index including structural housing characteristics, cooking fuel, drinking water, and sanitation.

For peer review only



**Table 3: Using EPI card only, vaccination coverage among children age 9-59 months who have EPI cards and association with mobility status using univariate and multivariate models with modified Poisson regression**

|                                                  | Partial vaccination<br>n=564 (15%) |           | Full vaccination <sup>a</sup><br>n=3085 (85%) |           | PR <sup>b</sup> | 95% CI             | p-value          |
|--------------------------------------------------|------------------------------------|-----------|-----------------------------------------------|-----------|-----------------|--------------------|------------------|
| <u>Univariate analyses</u>                       |                                    |           |                                               |           |                 |                    |                  |
| Mobility status                                  | <u>n</u>                           | <u>%</u>  | <u>n</u>                                      | <u>%</u>  |                 |                    |                  |
| Residentially stable $\geq 24$ months            | 329                                | 14        | 1948                                          | 86        | Reference       |                    |                  |
| Recently relocated $\leq 12$ months              | 235                                | 17        | 1137                                          | 83        | 0.97            | 0.93-1.00          | 0.083            |
| Demographics                                     | <u>mean</u>                        | <u>SE</u> | <u>mean</u>                                   | <u>SE</u> |                 |                    |                  |
| Number of children <5yrs in household            | 1.26                               | 0.02      | 1.24                                          | 0.01      | 0.99            | 0.96-1.02          | 0.486            |
| Age of index child in months                     | 27.1                               | 0.64      | 29.6                                          | 0.25      | <b>1.002</b>    | <b>1.001-1.003</b> | <b>0.001</b>     |
| Socioeconomics                                   |                                    |           |                                               |           |                 |                    |                  |
| Mother's education                               | <u>n</u>                           | <u>%</u>  | <u>n</u>                                      | <u>%</u>  |                 |                    |                  |
| No education                                     | 165                                | 28        | 430                                           | 72        | Reference       |                    |                  |
| Some schooling                                   | 123                                | 16        | 654                                           | 84        | <b>1.16</b>     | <b>1.09-1.24</b>   | <b>&lt;0.001</b> |
| Finished secondary                               | 186                                | 14        | 1158                                          | 86        | <b>1.19</b>     | <b>1.11-1.28</b>   | <b>&lt;0.001</b> |
| > Higher secondary                               | 90                                 | 10        | 843                                           | 90        | <b>1.25</b>     | <b>1.17-1.33</b>   | <b>&lt;0.001</b> |
| Occupation of household head                     |                                    |           |                                               |           |                 |                    |                  |
| Unemployed or other                              | 35                                 | 13        | 238                                           | 87        | Reference       |                    |                  |
| Daily labor                                      | 148                                | 26        | 413                                           | 74        | <b>0.84</b>     | <b>0.78-0.91</b>   | <b>&lt;0.001</b> |
| Shopkeeper or merchant                           | 143                                | 13        | 921                                           | 87        | 0.99            | 0.94-1.04          | 0.778            |
| Salaried service                                 | 238                                | 14        | 1513                                          | 86        | 0.99            | 0.95-1.04          | 0.704            |
| Household wealth status (PCA <sup>c</sup> )      |                                    |           |                                               |           |                 |                    |                  |
| Poorest                                          | 148                                | 27        | 401                                           | 73        | Reference       |                    |                  |
| Lower middle                                     | 131                                | 21        | 503                                           | 79        | <b>1.09</b>     | <b>1.02-1.16</b>   | <b>0.009</b>     |
| Middle                                           | 97                                 | 15        | 572                                           | 86        | <b>1.17</b>     | <b>1.09-1.26</b>   | <b>&lt;0.001</b> |
| Upper middle                                     | 110                                | 10        | 1005                                          | 90        | <b>1.23</b>     | <b>1.15-1.32</b>   | <b>&lt;0.001</b> |
| Richest                                          | 78                                 | 11        | 604                                           | 89        | <b>1.21</b>     | <b>1.13-1.30</b>   | <b>&lt;0.001</b> |
| Health services knowledge                        |                                    |           |                                               |           |                 |                    |                  |
| Does <i>not</i> have knowledge of local hospital | 101                                | 19        | 434                                           | 81        | Reference       |                    |                  |
| Has knowledge of local hospital                  | 463                                | 15        | 2651                                          | 85        | <b>1.05</b>     | <b>1.01-1.09</b>   | <b>0.025</b>     |

| <u>Multivariate analyses with different models</u>                          |      |           |       |
|-----------------------------------------------------------------------------|------|-----------|-------|
| Mobility, adjusting for demographics (# of children and age of index child) | 0.97 | 0.94-1.01 | 0.126 |
| Mobility, adjusting for socioeconomics (education, occupation, and wealth)  | 0.98 | 0.95-1.02 | 0.308 |
| Mobility, adjusting for demographics and socioeconomics                     | 0.98 | 0.95-1.02 | 0.396 |

<sup>a</sup>Full vaccination coverage per EPI program includes 1 dose of BCG, 3 doses of polio, 3 doses of DPT, and 1 dose of measles vaccines.

<sup>b</sup>PR, Prevalence Ratio.

<sup>c</sup>Polychoric Principal Components Analysis was used to create a household wealth index including structural housing characteristics, cooking fuel, drinking water, and sanitation.

For peer review only

1  
2  
3  
4  
5  
6  
7  
8  
9  
10  
11  
12  
13  
14  
15  
16  
17  
18  
19  
20  
21  
22  
23  
24  
25  
26  
27  
28  
29  
30  
31  
32  
33  
34  
35  
36  
37  
38  
39  
40  
41  
42  
43  
44  
45  
46  
47

**Table 4: Qualified provider visits for severe acute respiratory illness within prior year among children < 5 years old and association with mobility using univariate and multivariate models with modified Poisson regression**

|                                                  | No qualified provider for severe ARI <sup>a</sup><br>n=358 (25%) |           | Qualified provider for severe ARI <sup>a</sup><br>n=1100 (75%) |           | PR <sup>b</sup> | 95% CI             | p-value          |
|--------------------------------------------------|------------------------------------------------------------------|-----------|----------------------------------------------------------------|-----------|-----------------|--------------------|------------------|
| <u>Univariate analyses</u>                       |                                                                  |           |                                                                |           |                 |                    |                  |
| Mobility status                                  | <u>n</u>                                                         | <u>%</u>  | <u>n</u>                                                       | <u>%</u>  |                 |                    |                  |
| Residentially stable ≥24 months                  | 141                                                              | 18        | 622                                                            | 82        | Reference       |                    |                  |
| Recently relocated ≤12 months                    | 217                                                              | 31        | 478                                                            | 69        | <b>0.84</b>     | <b>0.79-0.90</b>   | <b>&lt;0.001</b> |
| Demographics                                     | <u>mean</u>                                                      | <u>SE</u> | <u>mean</u>                                                    | <u>SE</u> |                 |                    |                  |
| Number of children <5yrs in household            | 1.23                                                             | 0.03      | 1.25                                                           | 0.02      | 1.02            | 0.97-1.08          | 0.437            |
| Age of index child in months                     | 29.1                                                             | 0.83      | 23.7                                                           | 0.44      | <b>0.994</b>    | <b>0.992-0.996</b> | <b>&lt;0.001</b> |
| Socioeconomics                                   |                                                                  |           |                                                                |           |                 |                    |                  |
| Mother's education                               | <u>n</u>                                                         | <u>%</u>  | <u>n</u>                                                       | <u>%</u>  |                 |                    |                  |
| No education                                     | 134                                                              | 38        | 220                                                            | 62        | Reference       |                    |                  |
| Some schooling                                   | 127                                                              | 32        | 267                                                            | 68        | 1.09            | 0.96-1.23          | 0.170            |
| Finished secondary                               | 79                                                               | 16        | 425                                                            | 84        | <b>1.36</b>     | <b>1.20-1.54</b>   | <b>&lt;0.001</b> |
| > Higher secondary                               | 18                                                               | 9         | 188                                                            | 91        | <b>1.47</b>     | <b>1.30-1.66</b>   | <b>&lt;0.001</b> |
| Occupation of household head                     |                                                                  |           |                                                                |           |                 |                    |                  |
| Unemployed or other                              | 24                                                               | 23        | 82                                                             | 77        | Reference       |                    |                  |
| Daily labor                                      | 139                                                              | 36        | 244                                                            | 64        | <b>0.82</b>     | <b>0.72-0.94</b>   | <b>0.005</b>     |
| Shopkeeper or merchant                           | 89                                                               | 22        | 320                                                            | 78        | 1.01            | 0.90-1.14          | 0.848            |
| Salaried service                                 | 106                                                              | 19        | 454                                                            | 81        | 1.05            | 0.93-1.18          | 0.435            |
| Household wealth status (PCA <sup>c</sup> )      |                                                                  |           |                                                                |           |                 |                    |                  |
| Poorest                                          | 154                                                              | 40        | 228                                                            | 60        | Reference       |                    |                  |
| Lower middle                                     | 93                                                               | 30        | 220                                                            | 70        | <b>1.18</b>     | <b>1.02-1.37</b>   | <b>0.031</b>     |
| Middle                                           | 59                                                               | 21        | 220                                                            | 79        | <b>1.32</b>     | <b>1.16-1.51</b>   | <b>&lt;0.001</b> |
| Upper middle                                     | 37                                                               | 12        | 277                                                            | 88        | <b>1.48</b>     | <b>1.31-1.67</b>   | <b>&lt;0.001</b> |
| Richest                                          | 15                                                               | 9         | 155                                                            | 91        | <b>1.53</b>     | <b>1.35-1.73</b>   | <b>&lt;0.001</b> |
| Health services knowledge                        |                                                                  |           |                                                                |           |                 |                    |                  |
| Does <i>not</i> have knowledge of local hospital | 114                                                              | 49        | 118                                                            | 51        | Reference       |                    |                  |

|                                                                             |     |    |     |    |             |                  |                  |
|-----------------------------------------------------------------------------|-----|----|-----|----|-------------|------------------|------------------|
| Has knowledge of local hospital                                             | 244 | 20 | 982 | 80 | <b>1.57</b> | <b>1.34-1.85</b> | <b>&lt;0.001</b> |
| <u>Multivariate analyses with different models</u>                          |     |    |     |    |             |                  |                  |
| Mobility, adjusting for demographics (# of children and age of index child) |     |    |     |    | <b>0.84</b> | <b>0.79-0.89</b> | <b>&lt;0.001</b> |
| Mobility, adjusting for socioeconomics (education, occupation, and wealth)  |     |    |     |    | <b>0.89</b> | <b>0.84-0.94</b> | <b>&lt;0.001</b> |
| Mobility, adjusting for demographics and socioeconomics                     |     |    |     |    | <b>0.88</b> | <b>0.84-0.93</b> | <b>&lt;0.001</b> |

<sup>a</sup>ARI, Acute Respiratory Illness.

<sup>b</sup>PR, Prevalence Ratio.

<sup>c</sup>Polychoric Principal Components Analysis was used to create a household wealth index including structural housing characteristics, cooking fuel, drinking water, and sanitation.

For peer review only

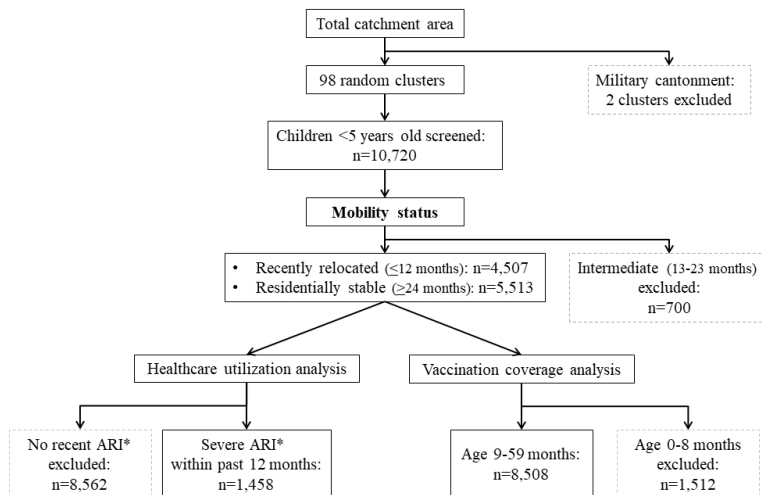

**Figure 1: Children sampled by mobility status for healthcare utilization and vaccination coverage analysis**

\*ARI = Acute Respiratory Illness

Figure 1: Children sampled by mobility status for healthcare utilization and vaccination coverage analysis

338x190mm (96 x 96 DPI)

**Effect of household relocation on child vaccination and health service utilization in Dhaka, Bangladesh:  
a cross-sectional community survey**

**SUPPLEMENTAL FIGURES AND TABLES**

**Supplemental Table 1: Household wealth principal components analysis coding and variable loading**

| <b>Indicator</b>    | <b>Coding</b>                                                                                                                                   | <b>Loading</b> |
|---------------------|-------------------------------------------------------------------------------------------------------------------------------------------------|----------------|
| Number of rooms     | Continuous                                                                                                                                      | 0.337          |
| Housing arrangement | 1 = Free<br>2 = Rental<br>3 = Owned                                                                                                             | 0.235          |
| Roof                | 1 = Natural roof (bamboo/thatch)<br>2 = Rudimentary roof (tin)<br>3 = Finished roof (cement/concrete/tiled)<br>4 = Other                        | 0.392          |
| Walls               | 1 = Natural walls (jute/bamboo/mud)<br>2 = Rudimentary walls (wood)<br>3 = Finished walls (tin/brick/cement)<br>4 = Other                       | 0.316          |
| Floor               | 1 = Natural floor (earth/bamboo)<br>2 = Rudimentary floor (wood)<br>3 = Finished floor (cement/concrete)<br>4 = Other                           | 0.377          |
| Cooking fuel        | 1 = Natural (wood/grass/dung)<br>2 = Coal/charcoal<br>3 = Kerosene<br>4 = Electricity<br>5 = Gas (liquid/biogas)<br>6 = Other                   | 0.350          |
| Drinking water      | 1 = Unimproved (unprotected/surface/bottled)<br>2 = Improved but not piped<br>3 = Improved and piped into yard or private dwelling<br>4 = Other | 0.170          |
| Sanitation          | 1 = Unimproved (open defecation/hanging/open or broken pit)<br>2 = Improved but not piped                                                       | 0.374          |

1  
2  
3  
4  
5  
6  
7  
8  
9  
10  
11  
12  
13  
14  
15  
16  
17  
18  
19  
20  
21  
22  
23  
24  
25  
26  
27  
28  
29  
30  
31  
32  
33  
34  
35  
36  
37  
38  
39  
40  
41  
42  
43  
44  
45  
46  
47

|                        |                                           |       |
|------------------------|-------------------------------------------|-------|
|                        | 3 = Improved and piped sewer<br>4 = Other |       |
| Mobile phone ownership | 0 = No<br>1 = Yes                         | 0.380 |

Note: 51% of overall variance was explained by the first component.

For peer review only

**Supplemental Table 2: Using EPI card plus maternal recall, vaccination coverage among children age 9-23 months and association with mobility status using univariate and multivariate models with modified Poisson regression**

|                                                  | Partial vaccination<br>n=518 (21%) |           | Full vaccination <sup>a</sup><br>n=1906 (79%) |           | PR <sup>b</sup> | 95% CI           | p-value          |
|--------------------------------------------------|------------------------------------|-----------|-----------------------------------------------|-----------|-----------------|------------------|------------------|
| <u>Univariate analyses</u>                       |                                    |           |                                               |           |                 |                  |                  |
| Mobility status                                  | <u>n</u>                           | <u>%</u>  | <u>n</u>                                      | <u>%</u>  |                 |                  |                  |
| Residentially stable $\geq 24$ months            | 243                                | 19        | 1053                                          | 81        | Reference       |                  |                  |
| Recently relocated $\leq 12$ months              | 275                                | 24        | 853                                           | 76        | <b>0.93</b>     | <b>0.88-0.98</b> | <b>0.009</b>     |
| Demographics                                     | <u>mean</u>                        | <u>SE</u> | <u>mean</u>                                   | <u>SE</u> |                 |                  |                  |
| Number of children <5yrs in household            | 1.31                               | 0.03      | 1.24                                          | 0.01      | <b>0.94</b>     | <b>0.89-0.99</b> | <b>0.035</b>     |
| Age of index child in months                     | 14.73                              | 0.20      | 16.35                                         | 0.11      | <b>1.02</b>     | <b>1.02-1.03</b> | <b>&lt;0.001</b> |
| Socioeconomics                                   |                                    |           |                                               |           |                 |                  |                  |
| Mother's education                               | <u>n</u>                           | <u>%</u>  | <u>n</u>                                      | <u>%</u>  |                 |                  |                  |
| No education                                     | 207                                | 41        | 303                                           | 59        | Reference       |                  |                  |
| Some schooling                                   | 121                                | 22        | 433                                           | 78        | <b>1.32</b>     | <b>1.18-1.47</b> | <b>&lt;0.001</b> |
| Finished secondary                               | 141                                | 16        | 719                                           | 84        | <b>1.41</b>     | <b>1.27-1.56</b> | <b>&lt;0.001</b> |
| > Higher secondary                               | 49                                 | 10        | 451                                           | 90        | <b>1.52</b>     | <b>1.36-1.69</b> | <b>&lt;0.001</b> |
| Occupation of household head                     |                                    |           |                                               |           |                 |                  |                  |
| Unemployed or other                              | 26                                 | 15        | 147                                           | 85        | Reference       |                  |                  |
| Daily labor                                      | 195                                | 38        | 318                                           | 62        | <b>0.73</b>     | <b>0.66-0.81</b> | <b>&lt;0.001</b> |
| Shopkeeper or merchant                           | 124                                | 19        | 538                                           | 81        | 0.96            | 0.88-1.04        | 0.287            |
| Salaried service                                 | 173                                | 16        | 903                                           | 84        | 0.99            | 0.91-1.07        | 0.752            |
| Household wealth status (PCA <sup>c</sup> )      |                                    |           |                                               |           |                 |                  |                  |
| Poorest                                          | 212                                | 40        | 321                                           | 60        | Reference       |                  |                  |
| Lower middle                                     | 114                                | 25        | 348                                           | 75        | <b>1.25</b>     | <b>1.11-1.40</b> | <b>&lt;0.001</b> |
| Middle                                           | 84                                 | 18        | 382                                           | 82        | <b>1.36</b>     | <b>1.20-1.54</b> | <b>&lt;0.001</b> |
| Upper middle                                     | 59                                 | 10        | 560                                           | 90        | <b>1.50</b>     | <b>1.34-1.69</b> | <b>&lt;0.001</b> |
| Richest                                          | 49                                 | 14        | 295                                           | 86        | <b>1.42</b>     | <b>1.26-1.61</b> | <b>&lt;0.001</b> |
| Health services knowledge                        |                                    |           |                                               |           |                 |                  |                  |
| Does <i>not</i> have knowledge of local hospital | 127                                | 28        | 324                                           | 72        | Reference       |                  |                  |
| Has knowledge of local hospital                  | 391                                | 20        | 1582                                          | 80        | <b>1.12</b>     | <b>1.05-1.19</b> | <b>&lt;0.001</b> |



1  
2  
3  
4  
5  
6  
7  
8  
9  
10  
11  
12  
13  
14  
15  
16  
17  
18  
19  
20  
21  
22  
23  
24  
25  
26  
27  
28  
29  
30  
31  
32  
33  
34  
35  
36  
37  
38  
39  
40  
41  
42  
43  
44  
45  
46  
47

| <u>Multivariate analyses with different models</u>                          |             |                  |              |
|-----------------------------------------------------------------------------|-------------|------------------|--------------|
| Mobility, adjusting for demographics (# of children and age of index child) | <b>0.93</b> | <b>0.88-0.98</b> | <b>0.007</b> |
| Mobility, adjusting for socioeconomics (education, occupation, and wealth)  | 0.96        | 0.91-1.01        | 0.136        |
| Mobility, adjusting for demographics and socioeconomics                     | 0.96        | 0.92-1.01        | 0.138        |

<sup>a</sup>Full vaccination coverage per EPI program includes 1 dose of BCG, 3 doses of polio, 3 doses of DPT, and 1 dose of measles vaccines.

<sup>b</sup>PR, Prevalence Ratio.

<sup>c</sup>Polychoric Principal Components Analysis was used to create a household wealth index including structural housing characteristics, cooking fuel, drinking water, and sanitation.

For peer review only

**Supplemental Table 3: Using EPI card only, vaccination coverage among children age 9-23 months who have EPI cards and association with mobility status using univariate and multivariate models with modified Poisson regression**

|                                                  | Partial vaccination<br>n=281 (19%) |           | Full vaccination <sup>a</sup><br>n=1222 (81%) |           | PR <sup>b</sup> | 95% CI           | p-value          |
|--------------------------------------------------|------------------------------------|-----------|-----------------------------------------------|-----------|-----------------|------------------|------------------|
| <u>Univariate analyses</u>                       |                                    |           |                                               |           |                 |                  |                  |
| Mobility status                                  | <u>n</u>                           | <u>%</u>  | <u>n</u>                                      | <u>%</u>  |                 |                  |                  |
| Residentially stable $\geq 24$ months            | 156                                | 18        | 715                                           | 82        | Reference       |                  |                  |
| Recently relocated $\leq 12$ months              | 125                                | 20        | 507                                           | 80        | 0.97            | 0.92-1.04        | 0.469            |
| Demographics                                     | <u>mean</u>                        | <u>SE</u> | <u>mean</u>                                   | <u>SE</u> |                 |                  |                  |
| Number of children <5yrs in household            | 1.23                               | 0.03      | 1.21                                          | 0.01      | 0.98            | 0.93-1.04        | 0.543            |
| Age of index child in months                     | 14.4                               | 0.27      | 15.9                                          | 0.15      | <b>1.02</b>     | <b>1.01-1.03</b> | <b>&lt;0.001</b> |
| Socioeconomics                                   |                                    |           |                                               |           |                 |                  |                  |
| Mother's education                               | <u>n</u>                           | <u>%</u>  | <u>n</u>                                      | <u>%</u>  |                 |                  |                  |
| No education                                     | 94                                 | 35        | 176                                           | 65        | Reference       |                  |                  |
| Some schooling                                   | 57                                 | 17        | 286                                           | 83        | <b>1.28</b>     | <b>1.15-1.42</b> | <b>&lt;0.001</b> |
| Finished secondary                               | 93                                 | 17        | 461                                           | 83        | <b>1.28</b>     | <b>1.14-1.43</b> | <b>&lt;0.001</b> |
| > Higher secondary                               | 37                                 | 11        | 299                                           | 89        | <b>1.37</b>     | <b>1.22-1.52</b> | <b>&lt;0.001</b> |
| Occupation of household head                     |                                    |           |                                               |           |                 |                  |                  |
| Unemployed or other                              | 14                                 | 12        | 100                                           | 88        | Reference       |                  |                  |
| Daily labor                                      | 89                                 | 33        | 184                                           | 67        | <b>0.77</b>     | <b>0.68-0.87</b> | <b>&lt;0.001</b> |
| Shopkeeper or merchant                           | 66                                 | 16        | 352                                           | 84        | 0.96            | 0.88-1.04        | 0.327            |
| Salaried service                                 | 112                                | 16        | 586                                           | 84        | 0.96            | 0.88-1.04        | 0.297            |
| Household wealth status (PCA <sup>c</sup> )      |                                    |           |                                               |           |                 |                  |                  |
| Poorest                                          | 84                                 | 32        | 179                                           | 68        | Reference       |                  |                  |
| Lower middle                                     | 67                                 | 24        | 211                                           | 76        | 1.12            | 0.99-1.25        | 0.062            |
| Middle                                           | 52                                 | 17        | 248                                           | 83        | <b>1.21</b>     | <b>1.08-1.37</b> | <b>0.002</b>     |
| Upper middle                                     | 42                                 | 10        | 381                                           | 90        | <b>1.32</b>     | <b>1.18-1.48</b> | <b>&lt;0.001</b> |
| Richest                                          | 36                                 | 15        | 203                                           | 85        | <b>1.25</b>     | <b>1.10-1.41</b> | <b>&lt;0.001</b> |
| Health services knowledge                        |                                    |           |                                               |           |                 |                  |                  |
| Does <i>not</i> have knowledge of local hospital | 55                                 | 22        | 194                                           | 78        | Reference       |                  |                  |
| Has knowledge of local hospital                  | 226                                | 18        | 1028                                          | 82        | 1.05            | 0.98-1.13        | 0.141            |

1  
2  
3  
4  
5  
6  
7  
8  
9  
10  
11  
12  
13  
14  
15  
16  
17  
18  
19  
20  
21  
22  
23  
24  
25  
26  
27  
28  
29  
30  
31  
32  
33  
34  
35  
36  
37  
38  
39  
40  
41  
42  
43  
44  
45  
46  
47

| <u>Multivariate analyses with different models</u>                          |      |           |       |
|-----------------------------------------------------------------------------|------|-----------|-------|
| Mobility, adjusting for demographics (# of children and age of index child) | 0.98 | 0.93-1.04 | 0.582 |
| Mobility, adjusting for socioeconomics (education, occupation, and wealth)  | 1.00 | 0.94-1.06 | 0.948 |
| Mobility, adjusting for demographics and socioeconomics                     | 1.00 | 0.95-1.07 | 0.888 |

<sup>a</sup>Full vaccination coverage per EPI program includes 1 dose of BCG, 3 doses of polio, 3 doses of DPT, and 1 dose of measles vaccines.

<sup>b</sup>PR, Prevalence Ratio.

<sup>c</sup>Polychoric Principal Components Analysis was used to create a household wealth index including structural housing characteristics, cooking fuel, drinking water, and sanitation.

For peer review only

## Effect of household relocation on child vaccination and health service utilization in Dhaka, Bangladesh: a cross-sectional community survey

### STROBE 2007 (v4) Statement—Checklist of items that should be included in reports of *cross-sectional studies*

| Section/Topic                | Item # | Recommendation                                                                                                                                                                       | Reported on page # |
|------------------------------|--------|--------------------------------------------------------------------------------------------------------------------------------------------------------------------------------------|--------------------|
| Title and abstract           | 1      | (a) Indicate the study's design with a commonly used term in the title or the abstract                                                                                               | 1                  |
|                              |        | (b) Provide in the abstract an informative and balanced summary of what was done and what was found                                                                                  | 2                  |
| <b>Introduction</b>          |        |                                                                                                                                                                                      |                    |
| Background/rationale         | 2      | Explain the scientific background and rationale for the investigation being reported                                                                                                 | 4                  |
| Objectives                   | 3      | State specific objectives, including any prespecified hypotheses                                                                                                                     | 4                  |
| <b>Methods</b>               |        |                                                                                                                                                                                      |                    |
| Study design                 | 4      | Present key elements of study design early in the paper                                                                                                                              | 5                  |
| Setting                      | 5      | Describe the setting, locations, and relevant dates, including periods of recruitment, exposure, follow-up, and data collection                                                      | 5                  |
| Participants                 | 6      | (a) Give the eligibility criteria, and the sources and methods of selection of participants                                                                                          | 5                  |
| Variables                    | 7      | Clearly define all outcomes, exposures, predictors, potential confounders, and effect modifiers. Give diagnostic criteria, if applicable                                             | 7                  |
| Data sources/<br>measurement | 8*     | For each variable of interest, give sources of data and details of methods of assessment (measurement). Describe comparability of assessment methods if there is more than one group | 7                  |
| Bias                         | 9      | Describe any efforts to address potential sources of bias                                                                                                                            | 7                  |
| Study size                   | 10     | Explain how the study size was arrived at                                                                                                                                            | 6                  |
| Quantitative variables       | 11     | Explain how quantitative variables were handled in the analyses. If applicable, describe which groupings were chosen and why                                                         | 7                  |
| Statistical methods          | 12     | (a) Describe all statistical methods, including those used to control for confounding                                                                                                | 7                  |
|                              |        | (b) Describe any methods used to examine subgroups and interactions                                                                                                                  | 7                  |
|                              |        | (c) Explain how missing data were addressed                                                                                                                                          | 7                  |
|                              |        | (d) If applicable, describe analytical methods taking account of sampling strategy                                                                                                   | 7                  |

|                          |     |                                                                                                                                                                                                              |          |
|--------------------------|-----|--------------------------------------------------------------------------------------------------------------------------------------------------------------------------------------------------------------|----------|
|                          |     | (e) Describe any sensitivity analyses                                                                                                                                                                        | 8        |
| <b>Results</b>           |     |                                                                                                                                                                                                              |          |
| Participants             | 13* | (a) Report numbers of individuals at each stage of study—eg numbers potentially eligible, examined for eligibility, confirmed eligible, included in the study, completing follow-up, and analysed            | 8        |
|                          |     | (b) Give reasons for non-participation at each stage                                                                                                                                                         | 8        |
|                          |     | (c) Consider use of a flow diagram                                                                                                                                                                           | Figure 1 |
| Descriptive data         | 14* | (a) Give characteristics of study participants (eg demographic, clinical, social) and information on exposures and potential confounders                                                                     | 8        |
|                          |     | (b) Indicate number of participants with missing data for each variable of interest                                                                                                                          | 9        |
| Outcome data             | 15* | Report numbers of outcome events or summary measures                                                                                                                                                         | 9        |
| Main results             | 16  | (a) Give unadjusted estimates and, if applicable, confounder-adjusted estimates and their precision (eg, 95% confidence interval). Make clear which confounders were adjusted for and why they were included | 9        |
|                          |     | (b) Report category boundaries when continuous variables were categorized                                                                                                                                    | 8        |
|                          |     | (c) If relevant, consider translating estimates of relative risk into absolute risk for a meaningful time period                                                                                             | n/a      |
| Other analyses           | 17  | Report other analyses done—eg analyses of subgroups and interactions, and sensitivity analyses                                                                                                               | 9        |
| <b>Discussion</b>        |     |                                                                                                                                                                                                              |          |
| Key results              | 18  | Summarise key results with reference to study objectives                                                                                                                                                     | 10       |
| Limitations              | 19  | Discuss limitations of the study, taking into account sources of potential bias or imprecision. Discuss both direction and magnitude of any potential bias                                                   | 11       |
| Interpretation           | 20  | Give a cautious overall interpretation of results considering objectives, limitations, multiplicity of analyses, results from similar studies, and other relevant evidence                                   | 12       |
| Generalisability         | 21  | Discuss the generalisability (external validity) of the study results                                                                                                                                        | 13       |
| <b>Other information</b> |     |                                                                                                                                                                                                              |          |
| Funding                  | 22  | Give the source of funding and the role of the funders for the present study and, if applicable, for the original study on which the present article is based                                                | 14       |

\*Give information separately for cases and controls in case-control studies and, if applicable, for exposed and unexposed groups in cohort and cross-sectional studies.

**Note:** An Explanation and Elaboration article discusses each checklist item and gives methodological background and published examples of transparent reporting. The STROBE checklist is best used in conjunction with this article (freely available on the Web sites of PLoS Medicine at <http://www.plosmedicine.org/>, Annals of Internal Medicine at <http://www.annals.org/>, and Epidemiology at <http://www.epidem.com/>). Information on the STROBE Initiative is available at [www.strobe-statement.org](http://www.strobe-statement.org).

1  
2  
3  
4  
5  
6  
7  
8  
9  
10  
11  
12  
13  
14  
15  
16  
17  
18  
19  
20  
21  
22  
23  
24  
25  
26  
27  
28  
29  
30  
31  
32  
33  
34  
35  
36  
37  
38  
39  
40  
41  
42  
43  
44  
45  
46  
47

For peer review only

# BMJ Open

## Effect of household relocation on child vaccination and health service utilization in Dhaka, Bangladesh: a cross-sectional community survey

|                                 |                                                                                                                                                                                                                                                                                                                                                                                                                                                   |
|---------------------------------|---------------------------------------------------------------------------------------------------------------------------------------------------------------------------------------------------------------------------------------------------------------------------------------------------------------------------------------------------------------------------------------------------------------------------------------------------|
| Journal:                        | <i>BMJ Open</i>                                                                                                                                                                                                                                                                                                                                                                                                                                   |
| Manuscript ID                   | bmjopen-2018-026176.R1                                                                                                                                                                                                                                                                                                                                                                                                                            |
| Article Type:                   | Research                                                                                                                                                                                                                                                                                                                                                                                                                                          |
| Date Submitted by the Author:   | 16-Jan-2019                                                                                                                                                                                                                                                                                                                                                                                                                                       |
| Complete List of Authors:       | Horng, Lily; Stanford University, Infectious Diseases and Geographic Medicine<br>Kakoly, Nadira Sultana; International Centre for Diarrheal Disease Research, Bangladesh (icddr, b)<br>Abedin, Jaynal ; International Centre for Diarrheal Disease Research, Bangladesh (icddr, b)<br>Luby, Stephen; Stanford University, Infectious Diseases and Geographic Medicine; International Centre for Diarrheal Disease Research, Bangladesh (icddr, b) |
| <b>Primary Subject Heading</b>: | Global health                                                                                                                                                                                                                                                                                                                                                                                                                                     |
| Secondary Subject Heading:      | Epidemiology, Paediatrics, Public health, Infectious diseases                                                                                                                                                                                                                                                                                                                                                                                     |
| Keywords:                       | Community child health < PAEDIATRICS, PUBLIC HEALTH, Public health < INFECTIOUS DISEASES, Paediatric infectious disease & immunisation < PAEDIATRICS, EPIDEMIOLOGY                                                                                                                                                                                                                                                                                |
|                                 |                                                                                                                                                                                                                                                                                                                                                                                                                                                   |

SCHOLARONE™  
Manuscripts

1

2

3

4

5

6

7

8

9

10

11

12

13

14

15

16

17

18

19

20

21

22

23

24

25

26

27

28

29

30

31

**Effect of household relocation on child vaccination and health service utilization in**

**Dhaka, Bangladesh: a cross-sectional community survey**

Lily M. Horng<sup>1\*</sup>, Nadira K. Sultana<sup>2</sup>, Jaynal Abedin<sup>2</sup>, Stephen P. Luby<sup>1,2</sup>

1 Division of Infectious Diseases & Geographic Medicine, Department of Medicine, Stanford

University, Stanford, California, 94305, USA

2 International Centre for Diarrheal Disease Research, Bangladesh (icddr, b), Dhaka 1000,

Bangladesh

\*Corresponding author:

Lily M. Horng, MD MPH

Division of Infectious Diseases and Geographic Medicine,

Stanford University, Stanford, California, 94305, USA

+16507212730

lhorng@stanford.edu

Word count (excluding title page, abstract, references, figures and tables): 4,309 words



## 1 Abstract

2 **Objective** To explore the relationship between household relocation and use of vaccination  
3 and health services for severe acute respiratory illness (ARI) among children in Dhaka,  
4 Bangladesh.

5 **Design** Analysis of cross-sectional community survey data from a prior study examining the  
6 impact of *Haemophilus influenzae* type b vaccine introduction in 2009 on meningitis  
7 incidence in Bangladesh.

8 **Setting** Communities surrounding two large pediatric hospitals in Dhaka, Bangladesh.

9 **Participants** Households with children under 5 years old who either recently relocated  $\leq 12$   
10 months or who were residentially stable living  $\geq 24$  months in their current residence (total n  
11 = 10,020) were selected for this study.

12 **Primary outcome measures** Full vaccination coverage among 9-59 month old children and  
13 visits to a qualified medical provider for severe ARI among children under 5 years old.

14 **Results** Using vaccination cards with maternal recall, full vaccination was 80% among  
15 recently relocated children (n=3,795) and 85% among residentially stable children (n=4,713;  
16  $\chi^2=37.2$ ,  $p<0.001$ ). Among children with ARI in the prior year, 69% of recently relocated  
17 children (n=695) had visited a qualified provider compared to 82% of residentially stable  
18 children (n=763;  $\chi^2=31.9$ ,  $p<0.001$ ). After adjusting for demographic and socioeconomic  
19 characteristics, recently relocated children were less likely to be fully vaccinated (prevalence  
20 ratio [PR] 0.97; 95% confidence interval [CI] 0.95-0.99;  $p=0.016$ ) and to have visited a  
21 qualified provider for ARI (PR 0.88; 95% CI 0.84-0.93;  $p<0.001$ ).

22 **Conclusions** Children in recently relocated households in Dhaka, Bangladesh have decreased  
23 use of vaccination and qualified health services for severe acute respiratory illnesses.

24

25 Strengths and limitations of this study

- 1  
2  
3 1 • This study examined a rich dataset from prior community surveys in Dhaka,  
4  
5 2 Bangladesh to explore associations between household relocation and utilization of  
6  
7 3 vaccination and qualified child health services.  
8  
9 4 • Vaccination was evaluated using different measurements and age ranges to explore  
10  
11 5 trends in the relationship between mobility and vaccination.  
12  
13 6 • Effect of household relocation on use of child health services was found even after  
14  
15 7 adjusting for socioeconomic factors known to impact health-seeking behavior.  
16  
17 8 • Limitations include lack of detailed data on mobility patterns and costs of health  
18  
19 9 services.  
20  
21  
22  
23  
24  
25  
26  
27  
28  
29  
30  
31  
32  
33  
34  
35  
36  
37  
38  
39  
40  
41  
42  
43  
44  
45  
46  
47  
48  
49  
50  
51  
52  
53  
54  
55  
56  
57  
58  
59  
60

## 1 Introduction

2 Pneumonia or acute respiratory illness (ARI) is the leading cause of death globally in  
3 children under 5 years old, and lower respiratory tract infections caused an estimated 652,572  
4 child deaths in 2016.[1] Many causes of ARI are preventable by vaccines such as  
5 *Streptococcus pneumoniae* (attributed to 52% of global pneumonia child deaths) and  
6 *Haemophilus influenzae* type b (Hib) (7% of deaths).[1] The majority of the world's  
7 population now lives in urban areas, and this population is expected to grow from 54% in  
8 2014 to 66% in 2050, an estimated increase of 2.5 billion people.[2,3] With this increase,  
9 90% of growth is projected in Asia and Africa.[3] The population living in urban slums is also  
10 expected to increase from 881 million in 2014 to 2 billion in 2030, in large part due to rural-  
11 urban migration.[2,4]

12 In many low- and middle-income countries, vaccination and childhood mortality rates  
13 among urban poor are worse than among other urban groups and even rural populations.[5,6]  
14 In addition, residents of slums have poor health outcomes due to lack of reliable access to  
15 housing, clean water, sanitation, education, and health services.[4,5,7–9] In Nigeria, a 2010  
16 study examining 2003 Demographic and Health Survey data of 6,029 children 12 months and  
17 older found full immunization among 24.3% of rural non-migrant, 15.2% of urban non-  
18 migrant, and 8.5% of rural-urban migrant children.[10] In Bangladesh, a comparison study of  
19 the 2013 Urban Health Survey and 2014 Demographic and Health Survey found under-5 child  
20 mortality rates of 46 per 1,000 livebirths nationally, 41 in Dhaka, 49 in rural areas, and 57 in  
21 urban slums.[5] One recent systematic review found community factors associated with  
22 vaccination coverage in the urban poor included socio-economic characteristics, vaccination  
23 knowledge and beliefs, access to care, and recent rural-urban migration.[6]

24 Residential mobility has been recognized as an important contributor to healthcare  
25 use in high-income countries, with relocation associated with decreased use of preventive and  
26 curative services.[11,12] One study using a 1998 United States national health survey found  
27 that duration, distance, and frequency of moving were all predictors of decreased use of child

1 health services even after accounting for sociodemographic factors. Households who had  
2 moved within 12 months accessed fewer preventive child health services compared to  
3 households living in their current residence over 36 months (odds ratio 3.1, 95% confidence  
4 interval [CI] 2.5-3.7).[12] Recently relocated households also accessed fewer curative  
5 services (odds ratio 3.3, 95% CI 2.6-4.2).[12] Frequent moving also impacted children's long-  
6 term cognitive function and behavioral problems into adulthood.[13]

7 Few studies examine mobility and healthcare utilization in low- and middle-income  
8 countries despite high population relevance: approximately 43% of urban residents in middle-  
9 income countries and 78% in low-income countries live in slums.[3,4,6,10,14,15] In the 2010  
10 Nigeria study, urban non-migrant children had 1.7 times higher odds of being fully  
11 immunized than rural-urban migrants (univariate odds ratio [OR] 1.67, 95% confidence  
12 interval [CI] 1.20-2.32).[10] This association between migration and immunization was  
13 independent of demographic factors, but was attenuated and partially explained by  
14 socioeconomic characteristics and maternal healthcare utilization in multivariable  
15 analyses.[10] In this Nigeria study, migrant status was defined as moving within 10 years.[10]  
16 A 2010 cross-sectional survey in India examined 746 rural-urban migrant mothers with  
17 children under 2 years old: 339 were 'recent' migrants who moved to Delhi within 5 years  
18 and 407 were 'settled' migrants in Delhi at least 5 years.[15] For age-appropriate children,  
19 81% of settled migrants and 64% of recent migrants were fully immunized per national  
20 guidelines.[15] Settled migrant children had 1.9 times higher odds of being fully immunized  
21 than recent migrants after adjusting for demographics, socioeconomics, and maternal  
22 healthcare utilization (adjusted OR 1.93, 95% CI 1.18-3.14).[15]

23 Studying urban health services in Bangladesh is useful because Bangladesh is the  
24 world's most densely populated country that is not a city-state: the population of the capital  
25 Dhaka will increase from an estimated 16 to 27 million by 2030.[3,16] Furthermore, the  
26 government has a strong national Expanded Programme on Immunization and active health  
27 systems research.[16,17] In 2011, full vaccination rates among children age 12-23 months

1 were 80% nationally in Bangladesh, 75% in Dhaka, but only 43-67% in Dhaka slums.[16–20]  
2  
3  
4  
5  
6  
7  
8  
9  
10  
11  
12  
13  
14  
15  
16  
17  
18  
19  
20  
21  
22  
23  
24  
25  
26  
27  
28  
29  
30  
31  
32  
33  
34  
35  
36  
37  
38  
39  
40  
41  
42  
43  
44  
45  
46  
47  
48  
49  
50  
51  
52  
53  
54  
55  
56  
57  
58  
59  
60

1  
2  
3  
4  
5  
6  
7  
8  
9  
10  
11  
12  
13  
14  
15  
16  
17  
18  
19  
20  
21  
22  
23  
24  
25  
26  
27  
28  
29  
30  
31  
32  
33  
34  
35  
36  
37  
38  
39  
40  
41  
42  
43  
44  
45  
46  
47  
48  
49  
50  
51  
52  
53  
54  
55  
56  
57  
58  
59  
60

## 14 Methods

### 15 Study design and setting

16 Hib conjugate vaccine was introduced into Bangladesh's Expanded Programme on  
17 Immunization in 2009, and the Hib impact study conducted pre and post-vaccine surveillance  
18 of meningitis in children under 5 years old using hospital records and community surveys  
19 surrounding two large pediatric hospitals in Dhaka: Dhaka Shishu and Shishu Shastya  
20 Foundation Hospital.[23] Field researchers consecutively enrolled 100 children discharged  
21 with a diagnosis of meningitis and/or encephalitis from the two study hospitals, visited  
22 households, and recorded household geographical positional system coordinates. The  
23 catchment area was defined as the area containing >80% of households with children  
24 discharged with meningitis and within one hour of transport to either hospital. Field teams  
25 divided the catchment area into 1,748 equal-sized rectangles and randomly selected 100  
26 rectangles as clusters. Teams surveyed each household with a child under 5 years old within

1  
2  
3 1 98 clusters. Two clusters were within a military cantonment, thus inaccessible. Households  
4  
5 2 were asked about: 1) routine vaccinations using vaccination cards and maternal recall and 2)  
6  
7 3 healthcare use for children with illnesses in the prior 12 months suggestive of  
8  
9 4 meningoencephalitis defined as: any serious illness with acute onset of fever with either  
10  
11 5 convulsions or unconsciousness or altered mental status.[23] Data were collected one year  
12  
13 6 before (2008) and after (2010) Hib vaccine introduction.  
14  
15  
16  
17 7

## 18 8 **Study population**

19  
20 9 We used the Hib impact study's pre-vaccine community surveillance data and  
21  
22 10 included children based on mobility status: 1) children living in their current residence  $\leq 12$   
23  
24 11 months who we classified as "recently relocated" and 2) children living  $\geq 24$  months in their  
25  
26 12 current residence who we classified as "residentially stable". This definition of  
27  
28 13 mobility/migration status has been used in prior studies.[6,12] We excluded children living in  
29  
30 14 their current residence 13-23 months who we classified as "intermediately mobile".  
31  
32  
33  
34  
35

## 36 16 **Study outcomes**

37  
38 17 Our two primary outcomes focused on healthcare utilization: 1) full vaccination  
39  
40 18 among 9-59 month old children and 2) visit to a qualified medical provider among children  
41  
42 19 under 5 years old who had severe acute respiratory illness symptoms within the prior 12  
43  
44 20 months. We defined full vaccination per Bangladesh Expanded Programme on Immunization  
45  
46 21 guidelines in 2008 (before Hib vaccine): 1 dose of Bacillus Calmette-Guérin (BCG) vaccine  
47  
48 22 against tuberculosis; 3 doses of combined vaccine against diphtheria, pertussis, and tetanus  
49  
50 23 (DPT); 3 doses of oral polio vaccine (excluding polio vaccine given at birth); and 1 dose of  
51  
52 24 measles vaccine. Government guidelines recommended children to receive all these  
53  
54 25 vaccinations before 9 months of age. Any doses of pentavalent vaccine, which includes  
55  
56 26 diphtheria, pertussis, tetanus, hepatitis B, and Hib, were included in vaccination analyses. We  
57  
58 27 defined severe acute respiratory illness as cough or difficulty breathing plus any danger sign:  
59  
60

1 stridor, chest in-drawing, difficulty drinking/ breastfeeding, vomiting, cyanosis, convulsions,  
2 lethargy, or unconsciousness. We defined a qualified medical provider as having a Bachelor  
3 of Medicine degree or higher.

## 4 5 **Data analysis**

6 We compared sociodemographic and health characteristics between residentially  
7 stable and recently relocated households. For continuous variables, we calculated means with  
8 standard errors and t-tests adjusting for cluster. For categorical variables, we calculated  
9 percentages and  $\chi^2$ -tests. To construct a wealth index, we used polychoric principal  
10 components analysis (PCA) including: housing (number of rooms; free, rental, or owned  
11 housing; main material of roof, walls, and floors), cooking fuel, drinking water, sanitation,  
12 and mobile phone ownership.[24–26] We then divided households into wealth quintiles. We  
13 did not include durable assets such as furniture items because ownership of these goods could  
14 be associated with duration of residency.

15 To examine the magnitude of association between mobility and study outcomes of  
16 vaccination and visit to a qualified provider for severe ARI, we used modified Poisson  
17 regression with robust cluster variance to estimate prevalence ratios (PRs).[27,28] We chose  
18 modified Poisson regression to model prevalence ratios for common binary outcomes because  
19 logistic regression is more applicable to rare outcomes and because log-binomial regression  
20 models may fail to converge. We conducted univariate analyses to estimate individual effects  
21 of mobility, demographics, socioeconomics, and health services knowledge (i.e. knowledge of  
22 local hospital) on healthcare utilization. Missing data regarding main study outcome of acute  
23 respiratory illness were handled through listwise deletion. Given large number of missing  
24 vaccination cards, we analyzed vaccination in two ways: 1) using vaccination cards plus  
25 maternal recall and 2) using vaccination cards alone. We conducted multivariable analyses  
26 examining the association between mobility and healthcare utilization, adjusting for  
27 demographics and socioeconomics known to influence health-seeking behavior.[9,15,29–31]

1  
2  
3 1 Regression diagnostics included checks for influential observations with Cook's distance  
4  
5 2 calculations.

6  
7  
8 3  
9  
10 4 **Ethics**

11  
12  
13 5 The Ethical Review Committee of the International Centre for Diarrhoeal Disease  
14  
15 6 Research, Bangladesh (icddr,b) reviewed and approved the study protocol. Written informed  
16  
17 7 consent was obtained from all participants before taking part in the initial Hib impact study.  
18  
19 8

20  
21  
22 9 **Patient and public involvement**

23  
24 10 No participants were directly involved in development of the research questions and  
25  
26 11 outcomes. No participants were involved in the design or conduct of the study. There are no  
27  
28 12 plans to disseminate the results of the research individually to study participants.  
29  
30 13

31  
32 14 **Results**

33  
34  
35 15 We surveyed a total of 10,720 households with children less than 5 years old: 42% of  
36  
37 16 households had recently relocated within 12 months, 51% were residentially stable living in  
38  
39 17 their current residence over 24 months, and 7% were intermediately mobile (Figure 1). We  
40  
41 18 excluded from subsequent analyses 700 children living in their current residence 13-23  
42  
43 19 months and classified as intermediately mobile. For the healthcare utilization analysis, 1,458  
44  
45 20 children had severe ARI symptoms within the 12 months prior to survey. For the vaccination  
46  
47 21 analysis, 8,508 children were age 9-59 months and thus should have completed all Expanded  
48  
49 22 Programme on Immunization-recommended vaccinations. Household demographics, parental  
50  
51 23 education, occupation, and hospital knowledge were available for all households. Missing  
52  
53 24 data included: income for 12 households, meningitis symptoms for 3 children, respiratory  
54  
55 25 illness symptoms for 1 child, and vaccination cards for 4,859 children age 9-59 months.  
56  
57  
58  
59  
60



1  
2  
3 1 Recently relocated families had smaller households, less education, less wealth, and  
4  
5 2 less knowledge of the local hospital compared to residentially stable families (Table 1).  
6  
7 3 Recently relocated families were poorer: 24% earned less than 5,000 Bangladeshi taka (US  
8  
9 4 \$73) per month compared to 18% of residentially stable families. For the wealth index  
10  
11 5 analysis, the first principal component accounted for 51% of overall variance, with largest  
12  
13 6 contributions from roof and floor materials, sanitation, and mobile phone ownership  
14  
15 7 (Supplemental Table 1). Among recently relocated families, 48% were in the two poorest  
16  
17 8 wealth quintiles compared to 37% of residentially stable families. Fewer recently relocated  
18  
19 9 caregivers had knowledge of the local hospital, 76%, compared to residentially stable  
20  
21 10 caregivers, 85% ( $\chi^2=142.3$ ,  $p<0.001$ ). Similar rates of illness in the 12 months prior to survey  
22  
23 11 were reported by all households: 14-15% of children with symptoms of severe ARI and 3-4%  
24  
25 12 with symptoms of meningitis/encephalitis.

26  
27  
28 13 Full vaccination coverage measured by vaccination card plus maternal recall was  
29  
30 14 83% among all children age 9-59 months (Table 2). Full vaccination was 80% among recently  
31  
32 15 relocated children and 85% among residentially stable children (univariate PR 0.94, 95% CI  
33  
34 16 0.91-0.97,  $p<0.001$ ). Vaccination was lower in households with more children and younger  
35  
36 17 children. Socioeconomic factors, especially mother's education, had the strongest association  
37  
38 18 with vaccination. In multivariable analyses, recently relocated children were 3% less likely  
39  
40 19 than residentially stable children to be fully vaccinated even after adjusting for demographic  
41  
42 20 and socioeconomic factors (multivariable PR 0.97, 95% CI 0.95-0.99,  $p=0.016$ ).

43  
44  
45 21 Vaccination was also analyzed using only vaccination cards (Table 3). At time of  
46  
47 22 survey, only 43% of all children had vaccination cards available. Fewer recently relocated  
48  
49 23 children had vaccination cards, 36%, compared to 48% of residentially stable children  
50  
51 24 ( $\chi^2=126.9$ ,  $p<0.001$ ). Younger children were more likely to have cards than older children:  
52  
53 25 62% of children 9-23 months old had vaccination cards as compared to 38% of children 24-59  
54  
55 26 months old ( $\chi^2=505.7$ ,  $p<0.001$ ). Full vaccination per vaccination card was 83% among  
56  
57 27 recently relocated children and 86% among residentially stable children (univariate PR 0.97,  
58  
59  
60

1  
2  
3 1 95% CI 0.93-1.00,  $p=0.083$ ). The 9-59 month age range for vaccination analysis allowed  
4  
5 2 inclusion of a larger sample size of children vulnerable to vaccine-preventable disease. In  
6  
7 3 contrast, routine vaccination schedules focus on children  $<2$  years old and full vaccination  
8  
9 4 coverage per Expanded Programme on Immunization in Bangladesh and many other countries  
10  
11 5 is defined in children up to 23 months old.[17,32] Narrowing the age range of vaccination  
12  
13 6 analysis to 9-23 months showed similar results although with smaller sample sizes limiting  
14  
15 7 statistical power to detect mobility-vaccination associations (Supplementary Tables 2 and 3).  
16  
17 8 In addition, using a 10-month age minimum to account for potential delay in measles  
18  
19 9 vaccination recommended at 9 months old showed the same results as a 9-month age cutoff  
20  
21 10 (data not shown). Checking for influential observations with Cook's distances identified no  
22  
23 11 outliers in vaccination analyses (Supplemental Figure 1).[33]

24  
25  
26 12 Among all children under 5 years old with severe ARI in the past year, 75% visited a  
27  
28 13 qualified medical provider (Table 4). Fewer recently relocated children with severe ARI saw  
29  
30 14 a qualified provider, 69%, as compared to 82% of residentially stable children (univariate PR  
31  
32 15 0.84, 95% CI 0.79-0.90,  $p<0.001$ ). Socioeconomic factors, especially household wealth, were  
33  
34 16 strongly associated with qualified provider visits.

35  
36  
37 17 Health services knowledge was also strongly associated with acute healthcare visits:  
38  
39 18 80% of parents who knew about the local hospital sought ARI treatment from a qualified  
40  
41 19 provider as compared to 51% of parents who did *not* have knowledge of the local hospital  
42  
43 20 (univariate PR 1.57, 95% CI 1.34-1.85,  $p<0.001$ ). After adjusting for demographic and  
44  
45 21 socioeconomic factors, recently relocated households were 11% less likely than residentially  
46  
47 22 stable households to visit a qualified medical provider for children with severe ARI  
48  
49 23 (multivariable PR 0.88, 95% CI 0.84-0.93,  $p<0.001$ ). One outlier was identified by Cook's  
50  
51 24 distances in healthcare utilization analyses (Supplemental Figure 1). Excluding this outlier  
52  
53 25 and using robust error variance resulted in similar results to those presented (data not shown).  
54  
55

56 26

## 57 27 Discussion

1  
2  
3 1 Recently relocated households were less likely to use both acute and preventive child  
4  
5 2 healthcare services in our study in Dhaka, Bangladesh, and these findings support prior  
6  
7 3 literature exploring the effects of mobility on healthcare utilization.[6,10–13,15] Household  
8  
9 4 relocation had a strong association with decreased use of qualified medical services for severe  
10  
11 5 acute respiratory illness. Similarly, household relocation was associated with decreased  
12  
13 6 vaccination rates although this relationship was less robust. Another key finding was that  
14  
15 7 recently relocated parents were less knowledgeable about the local hospital compared to  
16  
17 8 residentially stable parents, and knowledge of the local hospital had as strong an association  
18  
19 9 with acute healthcare visits as some economic factors. Overall, recently relocated children in  
20  
21 10 our study had slightly lower vaccination rates and markedly lower use of acute healthcare  
22  
23 11 services for ARI than residentially stable children.

24  
25  
26 12 Study strengths include data focused on urban Bangladesh and exploring vaccination  
27  
28 13 status using different measurements as well as adjusting for socioeconomic factors when  
29  
30 14 examining mobility and health service utilization. Our study used the Hib impact study's  
31  
32 15 rigorous community surveillance data of households living close to tertiary care pediatric  
33  
34 16 hospitals in Dhaka. Dhaka residents have high mobility and many options for healthcare.  
35  
36 17 Unlike in rural areas, physical access to health services is usually *not* a barrier to healthcare  
37  
38 18 use in urban areas. One study found almost all residents in Dhaka lived within 1 kilometer of  
39  
40 19 primary health services.[34] Routine immunizations are provided free by the government of  
41  
42 20 Bangladesh, but acute care services require out of pocket expenditures which can be a barrier  
43  
44 21 to access. Our findings on mobility and child health services use in Dhaka could inform  
45  
46 22 health services work in other urban low- and middle-income country contexts.[3,5]

47  
48  
49 23 We analyzed vaccination using vaccination card data augmented with maternal recall,  
50  
51 24 vaccination card data only, and several different age ranges. Accurately measuring  
52  
53 25 vaccinations in children is a known difficulty in public health programs and research studies,  
54  
55 26 especially in low- and middle-income countries where vaccination cards are frequently *not*  
56  
57 27 available. Some studies have found poor agreement between parental recall, vaccination  
58  
59  
60

1 cards, and even official health records.[35–37] By contrast, other studies have found good  
2 correlation between maternal report and vaccination cards, and maternal recall is routinely  
3 used in Demographic and Health Surveys and Multiple Indicator Cluster Surveys.[38,39]  
4 Maternal recall can overestimate or underestimate vaccination history based on education,  
5 social desirability bias, and vaccine-specific knowledge. Vaccination card retention itself can  
6 be affected by parental education, household wealth, age of child, and even household  
7 relocation. Our data showed more missing cards among recently relocated households and in  
8 older children, thus those groups are subject to more maternal recall bias. Using only  
9 vaccination cards or narrower age ranges in our vaccination analyses resulted in smaller  
10 sample sizes which limited statistical power, but all analyses showed similar effect estimates  
11 of increased mobility associated with decreased vaccination. Moreover, the association  
12 between increased household relocation and decreased health services use was still seen even  
13 after adjusting for socioeconomic factors known to impact healthcare use.

14 Study limitations include lack of data on mobility patterns and health services costs.  
15 Information on households' prior residences, distances moved, or frequency of moving was  
16 not available in our dataset. Households moving from rural Bangladesh to urban Dhaka,  
17 moving long distances, or relocating frequently probably have less knowledge and therefore  
18 use of locally available health services.[12] Several studies show that recent rural to urban  
19 migration is associated with lower vaccination coverage in children.[6,10,15] Lack of data on  
20 mobility patterns in our study precludes evaluation of how magnitude of relocation affected  
21 healthcare use. Our findings likely underestimate the negative association between mobility  
22 and healthcare utilization for households with large migration such as rural to urban migrants  
23 as compared to households with intra-Dhaka relocation where one would expect minimal  
24 change in health-seeking behavior. We were also unable to examine household relocation  
25 timing in relation to healthcare use. Recently relocated households were not asked if  
26 healthcare visits occurred before or after moving. Healthcare visits before moving would not  
27 be relevant to how mobility affects use of health services after moving. Our findings may

1 underestimate the negative association between mobility and health-seeking behavior because  
2 our data included healthcare visits before moving which were unrelated to knowledge of the  
3 new geographic area. Timing of healthcare visits in relation to acquiring knowledge of  
4 hospital services was also not available, thus there may be reverse causality of recently  
5 relocated households gaining knowledge of local providers after seeking care. Ultimately, our  
6 results show a modest overall association between mobility and healthcare use which could be  
7 elucidated by asking about migration patterns including timing of use of health services.

8 Our study results may not be as generalizable to populations in urban areas without  
9 tertiary care hospitals. Our sampling scheme focused on community catchment areas  
10 surrounding tertiary care pediatric hospitals. Advantages of this study design were that it  
11 allowed examination of healthcare utilization for severe disease since advanced services were  
12 available within a small physical distance. In addition, it was a low-cost way to examine  
13 population-level mobility instead of more resource-intensive active surveillance of migrant  
14 populations. However, use of health services generally increases with geographic proximity,  
15 and studies show this relationship is influenced by many factors including income and slum  
16 versus non-slum locations.[34,40] Recently relocated populations may be even more  
17 influenced by proximity than residentially stable populations because of fewer socioeconomic  
18 resources and lack of knowledge of health services. This would bias our results towards  
19 higher rates of health-seeking behavior among recently relocated households. Recently  
20 relocated households in areas without tertiary care services may use health services less  
21 because of transport costs and lack of knowledge of health facilities physically distant. In  
22 addition, our study included participants who relocated into the study area, but not people  
23 who left the study area. In-migrants and out-migrants may be different in their healthcare  
24 utilization patterns, which could also affect generalizability.

25 Our dataset did not contain cost of services, which is a well-known barrier to  
26 healthcare use.[19,20,30] Although vaccinations are provided for free, some non-  
27 governmental and private organizations charge fees for patient registration. Even small fees

1  
2  
3 1 could have lowered vaccination rates. Cost of services, willingness to pay, and underlying  
4  
5 2 finances are strongly linked, thus adjusting for socioeconomic factors of parental education  
6  
7 3 and wealth in our models should have incorporated some cost effects on healthcare use.  
8  
9 4 However, costs could affect recently relocated households disproportionately more than  
10  
11 5 residentially stable households of the same socioeconomic status. One could hypothesize that  
12  
13 6 immediately after relocating, families would first spend money on household goods before  
14  
15 7 preventive medicine fees. Without cost data, we can still conclude from our analysis that  
16  
17 8 increased mobility is associated with decreased healthcare use, but we have limited  
18  
19 9 understanding of mechanisms through which mobility affects healthcare use.

20  
21  
22 10 Barriers and delays to using appropriate healthcare services increase mortality.[30,41]  
23  
24 11 One study in India of 290 children hospitalized for pneumonia in a tertiary care center found  
25  
26 12 that delayed hospital referral, defined as three or more days between symptom onset and  
27  
28 13 hospitalization, was associated with increased mortality (OR 52.1, 95% CI 6.7-402.4,  
29  
30 14  $p < 0.001$ ) after adjusting for age, residence in slum, and illness severity.[41] In this study,  
31  
32 15 incomplete immunization was also associated with increased mortality (OR 12.3, 95% CI 2.2-  
33  
34 16 69.9,  $p = 0.005$ ).[41] Reasons for delayed care-seeking can include access and cost. While cost  
35  
36 17 does influence healthcare use, parents of sick children usually do seek some treatment. In the  
37  
38 18 2014 Bangladesh Demographic and Health Survey, 52% of urban parents with children with  
39  
40 19 ARI symptoms in the 2 weeks prior to survey sought treatment from a health facility, 23%  
41  
42 20 went to pharmacies, and 12% went to traditional practitioners.[42] Only 12% of parents with  
43  
44 21 sick children sought no health care treatment at all.[42] While cost does not seem a large  
45  
46 22 barrier to seeking any treatment at all, cost likely influences choice of health provider.

47  
48  
49 23 Household relocation disrupts prior relationships with healthcare providers and  
50  
51 24 results in lack of familiarity with local services. A World Health Organization (WHO)  
52  
53 25 conceptual framework on social determinants of health can explore how mobility relates to  
54  
55 26 healthcare use.[43] In the WHO framework, structural determinants of social, economic, and  
56  
57 27 political contexts influence intermediary determinants of material, behavioral, psychosocial,  
58  
59  
60

1 and health system factors that ultimately determine an individual's health. Relocation can  
2 improve an individual's socioeconomic position in the long term, but mobility often disrupts  
3 material resources, psychosocial support, and health care access. Studies show that continuity  
4 of care is associated with increased vaccination, fewer emergency department visits, and  
5 decreased hospitalization among children.[12,44–46] People usually move to new areas  
6 because of pre-existing social connections through family, friends, or work.[7,47] These  
7 social contacts can act as pathways of important local knowledge, including health services,  
8 but recently relocated households have fewer social contacts and access fewer information  
9 sources. Other studies have also found that parental attitudes and knowledge are critical  
10 factors contributing to use of health services.[6,48–51] One literature review found that  
11 *practical* knowledge about vaccination schedule, timing, and logistics had a stronger  
12 association with vaccination uptake than scientific knowledge of vaccine names or biologic  
13 actions.[50] One study in India of 210 residents in slums and 100 migrant families of  
14 construction workers found 28% of slum residents and 64% of migrants identified lack of  
15 knowledge of place or time of services as a reason for decreased immunization.[51] Our study  
16 did not ask specifically about knowledge of vaccination services, but future research on  
17 knowledge of services could help elucidate how to connect new migrants to care.

18 Our finding that recently relocated children in Dhaka use fewer qualified health  
19 services compared to residentially stable children sheds light on health barriers faced by a  
20 growing population of children living in urban centers of low- and middle-income countries.  
21 Rigorous community surveillance in hospital catchment areas allows for increased  
22 understanding of factors affecting access to and use of healthcare services. Policymakers  
23 working to improve urban child health could invest in accurate counting of children living in  
24 communities with high household turnover in order to connect recently relocated households  
25 to already existing local health services. Further studies by researchers on patterns and  
26 mechanisms through which mobility affects healthcare use could inform critical intervention

1  
2  
3 1 points. Ultimately, cost-effective and targeted interventions to increase appropriate healthcare  
4  
5 2 use among recently relocated children could improve health of future urban populations.  
6  
7 3

#### 9 4 **Contributors**

11 5 SL was the Principal Investigator and involved in every aspect of the study from  
12 6 conceptualization to data analysis to manuscript writing and submission. NS, JA, and LH  
13 7 were involved in data analysis, and LH drafted the written work. All authors collaborated on  
14 8 and approved the final manuscript.  
15 9

#### 10 10 **Competing interests**

11 11 None declared.  
12 12

#### 13 13 **Provenance and peer review**

14 14 Not commissioned; externally peer reviewed.  
15 15

#### 16 16 **Ethical considerations**

17 17 The Ethical Review Committee of the International Centre for Diarrhoeal Disease  
18 18 Research, Bangladesh (icddr,b) reviewed and approved the study protocol.  
19 19

#### 20 20 **Participant consent**

21 21 Written informed consent was obtained from all participants before taking part in the  
22 22 initial Hib impact study.  
23 23

#### 24 24 **Funding**

25 25 The original Hib impact study data collection was funded by the Bill and Melinda  
26 26 Gates Foundation and the GAVI Hib Initiative (GR-00580). No additional funding was  
27 27 provided for this study.  
28 28  
29 29  
30 30  
31 31  
32 32  
33 33  
34 34  
35 35  
36 36  
37 37  
38 38  
39 39  
40 40  
41 41  
42 42  
43 43  
44 44  
45 45  
46 46  
47 47  
48 48  
49 49  
50 50  
51 51  
52 52  
53 53  
54 54  
55 55  
56 56  
57 57  
58 58  
59 59  
60 60



1  
2  
3 1  
45 2 **Data sharing**  
6  
78 3 Data are available by emailing the corresponding author LH at [lhong@stanford.edu](mailto:lhong@stanford.edu).  
9  
1011 4  
1213 5 **Acknowledgements**  
1415 6 The authors thank study participants, field researchers, and collaborative partners of  
16  
17 7 the Hib impact study who included Dhaka Shishu microbiology laboratories and the Johns  
18  
19 8 Hopkins Bloomberg School of Public Health. icddr,b is grateful to the Bangladesh, Canada,  
20  
21 9 Sweden and the United Kingdom governments for providing core/unrestricted support.  
22  
2324 10  
25  
26  
27  
28  
29  
30  
31  
32  
33  
34  
35  
36  
37  
38  
39  
40  
41  
42  
43  
44  
45  
46  
47  
48  
49  
50  
51  
52  
53  
54  
55  
56  
57  
58  
59  
60

## References

- 1 Troeger C, Blacker B, Khalil IA, *et al.* Estimates of the global, regional, and national morbidity, mortality, and aetiologies of lower respiratory infections in 195 countries, 1990–2016: a systematic analysis for the Global Burden of Disease Study 2016. *Lancet Infect Dis* 2018;**18**:1191–210. doi:10.1016/S1473-3099(18)30310-4
- 2 UN-Habitat. *World Cities Report 2016: Urbanization and Development – Emerging Futures*. New York: UN-Habitat 2016. <https://unhabitat.org/books/world-cities-report/> (accessed 12 Jan 2019).
- 3 United Nations, Department of Economic and Social Affairs, Population Division. *World Urbanization Prospects: The 2014 Revision [Highlights]*. New York: United Nations 2015. <http://esa.un.org/unpd/wup/Publications/Files/WUP2014-Highlights.pdf> (accessed 3 Feb 2016).
- 4 UN-Habitat. *The challenge of slums: global report on human settlements 2003*. New York: UN-Habitat 2003.
- 5 Ezeh A, Oyebo O, Satterthwaite D, *et al.* The history, geography, and sociology of slums and the health problems of people who live in slums. *The Lancet* 2017;**389**:547–58. doi:10.1016/S0140-6736(16)31650-6
- 6 Crocker-Buque T, Mindra G, Duncan R, *et al.* Immunization, urbanization and slums – a systematic review of factors and interventions. *BMC Public Health* 2017;**17**:556. doi:10.1186/s12889-017-4473-7
- 7 Rashid SF. Strategies to reduce exclusion among populations living in urban slum settlements in Bangladesh. *J Health Popul Nutr* 2009;**27**:574–86.
- 8 UN-Habitat. *State of the World's Cities 2006/7*. New York: UN-Habitat 2006.
- 9 Unger A. Children's health in slum settings. *Arch Dis Child* 2013;**98**:799–805. doi:10.1136/archdischild-2011-301621
- 10 Antai D. Migration and child immunization in Nigeria: individual-and community-level contexts. *BMC Public Health* 2010;**10**:116.
- 11 Jelleyman T, Spencer N. Residential mobility in childhood and health outcomes: a systematic review. *J Epidemiol Community Health* 2008;**62**:584–92.
- 12 Fowler MG, Simpson GA, Schoendorf KC. Families on the move and children's health care. *Pediatrics* 1993;**91**:934–40.
- 13 Wood D, Halfon N, Scarlata D, *et al.* Impact of family relocation on children's growth, development, school function, and behavior. *JAMA* 1993;**270**:1334–8.
- 14 Awoh AB, Plugge E. Immunisation coverage in rural–urban migrant children in low and middle-income countries (LMICs): a systematic review and meta-analysis. *J Epidemiol Community Health* 2016;**70**:305–11.
- 15 Kusuma YS, Kumari R, Pandav CS, *et al.* Migration and immunization: determinants of childhood immunization uptake among socioeconomically disadvantaged migrants in Delhi, India. *Trop Med Int Health* 2010;**15**:1326–32.

- 1  
2  
3 1 16 NIPORT, icddr,b, MEASURE Evaluation. Bangladesh Urban Health Survey 2013 Final  
4 2 Report. 2015. <http://www.cpc.unc.edu/measure/resources/publications/tr-15-117>  
5 3 (accessed 3 Feb 2016).  
6  
7 4 17 Government of Bangladesh. Bangladesh EPI coverage evaluation survey 2011, Expanded  
8 5 Programme on Immunization. 2011.  
9 6 [http://www.dghs.gov.bd/images/docs/EPI/CES%20Reports/EPI%20Coverage%20Evalua](http://www.dghs.gov.bd/images/docs/EPI/CES%20Reports/EPI%20Coverage%20Evaluation%20Survey%202011.pdf)  
10 7 [tion%20Survey%202011.pdf](http://www.dghs.gov.bd/images/docs/EPI/CES%20Reports/EPI%20Coverage%20Evaluation%20Survey%202011.pdf)  
11  
12 8 18 Hayford K, Uddin MJ, Koehlmoos TP, *et al.* Cost and sustainability of a successful  
13 9 package of interventions to improve vaccination coverage for children in urban slums of  
14 10 Bangladesh. *Vaccine* 2014;**32**:2294–9. doi:10.1016/j.vaccine.2014.02.075  
15  
16 11 19 Uddin MJ, Larson CP, Oliveras E, *et al.* Child immunization coverage in urban slums of  
17 12 Bangladesh: impact of an intervention package. *Health Policy Plan* 2010;**25**.  
18 13 doi:10.1093/heapol/czp041  
19  
20 14 20 Perry H, Weierbach R, Hossain I, *et al.* Childhood immunization coverage in zone 3 of  
21 15 Dhaka City: the challenge of reaching impoverished households in urban Bangladesh.  
22 16 *Bull World Health Organ* 1998;**76**:565–73.  
23  
24 17 21 Luby SP, Halder AK, Saha SK, *et al.* A low-cost approach to measure the burden of  
25 18 vaccine preventable diseases in urban areas. *Vaccine* 2010;**28**:4903–12.  
26 19 doi:10.1016/j.vaccine.2010.05.040  
27  
28 20 22 Uddin MJ, Shamsuzzaman M, Horng L, *et al.* Use of mobile phones for improving  
29 21 vaccination coverage among children living in rural hard-to-reach areas and urban streets  
30 22 of Bangladesh. *Vaccine* 2016;**34**:276–83. doi:10.1016/j.vaccine.2015.11.024  
31  
32 23 23 Sultana NK, Saha SK, Al-Emran HM, *et al.* Impact of introduction of the Haemophilus  
33 24 influenzae type b conjugate vaccine into childhood immunization on meningitis in  
34 25 Bangladeshi infants. *J Pediatr* 2013;**163**:S73–8.  
35  
36 26 24 Vyas S, Kumaranayake L. Constructing socio-economic status indices: how to use  
37 27 principal components analysis. *Health Policy Plan* 2006;**21**:459–68.  
38 28 doi:10.1093/heapol/czl029  
39  
40 29 25 Luby SP, Halder AK. Associations among handwashing indicators, wealth, and  
41 30 symptoms of childhood respiratory illness in urban Bangladesh. *Trop Med Int Health*  
42 31 2008;**13**:835–44. doi:10.1111/j.1365-3156.2008.02074.x  
43  
44 32 26 Sharker MY, Nasser M, Abedin J, *et al.* The risk of misclassifying subjects within  
45 33 principal component based asset index. *Emerg Themes Epidemiol* 2014;**11**:6.  
46  
47 34 27 Zou G. A modified poisson regression approach to prospective studies with binary data.  
48 35 *Am J Epidemiol* 2004;**159**:702–6.  
49  
50 36 28 Chen W, Shi J, Qian L, *et al.* Comparison of robustness to outliers between robust  
51 37 poisson models and log-binomial models when estimating relative risks for common  
52 38 binary outcomes: a simulation study. *BMC Med Res Methodol* 2014;**14**:82.  
53 39 doi:10.1186/1471-2288-14-82  
54  
55  
56  
57  
58  
59  
60

- 1  
2  
3 1 29 Quaiyum MA, Gazi R, Khan AI, *et al.* Programmatic aspects of dropouts in child  
4 2 vaccination in Bangladesh: findings from a prospective study. *Asia Pac J Public Health*  
5 3 2011;**23**:141–50. doi:10.1177/1010539509342119  
6  
7 4 30 Hussain A, Ali SM, Kvåle G. Determinants of mortality among children in the urban  
8 5 slums of Dhaka city, Bangladesh. *Trop Med Int Health* 1999;**4**:758–64.  
9  
10 6 31 Hidalgo B, Goodman M. Multivariate or Multivariable Regression? *Am J Public Health*  
11 7 2012;**103**:39–40. doi:10.2105/AJPH.2012.300897  
12  
13 8 32 Restrepo-Méndez MC, Barros AJ, Wong KL, *et al.* Inequalities in full immunization  
14 9 coverage: trends in low- and middle-income countries. *Bull World Health Organ*  
15 10 2016;**94**:794–805B. doi:http://dx.doi.org/10.2471/BLT.15.162172  
16  
17 11 33 Fox J, Weisberg S. *An R Companion to Applied Regression. Chapter 6: Diagnosing*  
18 12 *Problems in Linear and Generalized Linear Models.* SAGE Publications 2011.  
19 13 [https://us.sagepub.com/sites/default/files/upm-binaries/38503\\_Chapter6.pdf](https://us.sagepub.com/sites/default/files/upm-binaries/38503_Chapter6.pdf)  
20  
21 14 34 Heller LR. Do slums matter? Location and early childhood preventive care choices  
22 15 among urban residents of Bangladesh. *Soc Sci Med* 2013;**94**.  
23 16 doi:10.1016/j.socscimed.2013.06.011  
24  
25 17 35 Miles M, Ryman TK, Dietz V, *et al.* Validity of vaccination cards and parental recall to  
26 18 estimate vaccination coverage: a systematic review of the literature. *Vaccine*  
27 19 2013;**31**:1560–8. doi:10.1016/j.vaccine.2012.10.089  
28  
29 20 36 Murray CJ, Shengelia B, Gupta N, *et al.* Validity of reported vaccination coverage in 45  
30 21 countries. *Lancet* 2003;**362**:1022–7.  
31  
32 22 37 Luman ET, Ryman TK, Sablan M. Estimating vaccination coverage: validity of  
33 23 household-retained vaccination cards and parental recall. *Vaccine* 2009;**27**:2534–9.  
34 24 doi:10.1016/j.vaccine.2008.10.002  
35  
36 25 38 Brown J, Monasch R, Bicego G, *et al.* *An assessment of the quality of national child*  
37 26 *immunization coverage estimates in population-based surveys.* MEASURE Evaluation,  
38 27 Carolina Population Center, University of North Carolina at Chapel Hill 2002.  
39  
40 28 39 Khan A, Khan A. Validating measures of immunization coverage: lessons from  
41 29 international experience. USAID 2012.  
42 30 [http://www.resdev.org/files/policy\\_brief/10/Policy%20brief%2010%20-](http://www.resdev.org/files/policy_brief/10/Policy%20brief%2010%20-%20Validation%20of%20Immunization%20Literature.pdf)  
43 31 [%20Validation%20of%20Immunization%20Literature.pdf](http://www.resdev.org/files/policy_brief/10/Policy%20brief%2010%20-%20Validation%20of%20Immunization%20Literature.pdf) (accessed 2 Oct 2015).  
44  
45 32 40 Fujita M, Sato Y, Nagashima K, *et al.* Impact of geographic accessibility on utilization of  
46 33 the annual health check-ups by income level in Japan: A multilevel analysis. *PLoS One*  
47 34 2017;**12**:e0177091. doi:10.1371/journal.pone.0177091  
48  
49 35 41 Bokade CM, Madhura AD, Bagul AS, *et al.* Predictors of mortality in children due to  
50 36 severe and very severe pneumonia. *Niger Med J* 2015;**56**:287.  
51  
52 37 42 National Institute of Population Research and Training - NIPORT/Bangladesh, Mitra and  
53 38 Associates, ICF International. *Bangladesh Demographic and Health Survey 2014.* Dhaka,  
54 39 Bangladesh: NIPORT, Mitra and Associates, and ICF International 2016.  
55 40 <http://dhsprogram.com/pubs/pdf/FR311/FR311.pdf>  
56  
57  
58  
59  
60

- 1  
2  
3 1 43 World Health Organization. *A conceptual framework for action on the social*  
4 2 *determinants of health*. Geneva: WHO 2010.  
5 3 [http://apps.who.int/iris/bitstream/10665/44489/1/9789241500852\\_eng.pdf](http://apps.who.int/iris/bitstream/10665/44489/1/9789241500852_eng.pdf) (accessed 27  
6 4 Feb 2017).
- 8 5 44 Christakis DA, Mell L, Wright JA, *et al*. The association between greater continuity of  
9 6 care and timely measles-mumps-rubella vaccination. *Am J Public Health* 2000;**90**:962.
- 11 7 45 Christakis DA, Mell L, Koepsell TD, *et al*. Association of lower continuity of care with  
12 8 greater risk of emergency department use and hospitalization in children. *Pediatrics*  
13 9 2001;**107**:524–9.
- 15 10 46 Van Walraven C, Oake N, Jennings A, *et al*. The association between continuity of care  
16 11 and outcomes: a systematic and critical review. *J Eval Clin Pract* 2010;**16**:947–56.
- 18 12 47 Kuhn R. Identities in motion: Social exchange networks and rural- urban migration in  
19 13 Bangladesh. *Contributions to Indian Sociology* 2003;**37**:311–37.  
20 14 doi:10.1177/006996670303700113
- 22 15 48 Mills E, Jadad AR, Ross C, *et al*. Systematic review of qualitative studies exploring  
23 16 parental beliefs and attitudes toward childhood vaccination identifies common barriers to  
24 17 vaccination. *J Clin Epidemiol* 11;**58**:1081–8. doi:10.1016/j.jclinepi.2005.09.002
- 26 18 49 Rainey JJ, Watkins M, Ryman TK, *et al*. Reasons related to non-vaccination and under-  
27 19 vaccination of children in low and middle income countries: findings from a systematic  
28 20 review of the published literature, 1999–2009. *Vaccine* 2011;**29**:8215–21.
- 30 21 50 Favin M, Steinglass R, Fields R, *et al*. Why children are not vaccinated: a review of the  
31 22 grey literature. *International Health* 2012;**4**:229–38. doi:10.1016/j.inhe.2012.07.004
- 33 23 51 Sharma V, Singh A, Sharma V. Provider’s and User’s Perspective about Immunization  
34 24 Coverage among Migratory and Non-migratory Population in Slums and Construction  
35 25 Sites of Chandigarh. *J Urban Health* 2015;**92**:304–12. doi:10.1007/s11524-015-9939-2

26

1  
2  
3  
4  
5  
6  
7  
8  
9  
10  
11  
12  
13  
14  
15  
16  
17  
18  
19  
20  
21  
22  
23  
24  
25  
26  
27  
28  
29  
30  
31  
32  
33  
34  
35  
36  
37  
38  
39  
40  
41  
42  
43  
44  
45  
46  
47

Figures and Tables

**Table 1: Mobility status of study households with children age 0-59 months and association with demographic, socioeconomic, and health characteristics using t- and  $\chi^2$ -tests**

|                                       | Residentially stable,<br>$\geq 24$ months<br>n=5513 |           | Recently relocated,<br>$\leq 12$ months<br>n=4507 |           | p-value |
|---------------------------------------|-----------------------------------------------------|-----------|---------------------------------------------------|-----------|---------|
| <u>Demographics</u>                   | <u>mean</u>                                         | <u>SE</u> | <u>mean</u>                                       | <u>SE</u> |         |
| Number of household members           | 5.40                                                | 0.09      | 4.60                                              | 0.10      | <0.001  |
| Number of children <5yrs in household | 1.28                                                | 0.01      | 1.25                                              | 0.01      | 0.194   |
| Age of index child in months          | 30.0                                                | 0.23      | 28.7                                              | 0.25      | <0.001  |
|                                       | <u>n</u>                                            | <u>%</u>  | <u>n</u>                                          | <u>%</u>  |         |
| Sex of index child: Male              | 2478                                                | 45        | 2048                                              | 45        | 0.622   |
| <u>Socioeconomics</u>                 |                                                     |           |                                                   |           |         |
| Mother's education                    |                                                     |           |                                                   |           | <0.001  |
| No education                          | 1133                                                | 21        | 1162                                              | 26        |         |
| Some schooling                        | 1142                                                | 21        | 1176                                              | 26        |         |
| Finished secondary                    | 1849                                                | 34        | 1483                                              | 33        |         |
| > Secondary                           | 1389                                                | 25        | 686                                               | 15        |         |
| Father's education                    |                                                     |           |                                                   |           | <0.001  |
| No education                          | 1261                                                | 23        | 1139                                              | 25        |         |
| Some schooling                        | 913                                                 | 17        | 911                                               | 20        |         |
| Finished secondary                    | 1525                                                | 28        | 1372                                              | 30        |         |
| > Secondary                           | 1814                                                | 33        | 1085                                              | 24        |         |
| Occupation of household head          |                                                     |           |                                                   |           | <0.001  |
| Unemployed or other                   | 482                                                 | 9         | 232                                               | 5         |         |
| Daily labor                           | 916                                                 | 17        | 1218                                              | 27        |         |
| Shopkeeper or merchant                | 1787                                                | 32        | 1058                                              | 23        |         |
| Salaried service                      | 2328                                                | 42        | 1999                                              | 44        |         |
| Monthly household income <sup>a</sup> |                                                     |           |                                                   |           | <0.001  |
| $\leq 5,000$ taka (US \$73)           | 971                                                 | 18        | 1080                                              | 24        |         |

|                                                                                        |      |    |      |    |                  |
|----------------------------------------------------------------------------------------|------|----|------|----|------------------|
| 5,001 – 10,000 taka                                                                    | 1634 | 30 | 1925 | 43 |                  |
| > 10,000 taka (US \$145)                                                               | 2900 | 53 | 1498 | 33 |                  |
| Household wealth index <sup>b</sup>                                                    |      |    |      |    | <b>&lt;0.001</b> |
| Poorest                                                                                | 1092 | 20 | 1110 | 25 |                  |
| Lower middle                                                                           | 922  | 17 | 1021 | 23 |                  |
| Middle                                                                                 | 966f | 18 | 911  | 20 |                  |
| Upper middle                                                                           | 1455 | 26 | 1155 | 26 |                  |
| Richest                                                                                | 1078 | 20 | 310  | 7  |                  |
| <u>Health services knowledge</u>                                                       |      |    |      |    |                  |
| Knowledge of local hospital                                                            | 4709 | 85 | 3428 | 76 | <b>&lt;0.001</b> |
| <u>Health outcomes</u>                                                                 |      |    |      |    |                  |
| Severe acute respiratory illness suffered by index child within 12 months <sup>c</sup> | 763  | 14 | 695  | 15 | <b>0.026</b>     |
| Meningitis/encephalitis suffered by index child within 12 months <sup>d</sup>          | 185  | 3  | 164  | 4  | 0.443            |

<sup>a</sup>12 respondents (8 residentially stable and 4 recently relocated) did not know or did not disclose household income.

<sup>b</sup>Polychoric Principal Components Analysis was used to create a household wealth index including structural housing characteristics, cooking fuel, drinking water, and sanitation.

<sup>c</sup>One residentially stable respondent did not know if child recently had a severe acute respiratory illness.

<sup>d</sup>Three respondents did not know if child recently had a serious illness with mental status changes (2 residentially stable and 1 recently relocated).

1  
2  
3  
4  
5  
6  
7  
8  
9  
10  
11  
12  
13  
14  
15  
16  
17  
18  
19  
20  
21  
22  
23  
24  
25  
26  
27  
28  
29  
30  
31  
32  
33  
34  
35  
36  
37  
38  
39  
40  
41  
42  
43  
44  
45  
46  
47

**Table 2: Using vaccination card plus maternal recall, vaccination coverage among children age 9-59 months and association with mobility status using univariate and multivariable models with modified Poisson regression**

|                                                  | Partial vaccination<br>n=1465 (17%) |           | Full vaccination <sup>a</sup><br>n=7043 (83%) |           | PR <sup>b</sup> | 95% CI             | p-value          |
|--------------------------------------------------|-------------------------------------|-----------|-----------------------------------------------|-----------|-----------------|--------------------|------------------|
| <u>Univariate analyses</u>                       |                                     |           |                                               |           |                 |                    |                  |
| Mobility status                                  | <u>n</u>                            | <u>%</u>  | <u>n</u>                                      | <u>%</u>  |                 |                    |                  |
| Residentially stable ≥24 months                  | 706                                 | 15        | 4007                                          | 85        | Reference       |                    |                  |
| Recently relocated ≤12 months                    | 759                                 | 20        | 3036                                          | 80        | <b>0.94</b>     | <b>0.91-0.97</b>   | <b>&lt;0.001</b> |
| Demographics                                     | <u>mean</u>                         | <u>SE</u> | <u>mean</u>                                   | <u>SE</u> |                 |                    |                  |
| Number of children <5yrs in household            | 1.31                                | 0.02      | 1.25                                          | 0.01      | <b>0.96</b>     | <b>0.93-0.98</b>   | <b>0.002</b>     |
| Age of index child in months                     | 32.0                                | 0.44      | 34.2                                          | 0.16      | <b>1.002</b>    | <b>1.001-1.003</b> | <b>&lt;0.001</b> |
| Socioeconomics                                   |                                     |           |                                               |           |                 |                    |                  |
| Mother's education                               | <u>n</u>                            | <u>%</u>  | <u>n</u>                                      | <u>%</u>  |                 |                    |                  |
| No education                                     | 629                                 | 31        | 1377                                          | 69        | Reference       |                    |                  |
| Some schooling                                   | 401                                 | 21        | 1540                                          | 79        | <b>1.16</b>     | <b>1.10-1.21</b>   | <b>&lt;0.001</b> |
| Finished secondary                               | 323                                 | 11        | 2513                                          | 89        | <b>1.29</b>     | <b>1.23-1.36</b>   | <b>&lt;0.001</b> |
| > Higher secondary                               | 112                                 | 6         | 1613                                          | 94        | <b>1.36</b>     | <b>1.30-1.43</b>   | <b>&lt;0.001</b> |
| Occupation of household head                     |                                     |           |                                               |           |                 |                    |                  |
| Unemployed or other                              | 106                                 | 17        | 505                                           | 83        | Reference       |                    |                  |
| Daily labor                                      | 524                                 | 29        | 1283                                          | 71        | <b>0.86</b>     | <b>0.82-0.90</b>   | <b>&lt;0.001</b> |
| Shopkeeper or merchant                           | 348                                 | 14        | 2084                                          | 86        | 1.04            | 0.99-1.08          | 0.112            |
| Salaried service                                 | 487                                 | 13        | 3171                                          | 87        | <b>1.05</b>     | <b>1.01-1.09</b>   | <b>0.029</b>     |
| Household wealth status (PCA <sup>c</sup> )      |                                     |           |                                               |           |                 |                    |                  |
| Poorest                                          | 596                                 | 32        | 1290                                          | 68        | Reference       |                    |                  |
| Lower middle                                     | 334                                 | 20        | 1298                                          | 80        | <b>1.16</b>     | <b>1.09-1.24</b>   | <b>&lt;0.001</b> |
| Middle                                           | 242                                 | 15        | 1348                                          | 85        | <b>1.24</b>     | <b>1.16-1.32</b>   | <b>&lt;0.001</b> |
| Upper middle                                     | 193                                 | 9         | 2043                                          | 91        | <b>1.34</b>     | <b>1.25-1.42</b>   | <b>&lt;0.001</b> |
| Richest                                          | 100                                 | 9         | 1064                                          | 91        | <b>1.34</b>     | <b>1.25-1.43</b>   | <b>&lt;0.001</b> |
| Health services knowledge                        |                                     |           |                                               |           |                 |                    |                  |
| Does <i>not</i> have knowledge of local hospital | 354                                 | 23        | 1218                                          | 77        | Reference       |                    |                  |
| Has knowledge of local hospital                  | 1111                                | 16        | 5825                                          | 84        | <b>1.08</b>     | <b>1.05-1.12</b>   | <b>&lt;0.001</b> |



| <u>Multivariable analyses with different models</u>                         |             |                  |                  |
|-----------------------------------------------------------------------------|-------------|------------------|------------------|
| Mobility, adjusting for demographics (# of children and age of index child) | <b>0.94</b> | <b>0.92-0.97</b> | <b>&lt;0.001</b> |
| Mobility, adjusting for socioeconomics (education, occupation, and wealth)  | <b>0.97</b> | <b>0.95-0.99</b> | <b>0.009</b>     |
| Mobility, adjusting for demographics and socioeconomics                     | <b>0.97</b> | <b>0.95-0.99</b> | <b>0.016</b>     |

<sup>a</sup>Full vaccination coverage per Expanded Programme on Immunization includes 1 dose of BCG, 3 doses of polio, 3 doses of DPT, and 1 dose of measles vaccines.

<sup>b</sup>PR, Prevalence Ratio.

<sup>c</sup>Polychoric Principal Components Analysis was used to create a household wealth index including structural housing characteristics, cooking fuel, drinking water, and sanitation.

For peer review only

1  
2  
3  
4  
5  
6  
7  
8  
9  
10  
11  
12  
13  
14  
15  
16  
17  
18  
19  
20  
21  
22  
23  
24  
25  
26  
27  
28  
29  
30  
31  
32  
33  
34  
35  
36  
37  
38  
39  
40  
41  
42  
43  
44  
45  
46  
47

**Table 3: Using vaccination card only, vaccination coverage among children age 9-59 months who have vaccination cards and association with mobility status using univariate and multivariable models with modified Poisson regression**

|                                                  | Partial vaccination<br>n=564 (15%) |           | Full vaccination <sup>a</sup><br>n=3085 (85%) |           | PR <sup>b</sup> | 95% CI             | p-value          |
|--------------------------------------------------|------------------------------------|-----------|-----------------------------------------------|-----------|-----------------|--------------------|------------------|
| <u>Univariate analyses</u>                       |                                    |           |                                               |           |                 |                    |                  |
| Mobility status                                  | <u>n</u>                           | <u>%</u>  | <u>n</u>                                      | <u>%</u>  |                 |                    |                  |
| Residentially stable ≥24 months                  | 329                                | 14        | 1948                                          | 86        | Reference       |                    |                  |
| Recently relocated ≤12 months                    | 235                                | 17        | 1137                                          | 83        | 0.97            | 0.93-1.00          | 0.083            |
| Demographics                                     | <u>mean</u>                        | <u>SE</u> | <u>mean</u>                                   | <u>SE</u> |                 |                    |                  |
| Number of children <5yrs in household            | 1.26                               | 0.02      | 1.24                                          | 0.01      | 0.99            | 0.96-1.02          | 0.486            |
| Age of index child in months                     | 27.1                               | 0.64      | 29.6                                          | 0.25      | <b>1.002</b>    | <b>1.001-1.003</b> | <b>0.001</b>     |
| Socioeconomics                                   |                                    |           |                                               |           |                 |                    |                  |
| Mother's education                               | <u>n</u>                           | <u>%</u>  | <u>n</u>                                      | <u>%</u>  |                 |                    |                  |
| No education                                     | 165                                | 28        | 430                                           | 72        | Reference       |                    |                  |
| Some schooling                                   | 123                                | 16        | 654                                           | 84        | <b>1.16</b>     | <b>1.09-1.24</b>   | <b>&lt;0.001</b> |
| Finished secondary                               | 186                                | 14        | 1158                                          | 86        | <b>1.19</b>     | <b>1.11-1.28</b>   | <b>&lt;0.001</b> |
| > Higher secondary                               | 90                                 | 10        | 843                                           | 90        | <b>1.25</b>     | <b>1.17-1.33</b>   | <b>&lt;0.001</b> |
| Occupation of household head                     |                                    |           |                                               |           |                 |                    |                  |
| Unemployed or other                              | 35                                 | 13        | 238                                           | 87        | Reference       |                    |                  |
| Daily labor                                      | 148                                | 26        | 413                                           | 74        | <b>0.84</b>     | <b>0.78-0.91</b>   | <b>&lt;0.001</b> |
| Shopkeeper or merchant                           | 143                                | 13        | 921                                           | 87        | 0.99            | 0.94-1.04          | 0.778            |
| Salaried service                                 | 238                                | 14        | 1513                                          | 86        | 0.99            | 0.95-1.04          | 0.704            |
| Household wealth status (PCA <sup>c</sup> )      |                                    |           |                                               |           |                 |                    |                  |
| Poorest                                          | 148                                | 27        | 401                                           | 73        | Reference       |                    |                  |
| Lower middle                                     | 131                                | 21        | 503                                           | 79        | <b>1.09</b>     | <b>1.02-1.16</b>   | <b>0.009</b>     |
| Middle                                           | 97                                 | 15        | 572                                           | 86        | <b>1.17</b>     | <b>1.09-1.26</b>   | <b>&lt;0.001</b> |
| Upper middle                                     | 110                                | 10        | 1005                                          | 90        | <b>1.23</b>     | <b>1.15-1.32</b>   | <b>&lt;0.001</b> |
| Richest                                          | 78                                 | 11        | 604                                           | 89        | <b>1.21</b>     | <b>1.13-1.30</b>   | <b>&lt;0.001</b> |
| Health services knowledge                        |                                    |           |                                               |           |                 |                    |                  |
| Does <i>not</i> have knowledge of local hospital | 101                                | 19        | 434                                           | 81        | Reference       |                    |                  |
| Has knowledge of local hospital                  | 463                                | 15        | 2651                                          | 85        | <b>1.05</b>     | <b>1.01-1.09</b>   | <b>0.025</b>     |

1  
2  
3 Multivariable analyses with different models

|                                                                               |      |           |       |
|-------------------------------------------------------------------------------|------|-----------|-------|
| 4 Mobility, adjusting for demographics (# of children and age of index child) | 0.97 | 0.94-1.01 | 0.126 |
| 5 Mobility, adjusting for socioeconomics (education, occupation, and wealth)  | 0.98 | 0.95-1.02 | 0.308 |
| 6 Mobility, adjusting for demographics and socioeconomics                     | 0.98 | 0.95-1.02 | 0.396 |

7  
8 <sup>a</sup>Full vaccination coverage per Expanded Programme on Immunization includes 1 dose of BCG, 3 doses of polio, 3 doses of DPT, and 1 dose of measles vaccines.

9 <sup>b</sup>PR, Prevalence Ratio.

10 <sup>c</sup>Polychoric Principal Components Analysis was used to create a household wealth index including structural housing characteristics, cooking fuel, drinking water, and sanitation.

11  
12  
13  
14  
15  
16  
17  
18  
19  
20  
21  
22  
23  
24  
25  
26  
27  
28  
29  
30  
31  
32  
33  
34  
35  
36  
37  
38  
39  
40  
41  
42  
43  
44  
45  
46  
47

For peer review only

**Table 4: Qualified provider visits for severe acute respiratory illness within prior year among children < 5 years old and association with mobility using univariate and multivariable models with modified Poisson regression**

|                                                  | No qualified provider for severe ARI <sup>a</sup><br>n=358 (25%) |           | Qualified provider for severe ARI <sup>a</sup><br>n=1100 (75%) |           | PR <sup>b</sup> | 95% CI             | p-value          |
|--------------------------------------------------|------------------------------------------------------------------|-----------|----------------------------------------------------------------|-----------|-----------------|--------------------|------------------|
| <u>Univariate analyses</u>                       |                                                                  |           |                                                                |           |                 |                    |                  |
| Mobility status                                  | <u>n</u>                                                         | <u>%</u>  | <u>n</u>                                                       | <u>%</u>  |                 |                    |                  |
| Residentially stable $\geq 24$ months            | 141                                                              | 18        | 622                                                            | 82        | Reference       |                    |                  |
| Recently relocated $\leq 12$ months              | 217                                                              | 31        | 478                                                            | 69        | <b>0.84</b>     | <b>0.79-0.90</b>   | <b>&lt;0.001</b> |
| Demographics                                     | <u>mean</u>                                                      | <u>SE</u> | <u>mean</u>                                                    | <u>SE</u> |                 |                    |                  |
| Number of children <5yrs in household            | 1.23                                                             | 0.03      | 1.25                                                           | 0.02      | 1.02            | 0.97-1.08          | 0.437            |
| Age of index child in months                     | 29.1                                                             | 0.83      | 23.7                                                           | 0.44      | <b>0.994</b>    | <b>0.992-0.996</b> | <b>&lt;0.001</b> |
| Socioeconomics                                   |                                                                  |           |                                                                |           |                 |                    |                  |
| Mother's education                               | <u>n</u>                                                         | <u>%</u>  | <u>n</u>                                                       | <u>%</u>  |                 |                    |                  |
| No education                                     | 134                                                              | 38        | 220                                                            | 62        | Reference       |                    |                  |
| Some schooling                                   | 127                                                              | 32        | 267                                                            | 68        | 1.09            | 0.96-1.23          | 0.170            |
| Finished secondary                               | 79                                                               | 16        | 425                                                            | 84        | <b>1.36</b>     | <b>1.20-1.54</b>   | <b>&lt;0.001</b> |
| > Higher secondary                               | 18                                                               | 9         | 188                                                            | 91        | <b>1.47</b>     | <b>1.30-1.66</b>   | <b>&lt;0.001</b> |
| Occupation of household head                     |                                                                  |           |                                                                |           |                 |                    |                  |
| Unemployed or other                              | 24                                                               | 23        | 82                                                             | 77        | Reference       |                    |                  |
| Daily labor                                      | 139                                                              | 36        | 244                                                            | 64        | <b>0.82</b>     | <b>0.72-0.94</b>   | <b>0.005</b>     |
| Shopkeeper or merchant                           | 89                                                               | 22        | 320                                                            | 78        | 1.01            | 0.90-1.14          | 0.848            |
| Salaried service                                 | 106                                                              | 19        | 454                                                            | 81        | 1.05            | 0.93-1.18          | 0.435            |
| Household wealth status (PCA <sup>c</sup> )      |                                                                  |           |                                                                |           |                 |                    |                  |
| Poorest                                          | 154                                                              | 40        | 228                                                            | 60        | Reference       |                    |                  |
| Lower middle                                     | 93                                                               | 30        | 220                                                            | 70        | <b>1.18</b>     | <b>1.02-1.37</b>   | <b>0.031</b>     |
| Middle                                           | 59                                                               | 21        | 220                                                            | 79        | <b>1.32</b>     | <b>1.16-1.51</b>   | <b>&lt;0.001</b> |
| Upper middle                                     | 37                                                               | 12        | 277                                                            | 88        | <b>1.48</b>     | <b>1.31-1.67</b>   | <b>&lt;0.001</b> |
| Richest                                          | 15                                                               | 9         | 155                                                            | 91        | <b>1.53</b>     | <b>1.35-1.73</b>   | <b>&lt;0.001</b> |
| Health services knowledge                        |                                                                  |           |                                                                |           |                 |                    |                  |
| Does <i>not</i> have knowledge of local hospital | 114                                                              | 49        | 118                                                            | 51        | Reference       |                    |                  |

|                                                                             |     |    |     |    |             |                  |                  |
|-----------------------------------------------------------------------------|-----|----|-----|----|-------------|------------------|------------------|
| Has knowledge of local hospital                                             | 244 | 20 | 982 | 80 | <b>1.57</b> | <b>1.34-1.85</b> | <b>&lt;0.001</b> |
| <u>Multivariable analyses with different models</u>                         |     |    |     |    |             |                  |                  |
| Mobility, adjusting for demographics (# of children and age of index child) |     |    |     |    | <b>0.84</b> | <b>0.79-0.89</b> | <b>&lt;0.001</b> |
| Mobility, adjusting for socioeconomic (education, occupation, and wealth)   |     |    |     |    | <b>0.89</b> | <b>0.84-0.94</b> | <b>&lt;0.001</b> |
| Mobility, adjusting for demographics and socioeconomic                      |     |    |     |    | <b>0.88</b> | <b>0.84-0.93</b> | <b>&lt;0.001</b> |

<sup>a</sup>ARI, Acute Respiratory Illness.

<sup>b</sup>PR, Prevalence Ratio.

<sup>c</sup>Polychoric Principal Components Analysis was used to create a household wealth index including structural housing characteristics, cooking fuel, drinking water, and sanitation.

For peer review only

1  
2  
3  
4  
5  
6  
7  
8  
9  
10  
11  
12  
13  
14  
15  
16  
17  
18  
19  
20  
21  
22  
23  
24  
25  
26  
27  
28  
29  
30  
31  
32  
33  
34  
35  
36  
37  
38  
39  
40  
41  
42  
43  
44  
45  
46  
47

**Figure 1: Children sampled by mobility status for healthcare utilization and vaccination coverage analysis**

Note: \*ARI = Acute Respiratory Illness

For peer review only

**Supplemental Figure 1: Cook's distance calculations to examine influential observations**

Cook's distance plots of multivariable models examining mobility, demographics, and socioeconomics for: vaccination using card plus maternal recall among children 9-59 months (A), vaccination using card only among children 9-59 months (B), qualified provider visits for respiratory infections among children <5 years old (C), vaccination using card plus maternal recall among children 9-23 months (D), and vaccination using card only among children 9-23 months (E). The red lines indicate threshold value of  $4/n$  where  $n$ =number of observations.

For peer review only

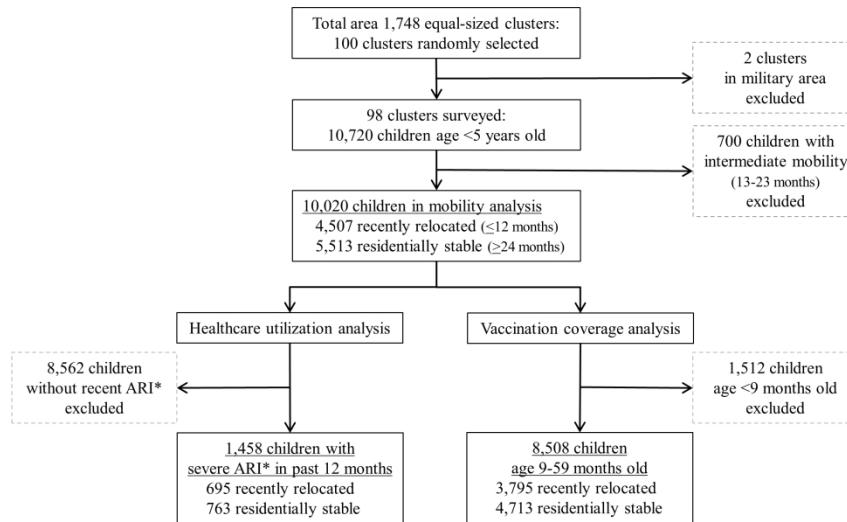

**Figure 1: Children sampled by mobility status for healthcare utilization and vaccination coverage analysis**  
 Note: \*ARI = Acute Respiratory Illness

Figure 1: Children sampled by mobility status for healthcare utilization and vaccination coverage analysis  
 Note: \*ARI = Acute Respiratory Illness

254x190mm (300 x 300 DPI)



**Effect of household relocation on child vaccination and health service utilization in Dhaka, Bangladesh:  
a cross-sectional community survey**

**SUPPLEMENTAL FIGURES AND TABLES**

**Supplemental Table 1: Household wealth principal components analysis coding and variable loading**

| <b>Indicator</b>    | <b>Coding</b>                                                                                                                                   | <b>Loading</b> |
|---------------------|-------------------------------------------------------------------------------------------------------------------------------------------------|----------------|
| Number of rooms     | Continuous                                                                                                                                      | 0.337          |
| Housing arrangement | 1 = Free<br>2 = Rental<br>3 = Owned                                                                                                             | 0.235          |
| Roof                | 1 = Natural roof (bamboo/thatch)<br>2 = Rudimentary roof (tin)<br>3 = Finished roof (cement/concrete/tiled)<br>4 = Other                        | 0.392          |
| Walls               | 1 = Natural walls (jute/bamboo/mud)<br>2 = Rudimentary walls (wood)<br>3 = Finished walls (tin/brick/cement)<br>4 = Other                       | 0.316          |
| Floor               | 1 = Natural floor (earth/bamboo)<br>2 = Rudimentary floor (wood)<br>3 = Finished floor (cement/concrete)<br>4 = Other                           | 0.377          |
| Cooking fuel        | 1 = Natural (wood/grass/dung)<br>2 = Coal/charcoal<br>3 = Kerosene<br>4 = Electricity<br>5 = Gas (liquid/biogas)<br>6 = Other                   | 0.350          |
| Drinking water      | 1 = Unimproved (unprotected/surface/bottled)<br>2 = Improved but not piped<br>3 = Improved and piped into yard or private dwelling<br>4 = Other | 0.170          |
| Sanitation          | 1 = Unimproved (open defecation/hanging/open or broken pit)<br>2 = Improved but not piped                                                       | 0.374          |

1  
2  
3  
4  
5  
6  
7  
8  
9  
10  
11  
12  
13  
14  
15  
16  
17  
18  
19  
20  
21  
22  
23  
24  
25  
26  
27  
28  
29  
30  
31  
32  
33  
34  
35  
36  
37  
38  
39  
40  
41  
42  
43  
44  
45  
46  
47

|                        |                                           |       |
|------------------------|-------------------------------------------|-------|
|                        | 3 = Improved and piped sewer<br>4 = Other |       |
| Mobile phone ownership | 0 = No<br>1 = Yes                         | 0.380 |

Note: 51% of overall variance was explained by the first component.

For peer review only

**Supplemental Table 2: Using vaccination card plus maternal recall, vaccination coverage among children age 9-23 months and association with mobility status using univariate and multivariable models with modified Poisson regression**

|                                                  | Partial vaccination<br>n=518 (21%) |           | Full vaccination <sup>a</sup><br>n=1906 (79%) |           | PR <sup>b</sup> | 95% CI           | p-value          |
|--------------------------------------------------|------------------------------------|-----------|-----------------------------------------------|-----------|-----------------|------------------|------------------|
| <u>Univariate analyses</u>                       |                                    |           |                                               |           |                 |                  |                  |
| Mobility status                                  | <u>n</u>                           | <u>%</u>  | <u>n</u>                                      | <u>%</u>  |                 |                  |                  |
| Residentially stable $\geq 24$ months            | 243                                | 19        | 1053                                          | 81        | Reference       |                  |                  |
| Recently relocated $\leq 12$ months              | 275                                | 24        | 853                                           | 76        | <b>0.93</b>     | <b>0.88-0.98</b> | <b>0.009</b>     |
| Demographics                                     | <u>mean</u>                        | <u>SE</u> | <u>mean</u>                                   | <u>SE</u> |                 |                  |                  |
| Number of children <5yrs in household            | 1.31                               | 0.03      | 1.24                                          | 0.01      | <b>0.94</b>     | <b>0.89-0.99</b> | <b>0.035</b>     |
| Age of index child in months                     | 14.73                              | 0.20      | 16.35                                         | 0.11      | <b>1.02</b>     | <b>1.02-1.03</b> | <b>&lt;0.001</b> |
| Socioeconomics                                   |                                    |           |                                               |           |                 |                  |                  |
| Mother's education                               | <u>n</u>                           | <u>%</u>  | <u>n</u>                                      | <u>%</u>  |                 |                  |                  |
| No education                                     | 207                                | 41        | 303                                           | 59        | Reference       |                  |                  |
| Some schooling                                   | 121                                | 22        | 433                                           | 78        | <b>1.32</b>     | <b>1.18-1.47</b> | <b>&lt;0.001</b> |
| Finished secondary                               | 141                                | 16        | 719                                           | 84        | <b>1.41</b>     | <b>1.27-1.56</b> | <b>&lt;0.001</b> |
| > Higher secondary                               | 49                                 | 10        | 451                                           | 90        | <b>1.52</b>     | <b>1.36-1.69</b> | <b>&lt;0.001</b> |
| Occupation of household head                     |                                    |           |                                               |           |                 |                  |                  |
| Unemployed or other                              | 26                                 | 15        | 147                                           | 85        | Reference       |                  |                  |
| Daily labor                                      | 195                                | 38        | 318                                           | 62        | <b>0.73</b>     | <b>0.66-0.81</b> | <b>&lt;0.001</b> |
| Shopkeeper or merchant                           | 124                                | 19        | 538                                           | 81        | 0.96            | 0.88-1.04        | 0.287            |
| Salaried service                                 | 173                                | 16        | 903                                           | 84        | 0.99            | 0.91-1.07        | 0.752            |
| Household wealth status (PCA <sup>c</sup> )      |                                    |           |                                               |           |                 |                  |                  |
| Poorest                                          | 212                                | 40        | 321                                           | 60        | Reference       |                  |                  |
| Lower middle                                     | 114                                | 25        | 348                                           | 75        | <b>1.25</b>     | <b>1.11-1.40</b> | <b>&lt;0.001</b> |
| Middle                                           | 84                                 | 18        | 382                                           | 82        | <b>1.36</b>     | <b>1.20-1.54</b> | <b>&lt;0.001</b> |
| Upper middle                                     | 59                                 | 10        | 560                                           | 90        | <b>1.50</b>     | <b>1.34-1.69</b> | <b>&lt;0.001</b> |
| Richest                                          | 49                                 | 14        | 295                                           | 86        | <b>1.42</b>     | <b>1.26-1.61</b> | <b>&lt;0.001</b> |
| Health services knowledge                        |                                    |           |                                               |           |                 |                  |                  |
| Does <i>not</i> have knowledge of local hospital | 127                                | 28        | 324                                           | 72        | Reference       |                  |                  |
| Has knowledge of local hospital                  | 391                                | 20        | 1582                                          | 80        | <b>1.12</b>     | <b>1.05-1.19</b> | <b>&lt;0.001</b> |

1  
2  
3  
4  
5  
6  
7  
8  
9  
10  
11  
12  
13  
14  
15  
16  
17  
18  
19  
20  
21  
22  
23  
24  
25  
26  
27  
28  
29  
30  
31  
32  
33  
34  
35  
36  
37  
38  
39  
40  
41  
42  
43  
44  
45  
46  
47

| <u>Multivariable analyses with different models</u>                         |             |                  |              |
|-----------------------------------------------------------------------------|-------------|------------------|--------------|
| Mobility, adjusting for demographics (# of children and age of index child) | <b>0.93</b> | <b>0.88-0.98</b> | <b>0.007</b> |
| Mobility, adjusting for socioeconomics (education, occupation, and wealth)  | 0.96        | 0.91-1.01        | 0.136        |
| Mobility, adjusting for demographics and socioeconomics                     | 0.96        | 0.92-1.01        | 0.138        |

<sup>a</sup>Full vaccination coverage per Expanded Programme on Immunization includes 1 dose of BCG, 3 doses of polio, 3 doses of DPT, and 1 dose of measles vaccines.

<sup>b</sup>PR, Prevalence Ratio.

<sup>c</sup>Polychoric Principal Components Analysis was used to create a household wealth index including structural housing characteristics, cooking fuel, drinking water, and sanitation.

For peer review only

**Supplemental Table 3: Using vaccination card only, vaccination coverage among children age 9-23 months who have vaccination cards and association with mobility status using univariate and multivariable models with modified Poisson regression**

|                                                  | Partial vaccination<br>n=281 (19%) |           | Full vaccination <sup>a</sup><br>n=1222 (81%) |           | PR <sup>b</sup> | 95% CI           | p-value          |
|--------------------------------------------------|------------------------------------|-----------|-----------------------------------------------|-----------|-----------------|------------------|------------------|
| <u>Univariate analyses</u>                       |                                    |           |                                               |           |                 |                  |                  |
| Mobility status                                  | <u>n</u>                           | <u>%</u>  | <u>n</u>                                      | <u>%</u>  |                 |                  |                  |
| Residentially stable $\geq 24$ months            | 156                                | 18        | 715                                           | 82        | Reference       |                  |                  |
| Recently relocated $\leq 12$ months              | 125                                | 20        | 507                                           | 80        | 0.97            | 0.92-1.04        | 0.469            |
| Demographics                                     | <u>mean</u>                        | <u>SE</u> | <u>mean</u>                                   | <u>SE</u> |                 |                  |                  |
| Number of children <5yrs in household            | 1.23                               | 0.03      | 1.21                                          | 0.01      | 0.98            | 0.93-1.04        | 0.543            |
| Age of index child in months                     | 14.4                               | 0.27      | 15.9                                          | 0.15      | <b>1.02</b>     | <b>1.01-1.03</b> | <b>&lt;0.001</b> |
| Socioeconomics                                   |                                    |           |                                               |           |                 |                  |                  |
| Mother's education                               | <u>n</u>                           | <u>%</u>  | <u>n</u>                                      | <u>%</u>  |                 |                  |                  |
| No education                                     | 94                                 | 35        | 176                                           | 65        | Reference       |                  |                  |
| Some schooling                                   | 57                                 | 17        | 286                                           | 83        | <b>1.28</b>     | <b>1.15-1.42</b> | <b>&lt;0.001</b> |
| Finished secondary                               | 93                                 | 17        | 461                                           | 83        | <b>1.28</b>     | <b>1.14-1.43</b> | <b>&lt;0.001</b> |
| > Higher secondary                               | 37                                 | 11        | 299                                           | 89        | <b>1.37</b>     | <b>1.22-1.52</b> | <b>&lt;0.001</b> |
| Occupation of household head                     |                                    |           |                                               |           |                 |                  |                  |
| Unemployed or other                              | 14                                 | 12        | 100                                           | 88        | Reference       |                  |                  |
| Daily labor                                      | 89                                 | 33        | 184                                           | 67        | <b>0.77</b>     | <b>0.68-0.87</b> | <b>&lt;0.001</b> |
| Shopkeeper or merchant                           | 66                                 | 16        | 352                                           | 84        | 0.96            | 0.88-1.04        | 0.327            |
| Salaried service                                 | 112                                | 16        | 586                                           | 84        | 0.96            | 0.88-1.04        | 0.297            |
| Household wealth status (PCA <sup>c</sup> )      |                                    |           |                                               |           |                 |                  |                  |
| Poorest                                          | 84                                 | 32        | 179                                           | 68        | Reference       |                  |                  |
| Lower middle                                     | 67                                 | 24        | 211                                           | 76        | 1.12            | 0.99-1.25        | 0.062            |
| Middle                                           | 52                                 | 17        | 248                                           | 83        | <b>1.21</b>     | <b>1.08-1.37</b> | <b>0.002</b>     |
| Upper middle                                     | 42                                 | 10        | 381                                           | 90        | <b>1.32</b>     | <b>1.18-1.48</b> | <b>&lt;0.001</b> |
| Richest                                          | 36                                 | 15        | 203                                           | 85        | <b>1.25</b>     | <b>1.10-1.41</b> | <b>&lt;0.001</b> |
| Health services knowledge                        |                                    |           |                                               |           |                 |                  |                  |
| Does <i>not</i> have knowledge of local hospital | 55                                 | 22        | 194                                           | 78        | Reference       |                  |                  |
| Has knowledge of local hospital                  | 226                                | 18        | 1028                                          | 82        | 1.05            | 0.98-1.13        | 0.141            |

1  
2  
3  
4  
5  
6  
7  
8  
9  
10  
11  
12  
13  
14  
15  
16  
17  
18  
19  
20  
21  
22  
23  
24  
25  
26  
27  
28  
29  
30  
31  
32  
33  
34  
35  
36  
37  
38  
39  
40  
41  
42  
43  
44  
45  
46  
47

| <u>Multivariable analyses with different models</u>                         |      |           |       |
|-----------------------------------------------------------------------------|------|-----------|-------|
| Mobility, adjusting for demographics (# of children and age of index child) | 0.98 | 0.93-1.04 | 0.582 |
| Mobility, adjusting for socioeconomics (education, occupation, and wealth)  | 1.00 | 0.94-1.06 | 0.948 |
| Mobility, adjusting for demographics and socioeconomics                     | 1.00 | 0.95-1.07 | 0.888 |

<sup>a</sup>Full vaccination coverage per Expanded Programme on Immunization includes 1 dose of BCG, 3 doses of polio, 3 doses of DPT, and 1 dose of measles vaccines.

<sup>b</sup>PR, Prevalence Ratio.

<sup>c</sup>Polychoric Principal Components Analysis was used to create a household wealth index including structural housing characteristics, cooking fuel, drinking water, and sanitation.

For peer review only

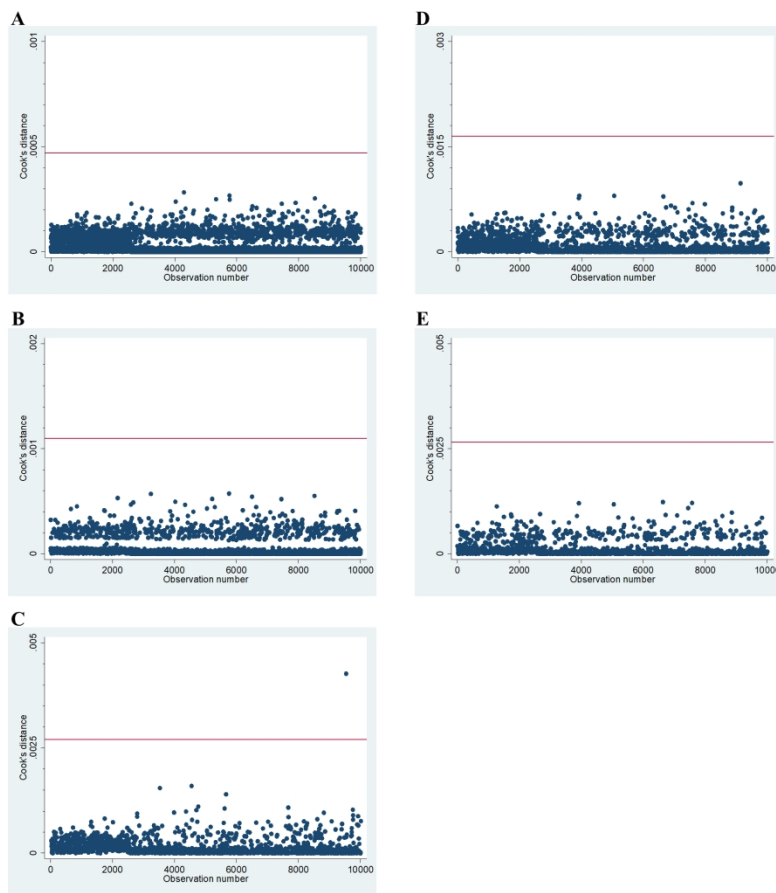

**Supplemental Figure 1: Cook's distance calculations to examine influential observations**  
 Cook's distance plots of multivariable models examining mobility, demographics, and socioeconomic factors for: vaccination using card plus maternal recall among children 9-59 months (A), vaccination using card only among children 9-59 months (B), qualified provider visits for respiratory infections among children <5 years old (C), vaccination using card plus maternal recall among children 9-23 months (D), and vaccination using card only among children 9-23 months (E). The red lines indicate threshold value of  $4/n$  where  $n$ =number of observations.

190x254mm (300 x 300 DPI)

**Effect of household relocation on child vaccination and health service utilization in Dhaka, Bangladesh: a cross-sectional community survey**

**STROBE 2007 (v4) Statement—Checklist of items that should be included in reports of *cross-sectional studies***

| Section/Topic             | Item # | Recommendation                                                                                                                                                                       | Reported on page # |
|---------------------------|--------|--------------------------------------------------------------------------------------------------------------------------------------------------------------------------------------|--------------------|
| <b>Title and abstract</b> | 1      | (a) Indicate the study’s design with a commonly used term in the title or the abstract                                                                                               | 1                  |
|                           |        | (b) Provide in the abstract an informative and balanced summary of what was done and what was found                                                                                  | 2                  |
| <b>Introduction</b>       |        |                                                                                                                                                                                      |                    |
| Background/rationale      | 2      | Explain the scientific background and rationale for the investigation being reported                                                                                                 | 4                  |
| Objectives                | 3      | State specific objectives, including any prespecified hypotheses                                                                                                                     | 6                  |
| <b>Methods</b>            |        |                                                                                                                                                                                      |                    |
| Study design              | 4      | Present key elements of study design early in the paper                                                                                                                              | 6                  |
| Setting                   | 5      | Describe the setting, locations, and relevant dates, including periods of recruitment, exposure, follow-up, and data collection                                                      | 6                  |
| Participants              | 6      | (a) Give the eligibility criteria, and the sources and methods of selection of participants                                                                                          | 7                  |
| Variables                 | 7      | Clearly define all outcomes, exposures, predictors, potential confounders, and effect modifiers. Give diagnostic criteria, if applicable                                             | 7                  |
| Data sources/ measurement | 8*     | For each variable of interest, give sources of data and details of methods of assessment (measurement). Describe comparability of assessment methods if there is more than one group | 7                  |
| Bias                      | 9      | Describe any efforts to address potential sources of bias                                                                                                                            | 8                  |
| Study size                | 10     | Explain how the study size was arrived at                                                                                                                                            | 7                  |
| Quantitative variables    | 11     | Explain how quantitative variables were handled in the analyses. If applicable, describe which groupings were chosen and why                                                         | 8                  |
| Statistical methods       | 12     | (a) Describe all statistical methods, including those used to control for confounding                                                                                                | 8                  |
|                           |        | (b) Describe any methods used to examine subgroups and interactions                                                                                                                  | 8                  |
|                           |        | (c) Explain how missing data were addressed                                                                                                                                          | 8                  |
|                           |        | (d) If applicable, describe analytical methods taking account of sampling strategy                                                                                                   | 8                  |



|                          |     |                                                                                                                                                                                                              |          |
|--------------------------|-----|--------------------------------------------------------------------------------------------------------------------------------------------------------------------------------------------------------------|----------|
|                          |     | (e) Describe any sensitivity analyses                                                                                                                                                                        | 8        |
| <b>Results</b>           |     |                                                                                                                                                                                                              |          |
| Participants             | 13* | (a) Report numbers of individuals at each stage of study—eg numbers potentially eligible, examined for eligibility, confirmed eligible, included in the study, completing follow-up, and analysed            | 9        |
|                          |     | (b) Give reasons for non-participation at each stage                                                                                                                                                         | 9        |
|                          |     | (c) Consider use of a flow diagram                                                                                                                                                                           | Figure 1 |
| Descriptive data         | 14* | (a) Give characteristics of study participants (eg demographic, clinical, social) and information on exposures and potential confounders                                                                     | 9        |
|                          |     | (b) Indicate number of participants with missing data for each variable of interest                                                                                                                          | 9        |
| Outcome data             | 15* | Report numbers of outcome events or summary measures                                                                                                                                                         | 9        |
| Main results             | 16  | (a) Give unadjusted estimates and, if applicable, confounder-adjusted estimates and their precision (eg, 95% confidence interval). Make clear which confounders were adjusted for and why they were included | 10       |
|                          |     | (b) Report category boundaries when continuous variables were categorized                                                                                                                                    | 9        |
|                          |     | (c) If relevant, consider translating estimates of relative risk into absolute risk for a meaningful time period                                                                                             | n/a      |
| Other analyses           | 17  | Report other analyses done—eg analyses of subgroups and interactions, and sensitivity analyses                                                                                                               | 10       |
| <b>Discussion</b>        |     |                                                                                                                                                                                                              |          |
| Key results              | 18  | Summarise key results with reference to study objectives                                                                                                                                                     | 11       |
| Limitations              | 19  | Discuss limitations of the study, taking into account sources of potential bias or imprecision. Discuss both direction and magnitude of any potential bias                                                   | 13       |
| Interpretation           | 20  | Give a cautious overall interpretation of results considering objectives, limitations, multiplicity of analyses, results from similar studies, and other relevant evidence                                   | 15       |
| Generalisability         | 21  | Discuss the generalisability (external validity) of the study results                                                                                                                                        | 14       |
| <b>Other information</b> |     |                                                                                                                                                                                                              |          |
| Funding                  | 22  | Give the source of funding and the role of the funders for the present study and, if applicable, for the original study on which the present article is based                                                | 17       |

\*Give information separately for cases and controls in case-control studies and, if applicable, for exposed and unexposed groups in cohort and cross-sectional studies.

**Note:** An Explanation and Elaboration article discusses each checklist item and gives methodological background and published examples of transparent reporting. The STROBE checklist is best used in conjunction with this article (freely available on the Web sites of PLoS Medicine at <http://www.plosmedicine.org/>, Annals of Internal Medicine at <http://www.annals.org/>, and Epidemiology at <http://www.epidem.com/>). Information on the STROBE Initiative is available at [www.strobe-statement.org](http://www.strobe-statement.org).

# BMJ Open

## Effect of household relocation on child vaccination and health service utilization in Dhaka, Bangladesh: a cross-sectional community survey

|                                 |                                                                                                                                                                                                                                                                                                                                                                                                                                                   |
|---------------------------------|---------------------------------------------------------------------------------------------------------------------------------------------------------------------------------------------------------------------------------------------------------------------------------------------------------------------------------------------------------------------------------------------------------------------------------------------------|
| Journal:                        | <i>BMJ Open</i>                                                                                                                                                                                                                                                                                                                                                                                                                                   |
| Manuscript ID                   | bmjopen-2018-026176.R2                                                                                                                                                                                                                                                                                                                                                                                                                            |
| Article Type:                   | Research                                                                                                                                                                                                                                                                                                                                                                                                                                          |
| Date Submitted by the Author:   | 08-Feb-2019                                                                                                                                                                                                                                                                                                                                                                                                                                       |
| Complete List of Authors:       | Horng, Lily; Stanford University, Infectious Diseases and Geographic Medicine<br>Kakoly, Nadira Sultana; International Centre for Diarrheal Disease Research, Bangladesh (icddr, b)<br>Abedin, Jaynal ; International Centre for Diarrheal Disease Research, Bangladesh (icddr, b)<br>Luby, Stephen; Stanford University, Infectious Diseases and Geographic Medicine; International Centre for Diarrheal Disease Research, Bangladesh (icddr, b) |
| <b>Primary Subject Heading</b>: | Global health                                                                                                                                                                                                                                                                                                                                                                                                                                     |
| Secondary Subject Heading:      | Epidemiology, Paediatrics, Public health, Infectious diseases                                                                                                                                                                                                                                                                                                                                                                                     |
| Keywords:                       | Community child health < PAEDIATRICS, PUBLIC HEALTH, Public health < INFECTIOUS DISEASES, Paediatric infectious disease & immunisation < PAEDIATRICS, EPIDEMIOLOGY                                                                                                                                                                                                                                                                                |
|                                 |                                                                                                                                                                                                                                                                                                                                                                                                                                                   |

SCHOLARONE™  
Manuscripts

1  
2  
3  
4  
5  
6  
7 **Effect of household relocation on child vaccination and health service utilization in**  
8 **Dhaka, Bangladesh: a cross-sectional community survey**  
9

10  
11  
12  
13 Lily M. Horng<sup>1\*</sup>, Nadira K. Sultana<sup>2</sup>, Jaynal Abedin<sup>2</sup>, Stephen P. Luby<sup>1,2</sup>

14  
15  
16 1 Division of Infectious Diseases & Geographic Medicine, Department of Medicine, Stanford  
17 University, Stanford, California, 94305, USA

18  
19  
20 2 International Centre for Diarrheal Disease Research, Bangladesh (icddr, b), Dhaka 1000,  
21 Bangladesh  
22

23  
24  
25  
26 \*Corresponding author:

27  
28 Lily M. Horng, MD MPH

29  
30 Division of Infectious Diseases and Geographic Medicine,  
31 Stanford University, Stanford, California, 94305, USA

32  
33 +16507212730

34  
35  
36 lhorng@stanford.edu  
37

38  
39  
40  
41 Word count (excluding title page, abstract, references, figures and tables): 4,303 words  
42  
43  
44  
45  
46  
47  
48  
49  
50  
51  
52  
53  
54  
55  
56  
57  
58  
59  
60

## Abstract

**Objective** To explore the relationship between household relocation and use of vaccination and health services for severe acute respiratory illness (ARI) among children in Dhaka, Bangladesh.

**Design** Analysis of cross-sectional community survey data from a prior study examining the impact of *Haemophilus influenzae* type b vaccine introduction in 2009 on meningitis incidence in Bangladesh.

**Setting** Communities surrounding two large pediatric hospitals in Dhaka, Bangladesh.

**Participants** Households with children under 5 years old who either recently relocated  $\leq 12$  months or who were residentially stable living  $\geq 24$  months in their current residence (total n = 10,020) were selected for this study.

**Primary outcome measures** Full vaccination coverage among 9-59 month old children and visits to a qualified medical provider for severe ARI among children under 5 years old.

**Results** Using vaccination cards with maternal recall, full vaccination was 80% among recently relocated children (n=3,795) and 85% among residentially stable children (n=4,713;  $\chi^2=37.2$ ,  $p<0.001$ ). Among children with ARI in the prior year, 69% of recently relocated children (n=695) had visited a qualified provider compared to 82% of residentially stable children (n=763;  $\chi^2=31.9$ ,  $p<0.001$ ). After adjusting for demographic and socioeconomic characteristics, recently relocated children were less likely to be fully vaccinated (prevalence ratio [PR] 0.97; 95% confidence interval [CI] 0.95-0.99;  $p=0.016$ ) and to have visited a qualified provider for ARI (PR 0.88; 95% CI 0.84-0.93;  $p<0.001$ ).

**Conclusions** Children in recently relocated households in Dhaka, Bangladesh have decreased use of vaccination and qualified health services for severe acute respiratory illnesses.

## Strengths and limitations of this study

- This study examined a rich dataset from prior community surveys in Dhaka, Bangladesh to explore associations between household relocation and utilization of vaccination and qualified child health services.
- Vaccination was evaluated using different measurements and age ranges to explore trends in the relationship between mobility and vaccination.
- Effect of household relocation on use of child health services was found even after adjusting for socioeconomic factors known to impact health-seeking behavior.
- Limitations include lack of detailed data on mobility patterns and costs of health services.

## Introduction

Pneumonia or acute respiratory illness (ARI) is the leading cause of death globally in children under 5 years old, and lower respiratory tract infections caused an estimated 652,572 child deaths in 2016.[1] Many causes of ARI are preventable by vaccines such as *Streptococcus pneumoniae* (attributed to 52% of global pneumonia child deaths) and *Haemophilus influenzae* type b (Hib) (7% of deaths).[1] The majority of the world's population now lives in urban areas, and this population is expected to grow from 54% in 2014 to 66% in 2050, an estimated increase of 2.5 billion people.[2,3] With this increase, 90% of growth is projected in Asia and Africa.[3] The population living in urban slums is also expected to increase from 881 million in 2014 to 2 billion in 2030, in large part due to rural-urban migration.[2,4]

In many low- and middle-income countries, vaccination and childhood mortality rates among urban poor are worse than among other urban groups and even rural populations.[5,6] In addition, residents of slums have poor health outcomes due to lack of reliable access to housing, clean water, sanitation, education, and health services.[4,5,7–9] In Nigeria, a 2010 study examining 2003 Demographic and Health Survey data of 6,029 children 12 months and older found full immunization among 24.3% of rural non-migrant, 15.2% of urban non-migrant, and 8.5% of rural-urban migrant children.[10] In Bangladesh, a comparison study of the 2013 Urban Health Survey and 2014 Demographic and Health Survey found under-5 child mortality rates of 46 per 1,000 livebirths nationally, 41 in Dhaka, 49 in rural areas, and 57 in urban slums.[5] One recent systematic review found community factors associated with vaccination coverage in the urban poor included socio-economic characteristics, vaccination knowledge and beliefs, access to care, and recent rural-urban migration.[6]

Residential mobility has been recognized as an important contributor to healthcare use in high-income countries, with relocation associated with decreased use of preventive and curative services.[11,12] One study using a 1998 United States national health survey found that duration, distance, and frequency of moving were all predictors of decreased use of child

1  
2  
3 health services even after accounting for sociodemographic factors. Households who had  
4 moved within 12 months accessed fewer preventive child health services compared to  
5 households living in their current residence over 36 months (odds ratio 3.1, 95% confidence  
6 interval [CI] 2.5-3.7).[12] Recently relocated households also accessed fewer curative  
7 services (odds ratio 3.3, 95% CI 2.6-4.2).[12] Frequent moving also impacted children's long-  
8 term cognitive function and behavioral problems into adulthood.[13] Moving can impact  
9 health through various social determinants. In one conceptual framework by the World Health  
10 Organization (WHO), structural determinants of social, economic, and political contexts  
11 influence intermediary determinants of material, behavioral, psychosocial, and health system  
12 factors that ultimately shape an individual's health.[14] Relocation can improve an  
13 individual's socioeconomic position in the long term, but mobility often disrupts material  
14 resources, psychosocial support, and health care access.

15  
16  
17  
18  
19  
20  
21  
22  
23  
24  
25  
26  
27  
28  
29  
30  
31  
32  
33  
34  
35  
36  
37  
38  
39  
40  
41  
42  
43  
44  
45  
46  
47  
48  
49  
50  
51  
52  
53  
54  
55  
56  
57  
58  
59  
60

Few studies examine mobility and healthcare utilization in low- and middle-income countries despite high population relevance: approximately 43% of urban residents in middle-income countries and 78% in low-income countries live in slums.[3,4,6,10,15,16] In the 2010 Nigeria study, urban non-migrant children had 1.7 times higher odds of being fully immunized than rural-urban migrants (univariate odds ratio [OR] 1.67, 95% confidence interval [CI] 1.20-2.32).[10] This association between migration and immunization was independent of demographic factors, but was attenuated and partially explained by socioeconomic characteristics and maternal healthcare utilization in multivariable analyses.[10] In this Nigeria study, migrant status was defined as moving within 10 years.[10] A 2010 cross-sectional survey in India examined 746 rural-urban migrant mothers with children under 2 years old: 339 were 'recent' migrants who moved to Delhi within 5 years and 407 were 'settled' migrants in Delhi at least 5 years.[16] For age-appropriate children, 81% of settled migrants and 64% of recent migrants were fully immunized per national guidelines.[16] Settled migrant children had 1.9 times higher odds of being fully immunized

1  
2  
3 than recent migrants after adjusting for demographics, socioeconomics, and maternal  
4  
5 healthcare utilization (adjusted OR 1.93, 95% CI 1.18-3.14).[16]  
6

7 Studying urban health services in Bangladesh is useful because Bangladesh is the  
8  
9 world's most densely populated country that is not a city-state: the population of the capital  
10  
11 Dhaka will increase from an estimated 16 to 27 million by 2030.[3,17] Furthermore, the  
12  
13 government has a strong national Expanded Programme on Immunization and active health  
14  
15 systems research.[17,18] In 2011, full vaccination rates among children age 12-23 months  
16  
17 were 80% nationally in Bangladesh, 75% in Dhaka, but only 43-67% in Dhaka slums.[17-21]  
18  
19 Prior studies found that household turnover was as high as 50% in one year, comprehensive  
20  
21 provider-led vaccination interventions were effective but too expensive to sustain, and street  
22  
23 children were very hard to reach with interventions in Dhaka.[19,22,23]  
24  
25

26 To explore the relationship between residential mobility and healthcare utilization in  
27  
28 Dhaka, we used data from a study showing Hib vaccine introduction into Bangladesh's  
29  
30 Expanded Programme on Immunization in 2009 dramatically reduced rates of Hib meningitis  
31  
32 and purulent meningitis in children.[24] We conducted secondary analysis of the Hib impact  
33  
34 study's community survey data to determine whether recently relocated children were: 1) less  
35  
36 likely to be fully vaccinated per Expanded Programme on Immunization guidelines and 2)  
37  
38 less likely to use qualified health services for severe acute respiratory illness than residentially  
39  
40 stable children.  
41  
42  
43  
44

## 45 Methods

### 46 Study design and setting

47  
48  
49 Hib conjugate vaccine was introduced into Bangladesh's Expanded Programme on  
50  
51 Immunization in 2009, and the Hib impact study conducted pre and post-vaccine surveillance  
52  
53 of meningitis in children under 5 years old using hospital records and community surveys  
54  
55 surrounding two large pediatric hospitals in Dhaka: Dhaka Shishu and Shishu Shastya  
56  
57  
58  
59  
60



1  
2  
3 Foundation Hospital.[24] Field researchers consecutively enrolled 100 children discharged  
4 with a diagnosis of meningitis and/or encephalitis from the two study hospitals, visited  
5 households, and recorded household geographical positional system coordinates. The  
6 catchment area was defined as the area containing >80% of households with children  
7 discharged with meningitis and within one hour of transport to either hospital. Field teams  
8 divided the catchment area into 1,748 equal-sized rectangles and randomly selected 100  
9 rectangles as clusters. Teams surveyed each household with a child under 5 years old within  
10 98 clusters. Two clusters were within a military cantonment, thus inaccessible. Households  
11 were asked about: 1) routine vaccinations using vaccination cards and maternal recall and 2)  
12 healthcare use for children with illnesses in the prior 12 months suggestive of  
13 meningoencephalitis defined as: any serious illness with acute onset of fever with either  
14 convulsions or unconsciousness or altered mental status.[24] Data were collected one year  
15 before (2008) and after (2010) Hib vaccine introduction.  
16  
17  
18  
19  
20  
21  
22  
23  
24  
25  
26  
27  
28  
29  
30  
31  
32  
33

### 34 **Study population**

35 We used the Hib impact study's pre-vaccine community surveillance data and  
36 included children based on mobility status: 1) children living in their current residence  $\leq$  12  
37 months who we classified as "recently relocated" and 2) children living  $\geq$  24 months in their  
38 current residence who we classified as "residentially stable". This definition of  
39 mobility/migration status has been used in prior studies.[6,12] We excluded children living in  
40 their current residence 13-23 months who we classified as "intermediately mobile".  
41  
42  
43  
44  
45  
46  
47  
48  
49

### 50 **Study outcomes**

51 Our two primary outcomes focused on healthcare utilization: 1) full vaccination  
52 among 9-59 month old children and 2) visit to a qualified medical provider among children  
53 under 5 years old who had severe acute respiratory illness symptoms within the prior 12  
54 months. We defined full vaccination per Bangladesh Expanded Programme on Immunization  
55  
56  
57  
58  
59  
60

1  
2  
3 guidelines in 2008 (before Hib vaccine): 1 dose of Bacillus Calmette-Guérin (BCG) vaccine  
4 against tuberculosis; 3 doses of combined vaccine against diphtheria, pertussis, and tetanus  
5 (DPT); 3 doses of oral polio vaccine (excluding polio vaccine given at birth); and 1 dose of  
6 measles vaccine. Government guidelines recommended children to receive all these  
7 vaccinations before 9 months of age. Any doses of pentavalent vaccine, which includes  
8 diphtheria, pertussis, tetanus, hepatitis B, and Hib, were included in vaccination analyses. We  
9 defined severe acute respiratory illness as cough or difficulty breathing plus any danger sign:  
10 stridor, chest in-drawing, difficulty drinking/ breastfeeding, vomiting, cyanosis, convulsions,  
11 lethargy, or unconsciousness. We defined a qualified medical provider as having a Bachelor  
12 of Medicine degree or higher.  
13  
14  
15  
16  
17  
18  
19  
20  
21  
22  
23  
24  
25  
26

### 27 **Data analysis**

28 We compared sociodemographic and health characteristics between residentially  
29 stable and recently relocated households. For continuous variables, we calculated means with  
30 standard errors and t-tests adjusting for cluster. For categorical variables, we calculated  
31 percentages and  $\chi^2$ -tests. To construct a wealth index, we used polychoric principal  
32 components analysis (PCA) including: housing (number of rooms; free, rental, or owned  
33 housing; main material of roof, walls, and floors), cooking fuel, drinking water, sanitation,  
34 and mobile phone ownership.[25–27] We then divided households into wealth quintiles. We  
35 did not include durable assets such as furniture items because ownership of these goods could  
36 be associated with duration of residency.  
37  
38  
39  
40  
41  
42  
43  
44  
45  
46

47 To examine the magnitude of association between mobility and study outcomes of  
48 vaccination and visit to a qualified provider for severe ARI, we used modified Poisson  
49 regression with robust cluster variance to estimate prevalence ratios (PRs).[28,29] We chose  
50 modified Poisson regression to model prevalence ratios for common binary outcomes because  
51 logistic regression is more applicable to rare outcomes and because log-binomial regression  
52 models may fail to converge. We conducted univariate analyses to estimate individual effects  
53  
54  
55  
56  
57  
58  
59  
60

1  
2  
3 of mobility, demographics, socioeconomics, and health services knowledge (i.e. knowledge of  
4 local hospital) on healthcare utilization. Missing data regarding main study outcome of acute  
5 respiratory illness were handled through listwise deletion. Given large number of missing  
6 vaccination cards, we analyzed vaccination in two ways: 1) using vaccination cards plus  
7 maternal recall and 2) using vaccination cards alone. We conducted multivariable analyses  
8 examining the association between mobility and healthcare utilization, adjusting for  
9 demographics and socioeconomics known to influence health-seeking behavior.[9,16,30–32]  
10  
11 Regression diagnostics included checks for influential observations with Cook's distance  
12 calculations.  
13  
14  
15  
16  
17  
18  
19  
20  
21  
22  
23  
24

## 25 **Ethics**

26  
27  
28 The Ethical Review Committee of the International Centre for Diarrhoeal Disease  
29 Research, Bangladesh (icddr,b) reviewed and approved the study protocol. Written informed  
30 consent was obtained from all participants before taking part in the initial Hib impact study.  
31  
32  
33  
34  
35

## 36 **Patient and public involvement**

37  
38 No participants were directly involved in development of the research questions and  
39 outcomes. No participants were involved in the design or conduct of the study. There are no  
40 plans to disseminate the results of the research individually to study participants.  
41  
42  
43  
44  
45  
46

## 47 **Results**

48  
49 We surveyed a total of 10,720 households with children less than 5 years old: 42% of  
50 households had recently relocated within 12 months, 51% were residentially stable living in  
51 their current residence over 24 months, and 7% were intermediately mobile (Figure 1). We  
52 excluded from subsequent analyses 700 children living in their current residence 13-23  
53 months and classified as intermediately mobile. For the healthcare utilization analysis, 1,458  
54  
55  
56  
57  
58  
59  
60

1  
2  
3 children had severe ARI symptoms within the 12 months prior to survey. For the vaccination  
4 analysis, 8,508 children were age 9-59 months and thus should have completed all Expanded  
5 Programme on Immunization-recommended vaccinations. Household demographics, parental  
6 education, occupation, and hospital knowledge were available for all households. Missing  
7 data included: income for 12 households, meningitis symptoms for 3 children, respiratory  
8 illness symptoms for 1 child, and vaccination cards for 4,859 children age 9-59 months.  
9  
10  
11  
12  
13  
14

15  
16 Recently relocated families had smaller households, less education, less wealth, and  
17 less knowledge of the local hospital compared to residentially stable families (Table 1).  
18 Recently relocated families were poorer: 24% earned less than 5,000 Bangladeshi taka (US  
19 \$73) per month compared to 18% of residentially stable families. For the wealth index  
20 analysis, the first principal component accounted for 51% of overall variance, with largest  
21 contributions from roof and floor materials, sanitation, and mobile phone ownership  
22 (Supplemental Table 1). Among recently relocated families, 48% were in the two lowest  
23 wealth quintiles compared to 37% of residentially stable families. Fewer recently relocated  
24 caregivers had knowledge of the local hospital, 76%, compared to residentially stable  
25 caregivers, 85% ( $\chi^2=142.3$ ,  $p<0.001$ ). Similar rates of illness in the 12 months prior to survey  
26 were reported by all households: 14-15% of children with symptoms of severe ARI and 3-4%  
27 with symptoms of meningitis/encephalitis.  
28  
29  
30  
31  
32  
33  
34  
35  
36  
37  
38  
39  
40

41 Full vaccination coverage measured by vaccination card plus maternal recall was  
42 83% among all children age 9-59 months (Table 2). Full vaccination was 80% among recently  
43 relocated children and 85% among residentially stable children (univariate PR 0.94, 95% CI  
44 0.91-0.97,  $p<0.001$ ). Vaccination was lower in households with more children and younger  
45 children. Socioeconomic factors, especially mother's education, had the strongest association  
46 with vaccination. In multivariable analyses, recently relocated children were 3% less likely  
47 than residentially stable children to be fully vaccinated even after adjusting for demographic  
48 and socioeconomic factors (multivariable PR 0.97, 95% CI 0.95-0.99,  $p=0.016$ ).  
49  
50  
51  
52  
53  
54  
55  
56  
57  
58  
59  
60

Vaccination was also analyzed using only vaccination cards (Table 3). At time of survey, only 43% of all children had vaccination cards available. Fewer recently relocated children had vaccination cards, 36%, compared to 48% of residentially stable children ( $\chi^2=126.9$ ,  $p<0.001$ ). Younger children were more likely to have cards than older children: 62% of children 9-23 months old had vaccination cards as compared to 38% of children 24-59 months old ( $\chi^2=505.7$ ,  $p<0.001$ ). Full vaccination per vaccination card was 83% among recently relocated children and 86% among residentially stable children (univariate PR 0.97, 95% CI 0.93-1.00,  $p=0.083$ ). The 9-59 month age range for vaccination analysis allowed inclusion of a larger sample size of children vulnerable to vaccine-preventable disease. In contrast, routine vaccination schedules focus on children  $<2$  years old and full vaccination coverage per Expanded Programme on Immunization in Bangladesh and many other countries is defined in children up to 23 months old.[18,33] Narrowing the age range of vaccination analysis to 9-23 months showed similar results although with smaller sample sizes limiting statistical power to detect mobility-vaccination associations (Supplementary Tables 2 and 3). In addition, using a 10-month age minimum to account for potential delay in measles vaccination recommended at 9 months old showed the same results as a 9-month age cutoff (data not shown). Checking for influential observations with Cook's distances identified no outliers in vaccination analyses (Supplemental Figure 1).[34]

Among all children under 5 years old with severe ARI in the past year, 75% visited a qualified medical provider (Table 4). Fewer recently relocated children with severe ARI saw a qualified provider, 69%, as compared to 82% of residentially stable children (univariate PR 0.84, 95% CI 0.79-0.90,  $p<0.001$ ). Socioeconomic factors, especially household wealth, were strongly associated with qualified provider visits.

Health services knowledge was also strongly associated with acute healthcare visits: 80% of parents who knew about the local hospital sought ARI treatment from a qualified provider as compared to 51% of parents who did *not* have knowledge of the local hospital (univariate PR 1.57, 95% CI 1.34-1.85,  $p<0.001$ ). After adjusting for demographic and

1  
2  
3 socioeconomic factors, recently relocated households were 11% less likely than residentially  
4 stable households to visit a qualified medical provider for children with severe ARI  
5 (multivariable PR 0.88, 95% CI 0.84-0.93,  $p < 0.001$ ). One outlier was identified by Cook's  
6 distances in healthcare utilization analyses (Supplemental Figure 1). Excluding this outlier  
7 and using robust error variance resulted in similar results to those presented (data not shown).  
8  
9  
10  
11  
12  
13  
14  
15

## 16 Discussion

17  
18 Recently relocated households were less likely to use both acute and preventive child  
19 healthcare services in our study in Dhaka, Bangladesh, and these findings support prior  
20 literature exploring the effects of mobility on healthcare utilization.[6,10–13,16] Household  
21 relocation had a strong association with decreased use of qualified medical services for severe  
22 acute respiratory illness. Similarly, household relocation was associated with decreased  
23 vaccination rates although this relationship was less robust. Another key finding was that  
24 recently relocated parents were less knowledgeable about the local hospital compared to  
25 residentially stable parents, and knowledge of the local hospital had as strong an association  
26 with acute healthcare visits as some economic factors. Overall, recently relocated children in  
27 our study had slightly lower vaccination rates and markedly lower use of acute healthcare  
28 services for ARI than residentially stable children.  
29  
30  
31  
32  
33  
34  
35  
36  
37  
38  
39  
40

41 Study strengths include data focused on urban Bangladesh and exploring vaccination  
42 status using different measurements as well as adjusting for socioeconomic factors when  
43 examining mobility and health service utilization. Our study used the Hib impact study's  
44 rigorous community surveillance data of households living close to tertiary care pediatric  
45 hospitals in Dhaka. Dhaka residents have high mobility and many options for healthcare.  
46 Unlike in rural areas, physical access to health services is usually *not* a barrier to healthcare  
47 use in urban areas. One study found almost all residents in Dhaka lived within 1 kilometer of  
48 primary health services.[35] Routine immunizations are provided free by the government of  
49 Bangladesh, but acute care services require out of pocket expenditures which can be a barrier  
50  
51  
52  
53  
54  
55  
56  
57  
58  
59  
60

1  
2  
3 to access. Our findings on mobility and child health services use in Dhaka could inform  
4  
5 health services work in other urban low- and middle-income country contexts.[3,5]  
6

7 We analyzed vaccination using vaccination card data augmented with maternal recall,  
8  
9 vaccination card data only, and several different age ranges. Accurately measuring  
10  
11 vaccinations in children is a known difficulty in public health programs and research studies,  
12  
13 especially in low- and middle-income countries where vaccination cards are frequently *not*  
14  
15 available. Some studies have found poor agreement between parental recall, vaccination  
16  
17 cards, and even official health records.[36–38] By contrast, other studies have found good  
18  
19 correlation between maternal report and vaccination cards, and maternal recall is routinely  
20  
21 used in Demographic and Health Surveys and Multiple Indicator Cluster Surveys.[39,40]  
22  
23 Maternal recall can overestimate or underestimate vaccination history based on education,  
24  
25 social desirability bias, and vaccine-specific knowledge. Vaccination card retention itself can  
26  
27 be affected by parental education, household wealth, age of child, and even household  
28  
29 relocation. Our data showed more missing cards among recently relocated households and in  
30  
31 older children, thus those groups are subject to more maternal recall bias. Using only  
32  
33 vaccination cards or narrower age ranges in our vaccination analyses resulted in smaller  
34  
35 sample sizes which limited statistical power, but all analyses showed similar effect estimates  
36  
37 of increased mobility associated with decreased vaccination. Moreover, the association  
38  
39 between increased household relocation and decreased health services use was still seen even  
40  
41 after adjusting for socioeconomic factors known to impact healthcare use.  
42  
43  
44

45 Study limitations include lack of data on mobility patterns and health services costs.  
46  
47 Information on households' prior residences, distances moved, or frequency of moving was  
48  
49 not available in our dataset. Households moving from rural Bangladesh to urban Dhaka,  
50  
51 moving long distances, or relocating frequently probably have less knowledge and therefore  
52  
53 use of locally available health services.[12] Several studies show that recent rural to urban  
54  
55 migration is associated with lower vaccination coverage in children.[6,10,16] Lack of data on  
56  
57 mobility patterns in our study precludes evaluation of how magnitude of relocation affected  
58  
59  
60

1  
2  
3 healthcare use. Our findings likely underestimate the negative association between mobility  
4 and healthcare utilization for households with large migration such as rural to urban migrants  
5 as compared to households with intra-Dhaka relocation where one would expect minimal  
6 change in health-seeking behavior. We were also unable to examine household relocation  
7 timing in relation to healthcare use. Recently relocated households were not asked if  
8 healthcare visits occurred before or after moving. Healthcare visits before moving would not  
9 be relevant to how mobility affects use of health services after moving. Our findings may  
10 underestimate the negative association between mobility and health-seeking behavior because  
11 our data included healthcare visits before moving which were unrelated to knowledge of the  
12 new geographic area. Timing of healthcare visits in relation to acquiring knowledge of  
13 hospital services was also not available, thus there may be reverse causality of recently  
14 relocated households gaining knowledge of local providers after seeking care. Ultimately, our  
15 results show a modest overall association between mobility and healthcare use which could be  
16 elucidated by asking about migration patterns including timing of use of health services.  
17  
18  
19  
20  
21  
22  
23  
24  
25  
26  
27  
28  
29  
30  
31

32 Our study results may not be as generalizable to populations in urban areas without  
33 tertiary care hospitals. Our sampling scheme focused on community catchment areas  
34 surrounding tertiary care pediatric hospitals. Advantages of this study design were that it  
35 allowed examination of healthcare utilization for severe disease since advanced services were  
36 available within a small physical distance. In addition, it was a low-cost way to examine  
37 population-level mobility instead of more resource-intensive active surveillance of migrant  
38 populations. However, use of health services generally increases with geographic proximity,  
39 and studies show this relationship is influenced by many factors including income and slum  
40 versus non-slum locations.[35,41] Recently relocated populations may be even more  
41 influenced by proximity than residentially stable populations because of fewer socioeconomic  
42 resources and lack of knowledge of health services. This would bias our results towards  
43 higher rates of health-seeking behavior among recently relocated households. Recently  
44 relocated households in areas without tertiary care services may use health services less  
45  
46  
47  
48  
49  
50  
51  
52  
53  
54  
55  
56  
57  
58  
59  
60



1  
2  
3 because of transport costs and lack of knowledge of health facilities physically distant. In  
4  
5 addition, our study included participants who relocated into the study area, but not people  
6  
7 who left the study area. In-migrants and out-migrants may be different in their healthcare  
8  
9 utilization patterns, which could also affect generalizability.  
10

11 Our dataset did not contain cost of services, which is a well-known barrier to  
12  
13 healthcare use.[20,21,31] Although vaccinations are provided for free, some non-  
14  
15 governmental and private organizations charge fees for patient registration. Even small fees  
16  
17 could have lowered vaccination rates. Cost of services, willingness to pay, and underlying  
18  
19 finances are strongly linked, thus adjusting for socioeconomic factors of parental education  
20  
21 and wealth in our models should have incorporated some cost effects on healthcare use.  
22  
23 However, costs could affect recently relocated households disproportionately more than  
24  
25 residentially stable households of the same socioeconomic status. One could hypothesize that  
26  
27 immediately after relocating, families would first spend money on household goods before  
28  
29 preventive medicine fees. Without cost data, we can still conclude from our analysis that  
30  
31 increased mobility is associated with decreased healthcare use, but we have limited  
32  
33 understanding of mechanisms through which mobility affects healthcare use.  
34  
35

36  
37 Barriers and delays to using appropriate healthcare services increase mortality.[31,42]  
38  
39 One study in India of 290 children hospitalized for pneumonia in a tertiary care center found  
40  
41 that delayed hospital referral, defined as three or more days between symptom onset and  
42  
43 hospitalization, was associated with increased mortality (OR 52.1, 95% CI 6.7-402.4,  
44  
45  $p < 0.001$ ) after adjusting for age, residence in slum, and illness severity.[42] In this study,  
46  
47 incomplete immunization was also associated with increased mortality (OR 12.3, 95% CI 2.2-  
48  
49 69.9,  $p = 0.005$ ).[42] Reasons for delayed care-seeking can include access and cost. While cost  
50  
51 does influence healthcare use, parents of sick children usually do seek some treatment. In the  
52  
53 2014 Bangladesh Demographic and Health Survey, 52% of urban parents with children with  
54  
55 ARI symptoms in the 2 weeks prior to survey sought treatment from a health facility, 23%  
56  
57 went to pharmacies, and 12% went to traditional practitioners.[43] Only 12% of parents with  
58  
59  
60

1  
2  
3 sick children sought no health care treatment at all.[43] While cost does not seem a large  
4  
5 barrier to seeking any treatment at all, cost likely influences choice of health provider.  
6

7 Household relocation disrupts prior relationships with healthcare providers and  
8  
9 results in lack of familiarity with local services. Studies show that continuity of care is  
10  
11 associated with increased vaccination, fewer emergency department visits, and decreased  
12  
13 hospitalization among children.[12,44–46] People usually move to new areas because of pre-  
14  
15 existing social connections through family, friends, or work.[7,47] These social contacts can  
16  
17 act as pathways of important local knowledge, including health services, but recently  
18  
19 relocated households have fewer social contacts and access fewer information sources. Other  
20  
21 studies have also found that parental attitudes and knowledge are critical factors contributing  
22  
23 to use of health services.[6,48–51] One literature review found that *practical* knowledge  
24  
25 about vaccination schedule, timing, and logistics had a stronger association with vaccination  
26  
27 uptake than scientific knowledge of vaccine names or biologic actions.[50] One study in India  
28  
29 of 210 residents in slums and 100 migrant families of construction workers found 28% of  
30  
31 slum residents and 64% of migrants identified lack of knowledge of place or time of services  
32  
33 as a reason for decreased immunization.[51] Our study did not ask specifically about  
34  
35 knowledge of vaccination services, but future research on knowledge of services could help  
36  
37 elucidate how to connect new migrants to care.  
38  
39  
40

41 Our finding that recently relocated children in Dhaka use fewer qualified health  
42  
43 services compared to residentially stable children sheds light on health barriers faced by a  
44  
45 growing population of children living in urban centers of low- and middle-income countries.  
46  
47 Rigorous community surveillance in hospital catchment areas allows for increased  
48  
49 understanding of factors affecting access to and use of healthcare services. Policymakers  
50  
51 working to improve urban child health could invest in accurate counting of children living in  
52  
53 communities with high household turnover in order to connect recently relocated households  
54  
55 to already existing local health services. Further studies by researchers on patterns and  
56  
57 mechanisms through which mobility affects healthcare use could inform critical intervention  
58  
59  
60

1  
2  
3 points. Ultimately, cost-effective and targeted interventions to increase appropriate healthcare  
4 use among recently relocated children could improve health of future urban populations.  
5  
6  
7  
8

### 9 **Contributors**

10  
11 SL was the Principal Investigator and involved in every aspect of the study from  
12 conceptualization to data analysis to manuscript writing and submission. NS, JA, and LH  
13 were involved in data analysis, and LH drafted the written work. All authors collaborated on  
14 and approved the final manuscript.  
15  
16  
17  
18  
19

### 20 **Competing interests**

21  
22 None declared.  
23  
24  
25  
26  
27

### 28 **Provenance and peer review**

29  
30 Not commissioned; externally peer reviewed.  
31  
32  
33  
34

### 35 **Ethical considerations**

36  
37 The Ethical Review Committee of the International Centre for Diarrhoeal Disease  
38 Research, Bangladesh (icddr,b) reviewed and approved the study protocol.  
39  
40  
41  
42

### 43 **Participant consent**

44  
45 Written informed consent was obtained from all participants before taking part in the  
46 initial Hib impact study.  
47  
48  
49  
50

### 51 **Funding**

52  
53 The original Hib impact study data collection was funded by the Bill and Melinda  
54 Gates Foundation and the GAVI Hib Initiative (GR-00580). No additional funding was  
55 provided for this study.  
56  
57  
58  
59  
60

### Data sharing

Data are available by emailing the corresponding author LH at [lhong@stanford.edu](mailto:lhong@stanford.edu).

### Acknowledgements

The authors thank study participants, field researchers, and collaborative partners of the Hib impact study who included Dhaka Shishu microbiology laboratories and the Johns Hopkins Bloomberg School of Public Health. icddr,b is grateful to the Bangladesh, Canada, Sweden and the United Kingdom governments for providing core/unrestricted support.

## References

- 1 Troeger C, Blacker B, Khalil IA, *et al.* Estimates of the global, regional, and national morbidity, mortality, and aetiologies of lower respiratory infections in 195 countries, 1990–2016: a systematic analysis for the Global Burden of Disease Study 2016. *Lancet Infect Dis* 2018;**18**:1191–210. doi:10.1016/S1473-3099(18)30310-4
- 2 UN-Habitat. *World Cities Report 2016: Urbanization and Development – Emerging Futures*. New York: UN-Habitat 2016. <https://unhabitat.org/books/world-cities-report/> (accessed 12 Jan 2019).
- 3 United Nations, Department of Economic and Social Affairs, Population Division. *World Urbanization Prospects: The 2014 Revision [Highlights]*. New York: United Nations 2015. <http://esa.un.org/unpd/wup/Publications/Files/WUP2014-Highlights.pdf> (accessed 3 Feb 2016).
- 4 UN-Habitat. *The challenge of slums: global report on human settlements 2003*. New York: UN-Habitat 2003.
- 5 Ezeh A, Oyebo O, Satterthwaite D, *et al.* The history, geography, and sociology of slums and the health problems of people who live in slums. *The Lancet* 2017;**389**:547–58. doi:10.1016/S0140-6736(16)31650-6
- 6 Crocker-Buque T, Mindra G, Duncan R, *et al.* Immunization, urbanization and slums – a systematic review of factors and interventions. *BMC Public Health* 2017;**17**:556. doi:10.1186/s12889-017-4473-7
- 7 Rashid SF. Strategies to reduce exclusion among populations living in urban slum settlements in Bangladesh. *J Health Popul Nutr* 2009;**27**:574–86.
- 8 UN-Habitat. *State of the World's Cities 2006/7*. New York: : UN-Habitat 2006.
- 9 Unger A. Children's health in slum settings. *Arch Dis Child* 2013;**98**:799–805. doi:10.1136/archdischild-2011-301621
- 10 Antai D. Migration and child immunization in Nigeria: individual-and community-level contexts. *BMC Public Health* 2010;**10**:116.
- 11 Jelleyman T, Spencer N. Residential mobility in childhood and health outcomes: a systematic review. *J Epidemiol Community Health* 2008;**62**:584–92.
- 12 Fowler MG, Simpson GA, Schoendorf KC. Families on the move and children's health care. *Pediatrics* 1993;**91**:934–40.
- 13 Wood D, Halfon N, Scarlata D, *et al.* Impact of family relocation on children's growth, development, school function, and behavior. *JAMA* 1993;**270**:1334–8.
- 14 World Health Organization. *A conceptual framework for action on the social determinants of health*. Geneva: WHO 2010. [http://apps.who.int/iris/bitstream/10665/44489/1/9789241500852\\_eng.pdf](http://apps.who.int/iris/bitstream/10665/44489/1/9789241500852_eng.pdf) (accessed 27 Feb 2017).
- 15 Awoh AB, Plugge E. Immunisation coverage in rural–urban migrant children in low and middle-income countries (LMICs): a systematic review and meta-analysis. *J Epidemiol Community Health* 2016;**70**:305–11.

- 1  
2  
3 16 Kusuma YS, Kumari R, Pandav CS, *et al.* Migration and immunization: determinants of  
4 childhood immunization uptake among socioeconomically disadvantaged migrants in  
5 Delhi, India. *Trop Med Int Health* 2010;**15**:1326–32.  
6  
7 17 NIPORT, icddr,b, MEASURE Evaluation. Bangladesh Urban Health Survey 2013 Final  
8 Report. 2015. <http://www.cpc.unc.edu/measure/resources/publications/tr-15-117>  
9 (accessed 3 Feb 2016).  
10  
11 18 Government of Bangladesh. Bangladesh EPI coverage evaluation survey 2011, Expanded  
12 Programme on Immunization. 2011.  
13 [http://www.dghs.gov.bd/images/docs/EPI/CES%20Reports/EPI%20Coverage%20Evalua](http://www.dghs.gov.bd/images/docs/EPI/CES%20Reports/EPI%20Coverage%20Evaluation%20Survey%202011.pdf)  
14 [tion%20Survey%202011.pdf](http://www.dghs.gov.bd/images/docs/EPI/CES%20Reports/EPI%20Coverage%20Evaluation%20Survey%202011.pdf)  
15  
16 19 Hayford K, Uddin MJ, Koehlmoos TP, *et al.* Cost and sustainability of a successful  
17 package of interventions to improve vaccination coverage for children in urban slums of  
18 Bangladesh. *Vaccine* 2014;**32**:2294–9. doi:10.1016/j.vaccine.2014.02.075  
19  
20 20 Uddin MJ, Larson CP, Oliveras E, *et al.* Child immunization coverage in urban slums of  
21 Bangladesh: impact of an intervention package. *Health Policy Plan* 2010;**25**.  
22 doi:10.1093/heapol/czp041  
23  
24 21 Perry H, Weierbach R, Hossain I, *et al.* Childhood immunization coverage in zone 3 of  
25 Dhaka City: the challenge of reaching impoverished households in urban Bangladesh.  
26 *Bull World Health Organ* 1998;**76**:565–73.  
27  
28 22 Luby SP, Halder AK, Saha SK, *et al.* A low-cost approach to measure the burden of  
29 vaccine preventable diseases in urban areas. *Vaccine* 2010;**28**:4903–12.  
30 doi:10.1016/j.vaccine.2010.05.040  
31  
32 23 Uddin MJ, Shamsuzzaman M, Horng L, *et al.* Use of mobile phones for improving  
33 vaccination coverage among children living in rural hard-to-reach areas and urban streets  
34 of Bangladesh. *Vaccine* 2016;**34**:276–83. doi:10.1016/j.vaccine.2015.11.024  
35  
36 24 Sultana NK, Saha SK, Al-Emran HM, *et al.* Impact of introduction of the Haemophilus  
37 influenzae type b conjugate vaccine into childhood immunization on meningitis in  
38 Bangladeshi infants. *J Pediatr* 2013;**163**:S73–8.  
39  
40 25 Vyas S, Kumaranayake L. Constructing socio-economic status indices: how to use  
41 principal components analysis. *Health Policy Plan* 2006;**21**:459–68.  
42 doi:10.1093/heapol/czl029  
43  
44 26 Luby SP, Halder AK. Associations among handwashing indicators, wealth, and  
45 symptoms of childhood respiratory illness in urban Bangladesh. *Trop Med Int Health*  
46 2008;**13**:835–44. doi:10.1111/j.1365-3156.2008.02074.x  
47  
48 27 Sharker MY, Nasser M, Abedin J, *et al.* The risk of misclassifying subjects within  
49 principal component based asset index. *Emerg Themes Epidemiol* 2014;**11**:6.  
50  
51 28 Zou G. A modified poisson regression approach to prospective studies with binary data.  
52 *Am J Epidemiol* 2004;**159**:702–6.  
53  
54 29 Chen W, Shi J, Qian L, *et al.* Comparison of robustness to outliers between robust  
55 poisson models and log-binomial models when estimating relative risks for common  
56  
57  
58  
59  
60

- 1  
2  
3 binary outcomes: a simulation study. *BMC Med Res Methodol* 2014;**14**:82.  
4 doi:10.1186/1471-2288-14-82  
5
- 6 30 Quaiyum MA, Gazi R, Khan AI, *et al*. Programmatic aspects of dropouts in child  
7 vaccination in Bangladesh: findings from a prospective study. *Asia Pac J Public Health*  
8 2011;**23**:141–50. doi:10.1177/1010539509342119  
9
- 10 31 Hussain A, Ali SM, Kvåle G. Determinants of mortality among children in the urban  
11 slums of Dhaka city, Bangladesh. *Trop Med Int Health* 1999;**4**:758–64.  
12
- 13 32 Hidalgo B, Goodman M. Multivariate or Multivariable Regression? *Am J Public Health*  
14 2012;**103**:39–40. doi:10.2105/AJPH.2012.300897  
15
- 16 33 Restrepo-Méndez MC, Barros AJ, Wong KL, *et al*. Inequalities in full immunization  
17 coverage: trends in low- and middle-income countries. *Bull World Health Organ*  
18 2016;**94**:794–805B. doi:http://dx.doi.org/10.2471/BLT.15.162172  
19
- 20 34 Fox J, Weisberg S. *An R Companion to Applied Regression. Chapter 6: Diagnosing*  
21 *Problems in Linear and Generalized Linear Models*. SAGE Publications 2011.  
22 [https://us.sagepub.com/sites/default/files/upm-binaries/38503\\_Chapter6.pdf](https://us.sagepub.com/sites/default/files/upm-binaries/38503_Chapter6.pdf)  
23  
24
- 25 35 Heller LR. Do slums matter? Location and early childhood preventive care choices  
26 among urban residents of Bangladesh. *Soc Sci Med* 2013;**94**.  
27 doi:10.1016/j.socscimed.2013.06.011  
28
- 29 36 Miles M, Ryman TK, Dietz V, *et al*. Validity of vaccination cards and parental recall to  
30 estimate vaccination coverage: a systematic review of the literature. *Vaccine*  
31 2013;**31**:1560–8. doi:10.1016/j.vaccine.2012.10.089  
32
- 33 37 Murray CJ, Shengelia B, Gupta N, *et al*. Validity of reported vaccination coverage in 45  
34 countries. *Lancet* 2003;**362**:1022–7.  
35
- 36 38 Luman ET, Ryman TK, Sablan M. Estimating vaccination coverage: validity of  
37 household-retained vaccination cards and parental recall. *Vaccine* 2009;**27**:2534–9.  
38 doi:10.1016/j.vaccine.2008.10.002  
39
- 40 39 Brown J, Monasch R, Bicego G, *et al*. *An assessment of the quality of national child*  
41 *immunization coverage estimates in population-based surveys*. MEASURE Evaluation,  
42 Carolina Population Center, University of North Carolina at Chapel Hill 2002.  
43  
44
- 45 40 Khan A, Khan A. Validating measures of immunization coverage: lessons from  
46 international experience. USAID 2012.  
47 [http://www.resdev.org/files/policy\\_brief/10/Policy%20brief%2010%20-](http://www.resdev.org/files/policy_brief/10/Policy%20brief%2010%20-%20Validation%20of%20Immunization%20Literature.pdf)  
48 [%20Validation%20of%20Immunization%20Literature.pdf](http://www.resdev.org/files/policy_brief/10/Policy%20brief%2010%20-%20Validation%20of%20Immunization%20Literature.pdf) (accessed 2 Oct 2015).  
49
- 50 41 Fujita M, Sato Y, Nagashima K, *et al*. Impact of geographic accessibility on utilization of  
51 the annual health check-ups by income level in Japan: A multilevel analysis. *PLoS One*  
52 2017;**12**:e0177091. doi:10.1371/journal.pone.0177091  
53
- 54 42 Bokade CM, Madhura AD, Bagul AS, *et al*. Predictors of mortality in children due to  
55 severe and very severe pneumonia. *Niger Med J* 2015;**56**:287.  
56
- 57 43 National Institute of Population Research and Training - NIPORT/Bangladesh, Mitra and  
58 Associates, ICF International. *Bangladesh Demographic and Health Survey 2014*. Dhaka,  
59  
60

Bangladesh: NIPORT, Mitra and Associates, and ICF International 2016.  
<http://dhsprogram.com/pubs/pdf/FR311/FR311.pdf>

- 44 Christakis DA, Mell L, Wright JA, *et al.* The association between greater continuity of care and timely measles-mumps-rubella vaccination. *Am J Public Health* 2000;**90**:962.
- 45 Christakis DA, Mell L, Koepsell TD, *et al.* Association of lower continuity of care with greater risk of emergency department use and hospitalization in children. *Pediatrics* 2001;**107**:524–9.
- 46 Van Walraven C, Oake N, Jennings A, *et al.* The association between continuity of care and outcomes: a systematic and critical review. *J Eval Clin Pract* 2010;**16**:947–56.
- 47 Kuhn R. Identities in motion: Social exchange networks and rural-urban migration in Bangladesh. *Contributions to Indian Sociology* 2003;**37**:311–37.  
doi:10.1177/006996670303700113
- 48 Mills E, Jadad AR, Ross C, *et al.* Systematic review of qualitative studies exploring parental beliefs and attitudes toward childhood vaccination identifies common barriers to vaccination. *J Clin Epidemiol* 11;**58**:1081–8. doi:10.1016/j.jclinepi.2005.09.002
- 49 Rainey JJ, Watkins M, Ryman TK, *et al.* Reasons related to non-vaccination and under-vaccination of children in low and middle income countries: findings from a systematic review of the published literature, 1999–2009. *Vaccine* 2011;**29**:8215–21.
- 50 Favin M, Steinglass R, Fields R, *et al.* Why children are not vaccinated: a review of the grey literature. *International Health* 2012;**4**:229–38. doi:10.1016/j.inhe.2012.07.004
- 51 Sharma V, Singh A, Sharma V. Provider’s and User’s Perspective about Immunization Coverage among Migratory and Non-migratory Population in Slums and Construction Sites of Chandigarh. *J Urban Health* 2015;**92**:304–12. doi:10.1007/s11524-015-9939-2



1  
2  
3  
4  
5  
6  
7  
8  
9  
10  
11  
12  
13  
14  
15  
16  
17  
18  
19  
20  
21  
22  
23  
24  
25  
26  
27  
28  
29  
30  
31  
32  
33  
34  
35  
36  
37  
38  
39  
40  
41  
42  
43  
44  
45  
46  
47

Figures and Tables

**Table 1: Mobility status of study households with children age 0-59 months and association with demographic, socioeconomic, and health characteristics using t- and  $\chi^2$ -tests**

|                                       | Residentially stable,<br>$\geq 24$ months<br>n=5513 |           | Recently relocated,<br>$\leq 12$ months<br>n=4507 |           | p-value |
|---------------------------------------|-----------------------------------------------------|-----------|---------------------------------------------------|-----------|---------|
| <u>Demographics</u>                   | <u>mean</u>                                         | <u>SE</u> | <u>mean</u>                                       | <u>SE</u> |         |
| Number of household members           | 5.40                                                | 0.09      | 4.60                                              | 0.10      | <0.001  |
| Number of children <5yrs in household | 1.28                                                | 0.01      | 1.25                                              | 0.01      | 0.194   |
| Age of index child in months          | 30.0                                                | 0.23      | 28.7                                              | 0.25      | <0.001  |
|                                       | <u>n</u>                                            | <u>%</u>  | <u>n</u>                                          | <u>%</u>  |         |
| Sex of index child: Male              | 2478                                                | 45        | 2048                                              | 45        | 0.622   |
| <u>Socioeconomics</u>                 |                                                     |           |                                                   |           |         |
| Mother's education                    |                                                     |           |                                                   |           | <0.001  |
| No education                          | 1133                                                | 21        | 1162                                              | 26        |         |
| Some schooling                        | 1142                                                | 21        | 1176                                              | 26        |         |
| Finished secondary                    | 1849                                                | 34        | 1483                                              | 33        |         |
| > Secondary                           | 1389                                                | 25        | 686                                               | 15        |         |
| Father's education                    |                                                     |           |                                                   |           | <0.001  |
| No education                          | 1261                                                | 23        | 1139                                              | 25        |         |
| Some schooling                        | 913                                                 | 17        | 911                                               | 20        |         |
| Finished secondary                    | 1525                                                | 28        | 1372                                              | 30        |         |
| > Secondary                           | 1814                                                | 33        | 1085                                              | 24        |         |
| Occupation of household head          |                                                     |           |                                                   |           | <0.001  |
| Unemployed or other                   | 482                                                 | 9         | 232                                               | 5         |         |
| Daily labor                           | 916                                                 | 17        | 1218                                              | 27        |         |
| Shopkeeper or merchant                | 1787                                                | 32        | 1058                                              | 23        |         |
| Salaried service                      | 2328                                                | 42        | 1999                                              | 44        |         |
| Monthly household income <sup>a</sup> |                                                     |           |                                                   |           | <0.001  |
| $\leq 5,000$ taka (US \$73)           | 971                                                 | 18        | 1080                                              | 24        |         |

|                                                                                        |                  |    |      |    |                  |
|----------------------------------------------------------------------------------------|------------------|----|------|----|------------------|
| 5,001 – 10,000 taka                                                                    | 1634             | 30 | 1925 | 43 |                  |
| > 10,000 taka (US \$145)                                                               | 2900             | 53 | 1498 | 33 |                  |
| Household wealth index <sup>b</sup>                                                    |                  |    |      |    | <b>&lt;0.001</b> |
| Lowest                                                                                 | 1092             | 20 | 1110 | 25 |                  |
| Second                                                                                 | 922              | 17 | 1021 | 23 |                  |
| Third                                                                                  | 966 <sup>f</sup> | 18 | 911  | 20 |                  |
| Fourth                                                                                 | 1455             | 26 | 1155 | 26 |                  |
| Highest                                                                                | 1078             | 20 | 310  | 7  |                  |
| <u>Health services knowledge</u>                                                       |                  |    |      |    |                  |
| Knowledge of local hospital                                                            | 4709             | 85 | 3428 | 76 | <b>&lt;0.001</b> |
| <u>Health outcomes</u>                                                                 |                  |    |      |    |                  |
| Severe acute respiratory illness suffered by index child within 12 months <sup>e</sup> | 763              | 14 | 695  | 15 | <b>0.026</b>     |
| Meningitis/encephalitis suffered by index child within 12 months <sup>d</sup>          | 185              | 3  | 164  | 4  | 0.443            |

<sup>a</sup>12 respondents (8 residentially stable and 4 recently relocated) did not know or did not disclose household income.

<sup>b</sup>Polychoric Principal Components Analysis was used to create a household wealth index including structural housing characteristics, cooking fuel, drinking water, and sanitation.

<sup>c</sup>One residentially stable respondent did not know if child recently had a severe acute respiratory illness.

<sup>d</sup>Three respondents did not know if child recently had a serious illness with mental status changes (2 residentially stable and 1 recently relocated).

1  
2  
3  
4  
5  
6  
7  
8  
9  
10  
11  
12  
13  
14  
15  
16  
17  
18  
19  
20  
21  
22  
23  
24  
25  
26  
27  
28  
29  
30  
31  
32  
33  
34  
35  
36  
37  
38  
39  
40  
41  
42  
43  
44  
45  
46  
47

**Table 2: Using vaccination card plus maternal recall, vaccination coverage among children age 9-59 months and association with mobility status using univariate and multivariable models with modified Poisson regression**

|                                                  | Partial vaccination<br>n=1465 (17%) |           | Full vaccination <sup>a</sup><br>n=7043 (83%) |           | PR <sup>b</sup> | 95% CI             | p-value          |
|--------------------------------------------------|-------------------------------------|-----------|-----------------------------------------------|-----------|-----------------|--------------------|------------------|
| <u>Univariate analyses</u>                       |                                     |           |                                               |           |                 |                    |                  |
| Mobility status                                  | <u>n</u>                            | <u>%</u>  | <u>n</u>                                      | <u>%</u>  |                 |                    |                  |
| Residentially stable ≥24 months                  | 706                                 | 15        | 4007                                          | 85        | Reference       |                    |                  |
| Recently relocated ≤12 months                    | 759                                 | 20        | 3036                                          | 80        | <b>0.94</b>     | <b>0.91-0.97</b>   | <b>&lt;0.001</b> |
| Demographics                                     | <u>mean</u>                         | <u>SE</u> | <u>mean</u>                                   | <u>SE</u> |                 |                    |                  |
| Number of children <5yrs in household            | 1.31                                | 0.02      | 1.25                                          | 0.01      | <b>0.96</b>     | <b>0.93-0.98</b>   | <b>0.002</b>     |
| Age of index child in months                     | 32.0                                | 0.44      | 34.2                                          | 0.16      | <b>1.002</b>    | <b>1.001-1.003</b> | <b>&lt;0.001</b> |
| Socioeconomics                                   |                                     |           |                                               |           |                 |                    |                  |
| Mother's education                               | <u>n</u>                            | <u>%</u>  | <u>n</u>                                      | <u>%</u>  |                 |                    |                  |
| No education                                     | 629                                 | 31        | 1377                                          | 69        | Reference       |                    |                  |
| Some schooling                                   | 401                                 | 21        | 1540                                          | 79        | <b>1.16</b>     | <b>1.10-1.21</b>   | <b>&lt;0.001</b> |
| Finished secondary                               | 323                                 | 11        | 2513                                          | 89        | <b>1.29</b>     | <b>1.23-1.36</b>   | <b>&lt;0.001</b> |
| > Higher secondary                               | 112                                 | 6         | 1613                                          | 94        | <b>1.36</b>     | <b>1.30-1.43</b>   | <b>&lt;0.001</b> |
| Occupation of household head                     |                                     |           |                                               |           |                 |                    |                  |
| Unemployed or other                              | 106                                 | 17        | 505                                           | 83        | Reference       |                    |                  |
| Daily labor                                      | 524                                 | 29        | 1283                                          | 71        | <b>0.86</b>     | <b>0.82-0.90</b>   | <b>&lt;0.001</b> |
| Shopkeeper or merchant                           | 348                                 | 14        | 2084                                          | 86        | 1.04            | 0.99-1.08          | 0.112            |
| Salaried service                                 | 487                                 | 13        | 3171                                          | 87        | <b>1.05</b>     | <b>1.01-1.09</b>   | <b>0.029</b>     |
| Household wealth status (PCA <sup>c</sup> )      |                                     |           |                                               |           |                 |                    |                  |
| Lowest                                           | 596                                 | 32        | 1290                                          | 68        | Reference       |                    |                  |
| Second                                           | 334                                 | 20        | 1298                                          | 80        | <b>1.16</b>     | <b>1.09-1.24</b>   | <b>&lt;0.001</b> |
| Third                                            | 242                                 | 15        | 1348                                          | 85        | <b>1.24</b>     | <b>1.16-1.32</b>   | <b>&lt;0.001</b> |
| Fourth                                           | 193                                 | 9         | 2043                                          | 91        | <b>1.34</b>     | <b>1.25-1.42</b>   | <b>&lt;0.001</b> |
| Highest                                          | 100                                 | 9         | 1064                                          | 91        | <b>1.34</b>     | <b>1.25-1.43</b>   | <b>&lt;0.001</b> |
| Health services knowledge                        |                                     |           |                                               |           |                 |                    |                  |
| Does <i>not</i> have knowledge of local hospital | 354                                 | 23        | 1218                                          | 77        | Reference       |                    |                  |
| Has knowledge of local hospital                  | 1111                                | 16        | 5825                                          | 84        | <b>1.08</b>     | <b>1.05-1.12</b>   | <b>&lt;0.001</b> |

| <u>Multivariable analyses with different models</u>                         |             |                  |                  |
|-----------------------------------------------------------------------------|-------------|------------------|------------------|
| Mobility, adjusting for demographics (# of children and age of index child) | <b>0.94</b> | <b>0.92-0.97</b> | <b>&lt;0.001</b> |
| Mobility, adjusting for socioeconomics (education, occupation, and wealth)  | <b>0.97</b> | <b>0.95-0.99</b> | <b>0.009</b>     |
| Mobility, adjusting for demographics and socioeconomics                     | <b>0.97</b> | <b>0.95-0.99</b> | <b>0.016</b>     |

<sup>a</sup>Full vaccination coverage per Expanded Programme on Immunization includes 1 dose of BCG, 3 doses of polio, 3 doses of DPT, and 1 dose of measles vaccines.

<sup>b</sup>PR, Prevalence Ratio.

<sup>c</sup>Polychoric Principal Components Analysis was used to create a household wealth index including structural housing characteristics, cooking fuel, drinking water, and sanitation.

For peer review only

1  
2  
3  
4  
5  
6  
7  
8  
9  
10  
11  
12  
13  
14  
15  
16  
17  
18  
19  
20  
21  
22  
23  
24  
25  
26  
27  
28  
29  
30  
31  
32  
33  
34  
35  
36  
37  
38  
39  
40  
41  
42  
43  
44  
45  
46  
47

**Table 3: Using vaccination card only, vaccination coverage among children age 9-59 months who have vaccination cards and association with mobility status using univariate and multivariable models with modified Poisson regression**

|                                                  | Partial vaccination<br>n=564 (15%) |           | Full vaccination <sup>a</sup><br>n=3085 (85%) |           | PR <sup>b</sup> | 95% CI             | p-value          |
|--------------------------------------------------|------------------------------------|-----------|-----------------------------------------------|-----------|-----------------|--------------------|------------------|
| <u>Univariate analyses</u>                       |                                    |           |                                               |           |                 |                    |                  |
| Mobility status                                  | <u>n</u>                           | <u>%</u>  | <u>n</u>                                      | <u>%</u>  |                 |                    |                  |
| Residentially stable ≥24 months                  | 329                                | 14        | 1948                                          | 86        | Reference       |                    |                  |
| Recently relocated ≤12 months                    | 235                                | 17        | 1137                                          | 83        | 0.97            | 0.93-1.00          | 0.083            |
| Demographics                                     | <u>mean</u>                        | <u>SE</u> | <u>mean</u>                                   | <u>SE</u> |                 |                    |                  |
| Number of children <5yrs in household            | 1.26                               | 0.02      | 1.24                                          | 0.01      | 0.99            | 0.96-1.02          | 0.486            |
| Age of index child in months                     | 27.1                               | 0.64      | 29.6                                          | 0.25      | <b>1.002</b>    | <b>1.001-1.003</b> | <b>0.001</b>     |
| Socioeconomics                                   |                                    |           |                                               |           |                 |                    |                  |
| Mother's education                               | <u>n</u>                           | <u>%</u>  | <u>n</u>                                      | <u>%</u>  |                 |                    |                  |
| No education                                     | 165                                | 28        | 430                                           | 72        | Reference       |                    |                  |
| Some schooling                                   | 123                                | 16        | 654                                           | 84        | <b>1.16</b>     | <b>1.09-1.24</b>   | <b>&lt;0.001</b> |
| Finished secondary                               | 186                                | 14        | 1158                                          | 86        | <b>1.19</b>     | <b>1.11-1.28</b>   | <b>&lt;0.001</b> |
| > Higher secondary                               | 90                                 | 10        | 843                                           | 90        | <b>1.25</b>     | <b>1.17-1.33</b>   | <b>&lt;0.001</b> |
| Occupation of household head                     |                                    |           |                                               |           |                 |                    |                  |
| Unemployed or other                              | 35                                 | 13        | 238                                           | 87        | Reference       |                    |                  |
| Daily labor                                      | 148                                | 26        | 413                                           | 74        | <b>0.84</b>     | <b>0.78-0.91</b>   | <b>&lt;0.001</b> |
| Shopkeeper or merchant                           | 143                                | 13        | 921                                           | 87        | 0.99            | 0.94-1.04          | 0.778            |
| Salaried service                                 | 238                                | 14        | 1513                                          | 86        | 0.99            | 0.95-1.04          | 0.704            |
| Household wealth status (PCA <sup>c</sup> )      |                                    |           |                                               |           |                 |                    |                  |
| Lowest                                           | 148                                | 27        | 401                                           | 73        | Reference       |                    |                  |
| Second                                           | 131                                | 21        | 503                                           | 79        | <b>1.09</b>     | <b>1.02-1.16</b>   | <b>0.009</b>     |
| Third                                            | 97                                 | 15        | 572                                           | 86        | <b>1.17</b>     | <b>1.09-1.26</b>   | <b>&lt;0.001</b> |
| Fourth                                           | 110                                | 10        | 1005                                          | 90        | <b>1.23</b>     | <b>1.15-1.32</b>   | <b>&lt;0.001</b> |
| Highest                                          | 78                                 | 11        | 604                                           | 89        | <b>1.21</b>     | <b>1.13-1.30</b>   | <b>&lt;0.001</b> |
| Health services knowledge                        |                                    |           |                                               |           |                 |                    |                  |
| Does <i>not</i> have knowledge of local hospital | 101                                | 19        | 434                                           | 81        | Reference       |                    |                  |
| Has knowledge of local hospital                  | 463                                | 15        | 2651                                          | 85        | <b>1.05</b>     | <b>1.01-1.09</b>   | <b>0.025</b>     |

1  
2  
3 Multivariable analyses with different models

|                                                                               |      |           |       |
|-------------------------------------------------------------------------------|------|-----------|-------|
| 4 Mobility, adjusting for demographics (# of children and age of index child) | 0.97 | 0.94-1.01 | 0.126 |
| 5 Mobility, adjusting for socioeconomics (education, occupation, and wealth)  | 0.98 | 0.95-1.02 | 0.308 |
| 6 Mobility, adjusting for demographics and socioeconomics                     | 0.98 | 0.95-1.02 | 0.396 |

7  
8 <sup>a</sup>Full vaccination coverage per Expanded Programme on Immunization includes 1 dose of BCG, 3 doses of polio, 3 doses of DPT, and 1 dose of measles vaccines.

9 <sup>b</sup>PR, Prevalence Ratio.

10 <sup>c</sup>Polychoric Principal Components Analysis was used to create a household wealth index including structural housing characteristics, cooking fuel, drinking water, and sanitation.

11  
12  
13  
14  
15  
16  
17  
18  
19  
20  
21  
22  
23  
24  
25  
26  
27  
28  
29  
30  
31  
32  
33  
34  
35  
36  
37  
38  
39  
40  
41  
42  
43  
44  
45  
46  
47

For peer review only

1  
2  
3  
4  
5  
6  
7  
8  
9  
10  
11  
12  
13  
14  
15  
16  
17  
18  
19  
20  
21  
22  
23  
24  
25  
26  
27  
28  
29  
30  
31  
32  
33  
34  
35  
36  
37  
38  
39  
40  
41  
42  
43  
44  
45  
46  
47

**Table 4: Qualified provider visits for severe acute respiratory illness within prior year among children < 5 years old and association with mobility using univariate and multivariable models with modified Poisson regression**

|                                                  | No qualified provider for severe ARI <sup>a</sup><br>n=358 (25%) |           | Qualified provider for severe ARI <sup>a</sup><br>n=1100 (75%) |           | PR <sup>b</sup> | 95% CI             | p-value          |
|--------------------------------------------------|------------------------------------------------------------------|-----------|----------------------------------------------------------------|-----------|-----------------|--------------------|------------------|
| <u>Univariate analyses</u>                       |                                                                  |           |                                                                |           |                 |                    |                  |
| Mobility status                                  | <u>n</u>                                                         | <u>%</u>  | <u>n</u>                                                       | <u>%</u>  |                 |                    |                  |
| Residentially stable ≥24 months                  | 141                                                              | 18        | 622                                                            | 82        | Reference       |                    |                  |
| Recently relocated ≤12 months                    | 217                                                              | 31        | 478                                                            | 69        | <b>0.84</b>     | <b>0.79-0.90</b>   | <b>&lt;0.001</b> |
| Demographics                                     | <u>mean</u>                                                      | <u>SE</u> | <u>mean</u>                                                    | <u>SE</u> |                 |                    |                  |
| Number of children <5yrs in household            | 1.23                                                             | 0.03      | 1.25                                                           | 0.02      | 1.02            | 0.97-1.08          | 0.437            |
| Age of index child in months                     | 29.1                                                             | 0.83      | 23.7                                                           | 0.44      | <b>0.994</b>    | <b>0.992-0.996</b> | <b>&lt;0.001</b> |
| Socioeconomics                                   |                                                                  |           |                                                                |           |                 |                    |                  |
| Mother's education                               | <u>n</u>                                                         | <u>%</u>  | <u>n</u>                                                       | <u>%</u>  |                 |                    |                  |
| No education                                     | 134                                                              | 38        | 220                                                            | 62        | Reference       |                    |                  |
| Some schooling                                   | 127                                                              | 32        | 267                                                            | 68        | 1.09            | 0.96-1.23          | 0.170            |
| Finished secondary                               | 79                                                               | 16        | 425                                                            | 84        | <b>1.36</b>     | <b>1.20-1.54</b>   | <b>&lt;0.001</b> |
| > Higher secondary                               | 18                                                               | 9         | 188                                                            | 91        | <b>1.47</b>     | <b>1.30-1.66</b>   | <b>&lt;0.001</b> |
| Occupation of household head                     |                                                                  |           |                                                                |           |                 |                    |                  |
| Unemployed or other                              | 24                                                               | 23        | 82                                                             | 77        | Reference       |                    |                  |
| Daily labor                                      | 139                                                              | 36        | 244                                                            | 64        | <b>0.82</b>     | <b>0.72-0.94</b>   | <b>0.005</b>     |
| Shopkeeper or merchant                           | 89                                                               | 22        | 320                                                            | 78        | 1.01            | 0.90-1.14          | 0.848            |
| Salaried service                                 | 106                                                              | 19        | 454                                                            | 81        | 1.05            | 0.93-1.18          | 0.435            |
| Household wealth status (PCA <sup>c</sup> )      |                                                                  |           |                                                                |           |                 |                    |                  |
| Lowest                                           | 154                                                              | 40        | 228                                                            | 60        | Reference       |                    |                  |
| Second                                           | 93                                                               | 30        | 220                                                            | 70        | <b>1.18</b>     | <b>1.02-1.37</b>   | <b>0.031</b>     |
| Third                                            | 59                                                               | 21        | 220                                                            | 79        | <b>1.32</b>     | <b>1.16-1.51</b>   | <b>&lt;0.001</b> |
| Fourth                                           | 37                                                               | 12        | 277                                                            | 88        | <b>1.48</b>     | <b>1.31-1.67</b>   | <b>&lt;0.001</b> |
| Highest                                          | 15                                                               | 9         | 155                                                            | 91        | <b>1.53</b>     | <b>1.35-1.73</b>   | <b>&lt;0.001</b> |
| Health services knowledge                        |                                                                  |           |                                                                |           |                 |                    |                  |
| Does <i>not</i> have knowledge of local hospital | 114                                                              | 49        | 118                                                            | 51        | Reference       |                    |                  |

|                                                                             |     |    |     |    |             |                  |                  |
|-----------------------------------------------------------------------------|-----|----|-----|----|-------------|------------------|------------------|
| Has knowledge of local hospital                                             | 244 | 20 | 982 | 80 | <b>1.57</b> | <b>1.34-1.85</b> | <b>&lt;0.001</b> |
| <u>Multivariable analyses with different models</u>                         |     |    |     |    |             |                  |                  |
| Mobility, adjusting for demographics (# of children and age of index child) |     |    |     |    | <b>0.84</b> | <b>0.79-0.89</b> | <b>&lt;0.001</b> |
| Mobility, adjusting for socioeconomic (education, occupation, and wealth)   |     |    |     |    | <b>0.89</b> | <b>0.84-0.94</b> | <b>&lt;0.001</b> |
| Mobility, adjusting for demographics and socioeconomic                      |     |    |     |    | <b>0.88</b> | <b>0.84-0.93</b> | <b>&lt;0.001</b> |

<sup>a</sup>ARI, Acute Respiratory Illness.

<sup>b</sup>PR, Prevalence Ratio.

<sup>c</sup>Polychoric Principal Components Analysis was used to create a household wealth index including structural housing characteristics, cooking fuel, drinking water, and sanitation.

For peer review only



1  
2  
3  
4  
5  
6  
7  
8  
9  
10  
11  
12  
13  
14  
15  
16  
17  
18  
19  
20  
21  
22  
23  
24  
25  
26  
27  
28  
29  
30  
31  
32  
33  
34  
35  
36  
37  
38  
39  
40  
41  
42  
43  
44  
45  
46  
47

**Figure 1: Children sampled by mobility status for healthcare utilization and vaccination coverage analysis**

Note: \*ARI = Acute Respiratory Illness

For peer review only

**Supplemental Figure 1: Cook's distance calculations to examine influential observations**

Cook's distance plots of multivariable models examining mobility, demographics, and socioeconomic factors for: vaccination using card plus maternal recall among children 9-59 months (A), vaccination using card only among children 9-59 months (B), qualified provider visits for respiratory infections among children <5 years old (C), vaccination using card plus maternal recall among children 9-23 months (D), and vaccination using card only among children 9-23 months (E). The red lines indicate threshold value of  $4/n$  where  $n$ =number of observations.

For peer review only

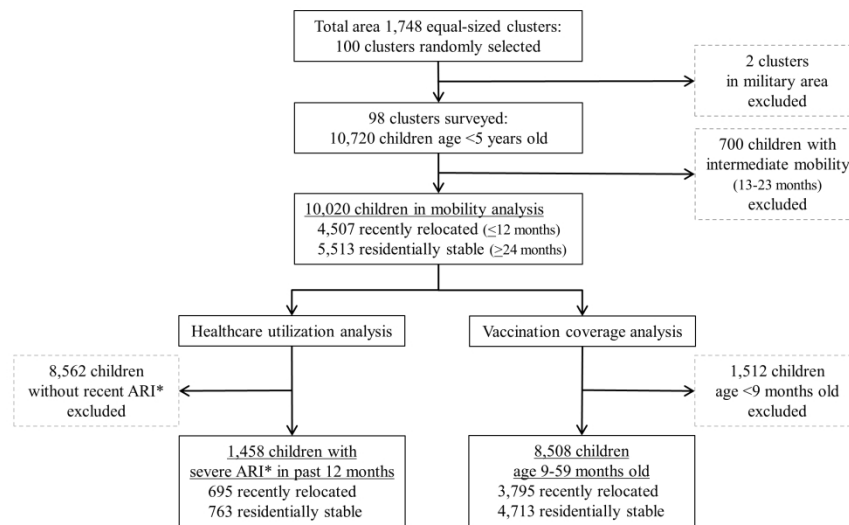

**Figure 1: Children sampled by mobility status for healthcare utilization and vaccination coverage analysis**  
 Note: \*ARI = Acute Respiratory Illness

Figure 1: Children sampled by mobility status for healthcare utilization and vaccination coverage analysis  
 Note: \*ARI = Acute Respiratory Illness

254x190mm (300 x 300 DPI)

**Effect of household relocation on child vaccination and health service utilization in Dhaka, Bangladesh:  
a cross-sectional community survey**

**SUPPLEMENTAL FIGURES AND TABLES**

**Supplemental Table 1: Household wealth principal components analysis coding and variable loading**

| <b>Indicator</b>    | <b>Coding</b>                                                                                                                                   | <b>Loading</b> |
|---------------------|-------------------------------------------------------------------------------------------------------------------------------------------------|----------------|
| Number of rooms     | Continuous                                                                                                                                      | 0.337          |
| Housing arrangement | 1 = Free<br>2 = Rental<br>3 = Owned                                                                                                             | 0.235          |
| Roof                | 1 = Natural roof (bamboo/thatch)<br>2 = Rudimentary roof (tin)<br>3 = Finished roof (cement/concrete/tiled)<br>4 = Other                        | 0.392          |
| Walls               | 1 = Natural walls (jute/bamboo/mud)<br>2 = Rudimentary walls (wood)<br>3 = Finished walls (tin/brick/cement)<br>4 = Other                       | 0.316          |
| Floor               | 1 = Natural floor (earth/bamboo)<br>2 = Rudimentary floor (wood)<br>3 = Finished floor (cement/concrete)<br>4 = Other                           | 0.377          |
| Cooking fuel        | 1 = Natural (wood/grass/dung)<br>2 = Coal/charcoal<br>3 = Kerosene<br>4 = Electricity<br>5 = Gas (liquid/biogas)<br>6 = Other                   | 0.350          |
| Drinking water      | 1 = Unimproved (unprotected/surface/bottled)<br>2 = Improved but not piped<br>3 = Improved and piped into yard or private dwelling<br>4 = Other | 0.170          |
| Sanitation          | 1 = Unimproved (open defecation/hanging/open or broken pit)<br>2 = Improved but not piped                                                       | 0.374          |

1  
2  
3  
4  
5  
6  
7  
8  
9  
10  
11  
12  
13  
14  
15  
16  
17  
18  
19  
20  
21  
22  
23  
24  
25  
26  
27  
28  
29  
30  
31  
32  
33  
34  
35  
36  
37  
38  
39  
40  
41  
42  
43  
44  
45  
46  
47

|                        |                                           |       |
|------------------------|-------------------------------------------|-------|
|                        | 3 = Improved and piped sewer<br>4 = Other |       |
| Mobile phone ownership | 0 = No<br>1 = Yes                         | 0.380 |

Note: 51% of overall variance was explained by the first component.

For peer review only

**Supplemental Table 2: Using vaccination card plus maternal recall, vaccination coverage among children age 9-23 months and association with mobility status using univariate and multivariable models with modified Poisson regression**

|                                                  | Partial vaccination<br>n=518 (21%) |           | Full vaccination <sup>a</sup><br>n=1906 (79%) |           | PR <sup>b</sup> | 95% CI           | p-value          |
|--------------------------------------------------|------------------------------------|-----------|-----------------------------------------------|-----------|-----------------|------------------|------------------|
| <u>Univariate analyses</u>                       |                                    |           |                                               |           |                 |                  |                  |
| Mobility status                                  | <u>n</u>                           | <u>%</u>  | <u>n</u>                                      | <u>%</u>  |                 |                  |                  |
| Residentially stable $\geq 24$ months            | 243                                | 19        | 1053                                          | 81        | Reference       |                  |                  |
| Recently relocated $\leq 12$ months              | 275                                | 24        | 853                                           | 76        | <b>0.93</b>     | <b>0.88-0.98</b> | <b>0.009</b>     |
| Demographics                                     | <u>mean</u>                        | <u>SE</u> | <u>mean</u>                                   | <u>SE</u> |                 |                  |                  |
| Number of children <5yrs in household            | 1.31                               | 0.03      | 1.24                                          | 0.01      | <b>0.94</b>     | <b>0.89-0.99</b> | <b>0.035</b>     |
| Age of index child in months                     | 14.73                              | 0.20      | 16.35                                         | 0.11      | <b>1.02</b>     | <b>1.02-1.03</b> | <b>&lt;0.001</b> |
| Socioeconomics                                   |                                    |           |                                               |           |                 |                  |                  |
| Mother's education                               | <u>n</u>                           | <u>%</u>  | <u>n</u>                                      | <u>%</u>  |                 |                  |                  |
| No education                                     | 207                                | 41        | 303                                           | 59        | Reference       |                  |                  |
| Some schooling                                   | 121                                | 22        | 433                                           | 78        | <b>1.32</b>     | <b>1.18-1.47</b> | <b>&lt;0.001</b> |
| Finished secondary                               | 141                                | 16        | 719                                           | 84        | <b>1.41</b>     | <b>1.27-1.56</b> | <b>&lt;0.001</b> |
| > Higher secondary                               | 49                                 | 10        | 451                                           | 90        | <b>1.52</b>     | <b>1.36-1.69</b> | <b>&lt;0.001</b> |
| Occupation of household head                     |                                    |           |                                               |           |                 |                  |                  |
| Unemployed or other                              | 26                                 | 15        | 147                                           | 85        | Reference       |                  |                  |
| Daily labor                                      | 195                                | 38        | 318                                           | 62        | <b>0.73</b>     | <b>0.66-0.81</b> | <b>&lt;0.001</b> |
| Shopkeeper or merchant                           | 124                                | 19        | 538                                           | 81        | 0.96            | 0.88-1.04        | 0.287            |
| Salaried service                                 | 173                                | 16        | 903                                           | 84        | 0.99            | 0.91-1.07        | 0.752            |
| Household wealth status (PCA <sup>c</sup> )      |                                    |           |                                               |           |                 |                  |                  |
| Lowest                                           | 212                                | 40        | 321                                           | 60        | Reference       |                  |                  |
| Second                                           | 114                                | 25        | 348                                           | 75        | <b>1.25</b>     | <b>1.11-1.40</b> | <b>&lt;0.001</b> |
| Third                                            | 84                                 | 18        | 382                                           | 82        | <b>1.36</b>     | <b>1.20-1.54</b> | <b>&lt;0.001</b> |
| Fourth                                           | 59                                 | 10        | 560                                           | 90        | <b>1.50</b>     | <b>1.34-1.69</b> | <b>&lt;0.001</b> |
| Highest                                          | 49                                 | 14        | 295                                           | 86        | <b>1.42</b>     | <b>1.26-1.61</b> | <b>&lt;0.001</b> |
| Health services knowledge                        |                                    |           |                                               |           |                 |                  |                  |
| Does <i>not</i> have knowledge of local hospital | 127                                | 28        | 324                                           | 72        | Reference       |                  |                  |
| Has knowledge of local hospital                  | 391                                | 20        | 1582                                          | 80        | <b>1.12</b>     | <b>1.05-1.19</b> | <b>&lt;0.001</b> |

1  
2  
3  
4  
5  
6  
7  
8  
9  
10  
11  
12  
13  
14  
15  
16  
17  
18  
19  
20  
21  
22  
23  
24  
25  
26  
27  
28  
29  
30  
31  
32  
33  
34  
35  
36  
37  
38  
39  
40  
41  
42  
43  
44  
45  
46  
47

| <u>Multivariable analyses with different models</u>                         |             |                  |              |
|-----------------------------------------------------------------------------|-------------|------------------|--------------|
| Mobility, adjusting for demographics (# of children and age of index child) | <b>0.93</b> | <b>0.88-0.98</b> | <b>0.007</b> |
| Mobility, adjusting for socioeconomics (education, occupation, and wealth)  | 0.96        | 0.91-1.01        | 0.136        |
| Mobility, adjusting for demographics and socioeconomics                     | 0.96        | 0.92-1.01        | 0.138        |

<sup>a</sup>Full vaccination coverage per Expanded Programme on Immunization includes 1 dose of BCG, 3 doses of polio, 3 doses of DPT, and 1 dose of measles vaccines.

<sup>b</sup>PR, Prevalence Ratio.

<sup>c</sup>Polychoric Principal Components Analysis was used to create a household wealth index including structural housing characteristics, cooking fuel, drinking water, and sanitation.

For peer review only

**Supplemental Table 3: Using vaccination card only, vaccination coverage among children age 9-23 months who have vaccination cards and association with mobility status using univariate and multivariable models with modified Poisson regression**

|                                                  | Partial vaccination<br>n=281 (19%) |           | Full vaccination <sup>a</sup><br>n=1222 (81%) |           | PR <sup>b</sup> | 95% CI           | p-value          |
|--------------------------------------------------|------------------------------------|-----------|-----------------------------------------------|-----------|-----------------|------------------|------------------|
| <u>Univariate analyses</u>                       |                                    |           |                                               |           |                 |                  |                  |
| Mobility status                                  | <u>n</u>                           | <u>%</u>  | <u>n</u>                                      | <u>%</u>  |                 |                  |                  |
| Residentially stable $\geq 24$ months            | 156                                | 18        | 715                                           | 82        | Reference       |                  |                  |
| Recently relocated $\leq 12$ months              | 125                                | 20        | 507                                           | 80        | 0.97            | 0.92-1.04        | 0.469            |
| Demographics                                     | <u>mean</u>                        | <u>SE</u> | <u>mean</u>                                   | <u>SE</u> |                 |                  |                  |
| Number of children <5yrs in household            | 1.23                               | 0.03      | 1.21                                          | 0.01      | 0.98            | 0.93-1.04        | 0.543            |
| Age of index child in months                     | 14.4                               | 0.27      | 15.9                                          | 0.15      | <b>1.02</b>     | <b>1.01-1.03</b> | <b>&lt;0.001</b> |
| Socioeconomics                                   |                                    |           |                                               |           |                 |                  |                  |
| Mother's education                               | <u>n</u>                           | <u>%</u>  | <u>n</u>                                      | <u>%</u>  |                 |                  |                  |
| No education                                     | 94                                 | 35        | 176                                           | 65        | Reference       |                  |                  |
| Some schooling                                   | 57                                 | 17        | 286                                           | 83        | <b>1.28</b>     | <b>1.15-1.42</b> | <b>&lt;0.001</b> |
| Finished secondary                               | 93                                 | 17        | 461                                           | 83        | <b>1.28</b>     | <b>1.14-1.43</b> | <b>&lt;0.001</b> |
| > Higher secondary                               | 37                                 | 11        | 299                                           | 89        | <b>1.37</b>     | <b>1.22-1.52</b> | <b>&lt;0.001</b> |
| Occupation of household head                     |                                    |           |                                               |           |                 |                  |                  |
| Unemployed or other                              | 14                                 | 12        | 100                                           | 88        | Reference       |                  |                  |
| Daily labor                                      | 89                                 | 33        | 184                                           | 67        | <b>0.77</b>     | <b>0.68-0.87</b> | <b>&lt;0.001</b> |
| Shopkeeper or merchant                           | 66                                 | 16        | 352                                           | 84        | 0.96            | 0.88-1.04        | 0.327            |
| Salaried service                                 | 112                                | 16        | 586                                           | 84        | 0.96            | 0.88-1.04        | 0.297            |
| Household wealth status (PCA <sup>c</sup> )      |                                    |           |                                               |           |                 |                  |                  |
| Lowest                                           | 84                                 | 32        | 179                                           | 68        | Reference       |                  |                  |
| Second                                           | 67                                 | 24        | 211                                           | 76        | 1.12            | 0.99-1.25        | 0.062            |
| Third                                            | 52                                 | 17        | 248                                           | 83        | <b>1.21</b>     | <b>1.08-1.37</b> | <b>0.002</b>     |
| Fourth                                           | 42                                 | 10        | 381                                           | 90        | <b>1.32</b>     | <b>1.18-1.48</b> | <b>&lt;0.001</b> |
| Highest                                          | 36                                 | 15        | 203                                           | 85        | <b>1.25</b>     | <b>1.10-1.41</b> | <b>&lt;0.001</b> |
| Health services knowledge                        |                                    |           |                                               |           |                 |                  |                  |
| Does <i>not</i> have knowledge of local hospital | 55                                 | 22        | 194                                           | 78        | Reference       |                  |                  |
| Has knowledge of local hospital                  | 226                                | 18        | 1028                                          | 82        | 1.05            | 0.98-1.13        | 0.141            |



1  
2  
3  
4  
5  
6  
7  
8  
9  
10  
11  
12  
13  
14  
15  
16  
17  
18  
19  
20  
21  
22  
23  
24  
25  
26  
27  
28  
29  
30  
31  
32  
33  
34  
35  
36  
37  
38  
39  
40  
41  
42  
43  
44  
45  
46  
47

| <u>Multivariable analyses with different models</u>                         |      |           |       |
|-----------------------------------------------------------------------------|------|-----------|-------|
| Mobility, adjusting for demographics (# of children and age of index child) | 0.98 | 0.93-1.04 | 0.582 |
| Mobility, adjusting for socioeconomics (education, occupation, and wealth)  | 1.00 | 0.94-1.06 | 0.948 |
| Mobility, adjusting for demographics and socioeconomics                     | 1.00 | 0.95-1.07 | 0.888 |

<sup>a</sup>Full vaccination coverage per Expanded Programme on Immunization includes 1 dose of BCG, 3 doses of polio, 3 doses of DPT, and 1 dose of measles vaccines.

<sup>b</sup>PR, Prevalence Ratio.

<sup>c</sup>Polychoric Principal Components Analysis was used to create a household wealth index including structural housing characteristics, cooking fuel, drinking water, and sanitation.

For peer review only



**Supplemental Figure 1: Cook's distance calculations to examine influential observations**  
 Cook's distance plots of multivariable models examining mobility, demographics, and socioeconomics for: vaccination using card plus maternal recall among children 9-59 months (A), vaccination using card only among children 9-59 months (B), qualified provider visits for respiratory infections among children <5 years old (C), vaccination using card plus maternal recall among children 9-23 months (D), and vaccination using card only among children 9-23 months (E). The red lines indicate threshold value of  $4/n$  where  $n$ =number of observations.

190x254mm (300 x 300 DPI)

## Effect of household relocation on child vaccination and health service utilization in Dhaka, Bangladesh: a cross-sectional community survey

### STROBE 2007 (v4) Statement—Checklist of items that should be included in reports of *cross-sectional studies*

| Section/Topic                | Item # | Recommendation                                                                                                                                                                       | Reported on page # |
|------------------------------|--------|--------------------------------------------------------------------------------------------------------------------------------------------------------------------------------------|--------------------|
| Title and abstract           | 1      | (a) Indicate the study's design with a commonly used term in the title or the abstract                                                                                               | 1                  |
|                              |        | (b) Provide in the abstract an informative and balanced summary of what was done and what was found                                                                                  | 2                  |
| <b>Introduction</b>          |        |                                                                                                                                                                                      |                    |
| Background/rationale         | 2      | Explain the scientific background and rationale for the investigation being reported                                                                                                 | 4                  |
| Objectives                   | 3      | State specific objectives, including any prespecified hypotheses                                                                                                                     | 6                  |
| <b>Methods</b>               |        |                                                                                                                                                                                      |                    |
| Study design                 | 4      | Present key elements of study design early in the paper                                                                                                                              | 6                  |
| Setting                      | 5      | Describe the setting, locations, and relevant dates, including periods of recruitment, exposure, follow-up, and data collection                                                      | 6                  |
| Participants                 | 6      | (a) Give the eligibility criteria, and the sources and methods of selection of participants                                                                                          | 7                  |
| Variables                    | 7      | Clearly define all outcomes, exposures, predictors, potential confounders, and effect modifiers. Give diagnostic criteria, if applicable                                             | 7                  |
| Data sources/<br>measurement | 8*     | For each variable of interest, give sources of data and details of methods of assessment (measurement). Describe comparability of assessment methods if there is more than one group | 7                  |
| Bias                         | 9      | Describe any efforts to address potential sources of bias                                                                                                                            | 8                  |
| Study size                   | 10     | Explain how the study size was arrived at                                                                                                                                            | 7                  |
| Quantitative variables       | 11     | Explain how quantitative variables were handled in the analyses. If applicable, describe which groupings were chosen and why                                                         | 8                  |
| Statistical methods          | 12     | (a) Describe all statistical methods, including those used to control for confounding                                                                                                | 8                  |
|                              |        | (b) Describe any methods used to examine subgroups and interactions                                                                                                                  | 8                  |
|                              |        | (c) Explain how missing data were addressed                                                                                                                                          | 8                  |
|                              |        | (d) If applicable, describe analytical methods taking account of sampling strategy                                                                                                   | 8                  |

|                          |     |                                                                                                                                                                                                              |          |
|--------------------------|-----|--------------------------------------------------------------------------------------------------------------------------------------------------------------------------------------------------------------|----------|
|                          |     | (e) Describe any sensitivity analyses                                                                                                                                                                        | 8        |
| <b>Results</b>           |     |                                                                                                                                                                                                              |          |
| Participants             | 13* | (a) Report numbers of individuals at each stage of study—eg numbers potentially eligible, examined for eligibility, confirmed eligible, included in the study, completing follow-up, and analysed            | 9        |
|                          |     | (b) Give reasons for non-participation at each stage                                                                                                                                                         | 9        |
|                          |     | (c) Consider use of a flow diagram                                                                                                                                                                           | Figure 1 |
| Descriptive data         | 14* | (a) Give characteristics of study participants (eg demographic, clinical, social) and information on exposures and potential confounders                                                                     | 9        |
|                          |     | (b) Indicate number of participants with missing data for each variable of interest                                                                                                                          | 9        |
| Outcome data             | 15* | Report numbers of outcome events or summary measures                                                                                                                                                         | 9        |
| Main results             | 16  | (a) Give unadjusted estimates and, if applicable, confounder-adjusted estimates and their precision (eg, 95% confidence interval). Make clear which confounders were adjusted for and why they were included | 10       |
|                          |     | (b) Report category boundaries when continuous variables were categorized                                                                                                                                    | 9        |
|                          |     | (c) If relevant, consider translating estimates of relative risk into absolute risk for a meaningful time period                                                                                             | n/a      |
| Other analyses           | 17  | Report other analyses done—eg analyses of subgroups and interactions, and sensitivity analyses                                                                                                               | 10       |
| <b>Discussion</b>        |     |                                                                                                                                                                                                              |          |
| Key results              | 18  | Summarise key results with reference to study objectives                                                                                                                                                     | 11       |
| Limitations              | 19  | Discuss limitations of the study, taking into account sources of potential bias or imprecision. Discuss both direction and magnitude of any potential bias                                                   | 13       |
| Interpretation           | 20  | Give a cautious overall interpretation of results considering objectives, limitations, multiplicity of analyses, results from similar studies, and other relevant evidence                                   | 15       |
| Generalisability         | 21  | Discuss the generalisability (external validity) of the study results                                                                                                                                        | 14       |
| <b>Other information</b> |     |                                                                                                                                                                                                              |          |
| Funding                  | 22  | Give the source of funding and the role of the funders for the present study and, if applicable, for the original study on which the present article is based                                                | 17       |

\*Give information separately for cases and controls in case-control studies and, if applicable, for exposed and unexposed groups in cohort and cross-sectional studies.

**Note:** An Explanation and Elaboration article discusses each checklist item and gives methodological background and published examples of transparent reporting. The STROBE checklist is best used in conjunction with this article (freely available on the Web sites of PLoS Medicine at <http://www.plosmedicine.org/>, Annals of Internal Medicine at <http://www.annals.org/>, and Epidemiology at <http://www.epidem.com/>). Information on the STROBE Initiative is available at [www.strobe-statement.org](http://www.strobe-statement.org).
