# Supplementary material for: Effect of household relocation on child vaccination and health service utilisation in Dhaka, Bangladesh: a cross-sectional community survey
Source: PubMed Central journal article supplement (PMC6429946; doi:10.1136/bmjopen-2018-026176), 2019-03-15
Supplement: bmjopen-2018-026176supp001.pdf [file bmjopen-2018-026176supp001.pdf]

**Effect of household relocation on child vaccination and health service utilization in Dhaka, Bangladesh:  
a cross-sectional community survey**

**SUPPLEMENTAL FIGURES AND TABLES**

**Supplemental Table 1: Household wealth principal components analysis coding and variable loading**

| <b>Indicator</b>    | <b>Coding</b>                                                                                                                                   | <b>Loading</b> |
|---------------------|-------------------------------------------------------------------------------------------------------------------------------------------------|----------------|
| Number of rooms     | Continuous                                                                                                                                      | 0.337          |
| Housing arrangement | 1 = Free<br>2 = Rental<br>3 = Owned                                                                                                             | 0.235          |
| Roof                | 1 = Natural roof (bamboo/thatch)<br>2 = Rudimentary roof (tin)<br>3 = Finished roof (cement/concrete/tiled)<br>4 = Other                        | 0.392          |
| Walls               | 1 = Natural walls (jute/bamboo/mud)<br>2 = Rudimentary walls (wood)<br>3 = Finished walls (tin/brick/cement)<br>4 = Other                       | 0.316          |
| Floor               | 1 = Natural floor (earth/bamboo)<br>2 = Rudimentary floor (wood)<br>3 = Finished floor (cement/concrete)<br>4 = Other                           | 0.377          |
| Cooking fuel        | 1 = Natural (wood/grass/dung)<br>2 = Coal/charcoal<br>3 = Kerosene<br>4 = Electricity<br>5 = Gas (liquid/biogas)<br>6 = Other                   | 0.350          |
| Drinking water      | 1 = Unimproved (unprotected/surface/bottled)<br>2 = Improved but not piped<br>3 = Improved and piped into yard or private dwelling<br>4 = Other | 0.170          |
| Sanitation          | 1 = Unimproved (open defecation/hanging/open or broken pit)<br>2 = Improved but not piped                                                       | 0.374          |

|                        |                                           |       |
|------------------------|-------------------------------------------|-------|
|                        | 3 = Improved and piped sewer<br>4 = Other |       |
| Mobile phone ownership | 0 = No<br>1 = Yes                         | 0.380 |

Note: 51% of overall variance was explained by the first component.

**Supplemental Table 2: Using vaccination card plus maternal recall, vaccination coverage among children age 9-23 months and association with mobility status using univariate and multivariable models with modified Poisson regression**

|                                                  | Partial vaccination<br>n=518 (21%) |           | Full vaccination <sup>a</sup><br>n=1906 (79%) |           | PR <sup>b</sup> | 95% CI           | p-value          |
|--------------------------------------------------|------------------------------------|-----------|-----------------------------------------------|-----------|-----------------|------------------|------------------|
| <u>Univariate analyses</u>                       |                                    |           |                                               |           |                 |                  |                  |
| Mobility status                                  | <u>n</u>                           | <u>%</u>  | <u>n</u>                                      | <u>%</u>  |                 |                  |                  |
| Residentially stable $\geq 24$ months            | 243                                | 19        | 1053                                          | 81        | Reference       |                  |                  |
| Recently relocated $\leq 12$ months              | 275                                | 24        | 853                                           | 76        | <b>0.93</b>     | <b>0.88-0.98</b> | <b>0.009</b>     |
| Demographics                                     | <u>mean</u>                        | <u>SE</u> | <u>mean</u>                                   | <u>SE</u> |                 |                  |                  |
| Number of children <5yrs in household            | 1.31                               | 0.03      | 1.24                                          | 0.01      | <b>0.94</b>     | <b>0.89-0.99</b> | <b>0.035</b>     |
| Age of index child in months                     | 14.73                              | 0.20      | 16.35                                         | 0.11      | <b>1.02</b>     | <b>1.02-1.03</b> | <b>&lt;0.001</b> |
| Socioeconomics                                   |                                    |           |                                               |           |                 |                  |                  |
| Mother's education                               | <u>n</u>                           | <u>%</u>  | <u>n</u>                                      | <u>%</u>  |                 |                  |                  |
| No education                                     | 207                                | 41        | 303                                           | 59        | Reference       |                  |                  |
| Some schooling                                   | 121                                | 22        | 433                                           | 78        | <b>1.32</b>     | <b>1.18-1.47</b> | <b>&lt;0.001</b> |
| Finished secondary                               | 141                                | 16        | 719                                           | 84        | <b>1.41</b>     | <b>1.27-1.56</b> | <b>&lt;0.001</b> |
| > Higher secondary                               | 49                                 | 10        | 451                                           | 90        | <b>1.52</b>     | <b>1.36-1.69</b> | <b>&lt;0.001</b> |
| Occupation of household head                     |                                    |           |                                               |           |                 |                  |                  |
| Unemployed or other                              | 26                                 | 15        | 147                                           | 85        | Reference       |                  |                  |
| Daily labor                                      | 195                                | 38        | 318                                           | 62        | <b>0.73</b>     | <b>0.66-0.81</b> | <b>&lt;0.001</b> |
| Shopkeeper or merchant                           | 124                                | 19        | 538                                           | 81        | 0.96            | 0.88-1.04        | 0.287            |
| Salaried service                                 | 173                                | 16        | 903                                           | 84        | 0.99            | 0.91-1.07        | 0.752            |
| Household wealth status (PCA <sup>c</sup> )      |                                    |           |                                               |           |                 |                  |                  |
| Lowest                                           | 212                                | 40        | 321                                           | 60        | Reference       |                  |                  |
| Second                                           | 114                                | 25        | 348                                           | 75        | <b>1.25</b>     | <b>1.11-1.40</b> | <b>&lt;0.001</b> |
| Third                                            | 84                                 | 18        | 382                                           | 82        | <b>1.36</b>     | <b>1.20-1.54</b> | <b>&lt;0.001</b> |
| Fourth                                           | 59                                 | 10        | 560                                           | 90        | <b>1.50</b>     | <b>1.34-1.69</b> | <b>&lt;0.001</b> |
| Highest                                          | 49                                 | 14        | 295                                           | 86        | <b>1.42</b>     | <b>1.26-1.61</b> | <b>&lt;0.001</b> |
| Health services knowledge                        |                                    |           |                                               |           |                 |                  |                  |
| Does <i>not</i> have knowledge of local hospital | 127                                | 28        | 324                                           | 72        | Reference       |                  |                  |
| Has knowledge of local hospital                  | 391                                | 20        | 1582                                          | 80        | <b>1.12</b>     | <b>1.05-1.19</b> | <b>&lt;0.001</b> |

| <u>Multivariable analyses with different models</u>                         |             |                  |              |
|-----------------------------------------------------------------------------|-------------|------------------|--------------|
| Mobility, adjusting for demographics (# of children and age of index child) | <b>0.93</b> | <b>0.88-0.98</b> | <b>0.007</b> |
| Mobility, adjusting for socioeconomics (education, occupation, and wealth)  | 0.96        | 0.91-1.01        | 0.136        |
| Mobility, adjusting for demographics and socioeconomics                     | 0.96        | 0.92-1.01        | 0.138        |

<sup>a</sup>Full vaccination coverage per Expanded Programme on Immunization includes 1 dose of BCG, 3 doses of polio, 3 doses of DPT, and 1 dose of measles vaccines.

<sup>b</sup>PR, Prevalence Ratio.

<sup>c</sup>Polychoric Principal Components Analysis was used to create a household wealth index including structural housing characteristics, cooking fuel, drinking water, and sanitation.

**Supplemental Table 3: Using vaccination card only, vaccination coverage among children age 9-23 months who have vaccination cards and association with mobility status using univariate and multivariable models with modified Poisson regression**

|                                                  | Partial vaccination<br>n=281 (19%) |           | Full vaccination <sup>a</sup><br>n=1222 (81%) |           | PR <sup>b</sup> | 95% CI           | p-value          |
|--------------------------------------------------|------------------------------------|-----------|-----------------------------------------------|-----------|-----------------|------------------|------------------|
| <u>Univariate analyses</u>                       |                                    |           |                                               |           |                 |                  |                  |
| Mobility status                                  | <u>n</u>                           | <u>%</u>  | <u>n</u>                                      | <u>%</u>  |                 |                  |                  |
| Residentially stable $\geq 24$ months            | 156                                | 18        | 715                                           | 82        | Reference       |                  |                  |
| Recently relocated $\leq 12$ months              | 125                                | 20        | 507                                           | 80        | 0.97            | 0.92-1.04        | 0.469            |
| Demographics                                     | <u>mean</u>                        | <u>SE</u> | <u>mean</u>                                   | <u>SE</u> |                 |                  |                  |
| Number of children <5yrs in household            | 1.23                               | 0.03      | 1.21                                          | 0.01      | 0.98            | 0.93-1.04        | 0.543            |
| Age of index child in months                     | 14.4                               | 0.27      | 15.9                                          | 0.15      | <b>1.02</b>     | <b>1.01-1.03</b> | <b>&lt;0.001</b> |
| Socioeconomics                                   |                                    |           |                                               |           |                 |                  |                  |
| Mother's education                               | <u>n</u>                           | <u>%</u>  | <u>n</u>                                      | <u>%</u>  |                 |                  |                  |
| No education                                     | 94                                 | 35        | 176                                           | 65        | Reference       |                  |                  |
| Some schooling                                   | 57                                 | 17        | 286                                           | 83        | <b>1.28</b>     | <b>1.15-1.42</b> | <b>&lt;0.001</b> |
| Finished secondary                               | 93                                 | 17        | 461                                           | 83        | <b>1.28</b>     | <b>1.14-1.43</b> | <b>&lt;0.001</b> |
| > Higher secondary                               | 37                                 | 11        | 299                                           | 89        | <b>1.37</b>     | <b>1.22-1.52</b> | <b>&lt;0.001</b> |
| Occupation of household head                     |                                    |           |                                               |           |                 |                  |                  |
| Unemployed or other                              | 14                                 | 12        | 100                                           | 88        | Reference       |                  |                  |
| Daily labor                                      | 89                                 | 33        | 184                                           | 67        | <b>0.77</b>     | <b>0.68-0.87</b> | <b>&lt;0.001</b> |
| Shopkeeper or merchant                           | 66                                 | 16        | 352                                           | 84        | 0.96            | 0.88-1.04        | 0.327            |
| Salaried service                                 | 112                                | 16        | 586                                           | 84        | 0.96            | 0.88-1.04        | 0.297            |
| Household wealth status (PCA <sup>c</sup> )      |                                    |           |                                               |           |                 |                  |                  |
| Lowest                                           | 84                                 | 32        | 179                                           | 68        | Reference       |                  |                  |
| Second                                           | 67                                 | 24        | 211                                           | 76        | 1.12            | 0.99-1.25        | 0.062            |
| Third                                            | 52                                 | 17        | 248                                           | 83        | <b>1.21</b>     | <b>1.08-1.37</b> | <b>0.002</b>     |
| Fourth                                           | 42                                 | 10        | 381                                           | 90        | <b>1.32</b>     | <b>1.18-1.48</b> | <b>&lt;0.001</b> |
| Highest                                          | 36                                 | 15        | 203                                           | 85        | <b>1.25</b>     | <b>1.10-1.41</b> | <b>&lt;0.001</b> |
| Health services knowledge                        |                                    |           |                                               |           |                 |                  |                  |
| Does <i>not</i> have knowledge of local hospital | 55                                 | 22        | 194                                           | 78        | Reference       |                  |                  |
| Has knowledge of local hospital                  | 226                                | 18        | 1028                                          | 82        | 1.05            | 0.98-1.13        | 0.141            |

| <u>Multivariable analyses with different models</u>                         |      |           |       |
|-----------------------------------------------------------------------------|------|-----------|-------|
| Mobility, adjusting for demographics (# of children and age of index child) | 0.98 | 0.93-1.04 | 0.582 |
| Mobility, adjusting for socioeconomics (education, occupation, and wealth)  | 1.00 | 0.94-1.06 | 0.948 |
| Mobility, adjusting for demographics and socioeconomics                     | 1.00 | 0.95-1.07 | 0.888 |

<sup>a</sup>Full vaccination coverage per Expanded Programme on Immunization includes 1 dose of BCG, 3 doses of polio, 3 doses of DPT, and 1 dose of measles vaccines.

<sup>b</sup>PR, Prevalence Ratio.

<sup>c</sup>Polychoric Principal Components Analysis was used to create a household wealth index including structural housing characteristics, cooking fuel, drinking water, and sanitation.
